# Supplementary material for: Deacetylative cyanation: a cyanide-free route to thiocyanates and cyanamides
Source: Royal Society of Chemistry journal article supplement (doi:10.1039/d4cc04539d), 2024-01-01
Supplement: d4cc04539d1.pdf [file d4cc04539d1.pdf]

*Supplementary Information*

**Deacetylation Cyanation: A Cyanide-Free Route to Thiocyanates and  
Cyanamides**

Si Yeon Kim<sup>a</sup> and Hee Nam Lim<sup>a\*</sup>

<sup>a</sup>Department of Chemistry, Yeungnam University, 280 Daehak-Ro, Gyeongsan, Gyeongbuk, 38541,  
Republic of Korea

[\\*E-mail: heenam@yu.ac.kr](mailto:heenam@yu.ac.kr)

**Table of Contents**

|                                                                       |        |
|-----------------------------------------------------------------------|--------|
| 1. Materials and Methods .....                                        | S2     |
| 2. Table S1. Reaction Optimization .....                              | S2     |
| 3. Table S2. Optimization for synthesis of <b>5</b> .....             | S3     |
| 4. Experimental Procedures and Characterization Data                  |        |
| 1) Compounds <b>3</b> .....                                           | S4     |
| 2) Compounds <b>6a–6n</b> .....                                       | S5–7   |
| 3) Compounds <b>5a–5k</b> .....                                       | S7–10  |
| 4) Compounds <b>7a–7k</b> .....                                       | S10–12 |
| 5) Compounds <b>9</b> .....                                           | S12    |
| 6) Compounds <b>10, 11</b> .....                                      | S13    |
| 7) Compounds <b>12, 13</b> .....                                      | S14    |
| 5. <sup>1</sup> H-NMR, <sup>13</sup> C-NMR, <sup>19</sup> F-NMR ..... | S15–46 |
| 6. References .....                                                   | S47    |

## 1. Materials and Methods

Common solvents including Dichloromethane (CH<sub>2</sub>Cl<sub>2</sub>), Tetrahydrofuran (THF), Acetonitrile (CH<sub>3</sub>CN) and Chloroform (CHCl<sub>3</sub>), etc. were directly used after purchase from TCI chemicals without further purification. Thin layer chromatography (TLC) analysis was run on silica gel plates. Most of spots were visualized by exposure to ultraviolet (UV) light (254 nm). Some spots that were invisible to ultraviolet (UV) used PMA stain solution. NMR and HRMS spectra were recorded using Bruker DPX 300, VNMR 600 MHz (either on 300 or 600 MHz for <sup>1</sup>H, 565 MHz for <sup>19</sup>F NMR, and either on 75 or 150 MHz for <sup>13</sup>C) and Vanquish UHPLC High Resolution Mass System with ion trap (orbitrap) mass analyzer [Ionization mode: ESI] at Core Research Support Center for Natural Products and Medical Materials at Yeungnam University. High-resolution mass spectra were reported for the molecular ion [M+Na]<sup>+</sup> or [M+H]<sup>+</sup>. Chemical shifts for proton NMR spectra are reported in parts per million (ppm) relative to the singlet at 7.26 ppm for chloroform-d, to the quintet at 2.50 ppm for dimethylsulfoxide-d<sub>6</sub>, and quintet at 2.05 ppm for acetone-d<sub>6</sub>. Chemical shifts for carbon NMR spectra are reported in 77.16 ppm with the center line of triplet for chloroform-d and in 39.52 ppm with the center line of the septet for dimethylsulfoxide-d<sub>6</sub>. Data for <sup>1</sup>H NMR were presented as following: chemical shifts (δ, ppm), multiplicity (br = broad, s = singlet, d = doublet, t = triplet, q = quartet, p = pentet, dd = doublet of doublets, m = multiplet), coupling constant (Hz), and integration. The chemical shifts of peaks found were reported for <sup>13</sup>C NMR spectra. Infrared spectra were recorded with a Nicole iS10 FTIR Spectrometer.

[Cautions: DAST (N,N-diethylaminosulfur trifluoride) should be stored in the fridge, and the reactions using this reagent are recommended to run under 50 °C. Due to its explosive and exothermic nature above 90 °C, the bulk synthesis using this reagent is not recommended at elevated temperatures. Use DAST under a fume hood and avoid contact with water. For small-scale reactions (up to 1 mmol) described in this paper, a normal round bottom flask can be used without noticeable glass etching problems, likely due to the short reaction time. However, for large-scale reactions, it is recommended to use Teflon bottles instead of common glassware]

## 2. Table S1. Reaction Optimization for Synthesis of 4a

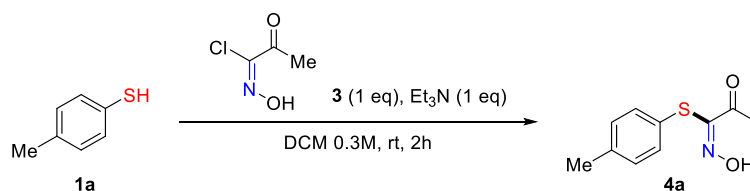

### Base screening in DCM as solvent

| Entry | Reaction Conditions                       | Yield (%) <sup>a</sup> |    |
|-------|-------------------------------------------|------------------------|----|
|       |                                           | 1a                     | 4a |
| 1     | triethylamine                             | 8                      | 85 |
| 2     | 1,8-diazabicyclo[5.4.0]undec-7-ene (DBU)  | 20                     | <5 |
| 3     | <i>N,N</i> -diisopropylethylamine (DIPEA) | 15                     | 84 |
| 4     | 1,4-diazabicyclo[2.2.2]octane (DABCO)     | 12                     | 75 |
| 5     | K <sub>2</sub> CO <sub>3</sub>            | 33                     | 52 |
| 6     | NaOH                                      | 22                     | 41 |
| 7     | NaH                                       | 23                     | 28 |

<sup>a</sup>NMR yields with 1,3,5-trimethoxybenzene as internal standard.

### 3. Table S2. Optimization for synthesis of 5

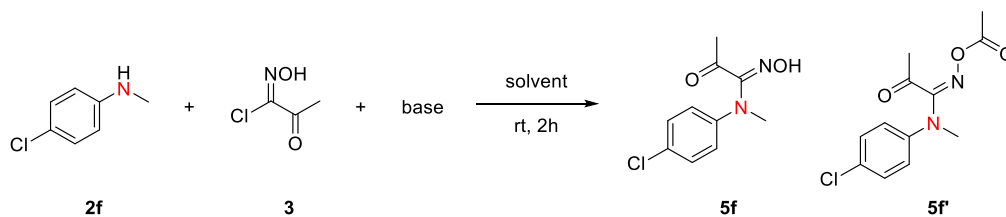

#### S2-1. Solvent screening

| Entry | conditions |           |                            |                    | Yield (%) <sup>a</sup> |    |     |
|-------|------------|-----------|----------------------------|--------------------|------------------------|----|-----|
|       | 2f (equiv) | 3 (equiv) | base (equiv)               | solvent            | 2f                     | 5f | 5f' |
| 1     | 1          | 1         | Et <sub>3</sub> N (1.0 eq) | DMF                | 70                     | 12 | 12  |
| 2     | 1          | 1         | Et <sub>3</sub> N (1.0 eq) | CH <sub>3</sub> CN | 72                     | 6  | 13  |
| 3     | 1          | 1         | Et <sub>3</sub> N (1.0 eq) | Toluene            | 65                     | 7  | 25  |
| 4     | 1          | 1         | Et <sub>3</sub> N (1.0 eq) | TBME               | 61                     | 12 | 22  |
| 5     | 1          | 1         | Et <sub>3</sub> N (1.0 eq) | DCM                | 65                     | 9  | 22  |
| 6     | 1          | 1         | Et <sub>3</sub> N (1.0 eq) | THF                | 58                     | 16 | 20  |

<sup>a</sup>NMR yields with 1,3,5-trimethoxybenzene as internal standard.

#### S2-2. Base screening

| Entry | conditions |           |                                             |             | Yield (%) <sup>a</sup> |                            |          |
|-------|------------|-----------|---------------------------------------------|-------------|------------------------|----------------------------|----------|
|       | 2f (equiv) | 3 (equiv) | base (equiv)                                | solvent     | 2f                     | 5f <sup>a</sup>            | 5f'      |
| 1     | 1          | 2         | Et <sub>3</sub> N (1.0 eq)                  | THF         | 10                     | 55                         | 15       |
| 2     | 1          | 2         | Et <sub>3</sub> N (2.0 eq)                  | THF         | 18                     | 31                         | 44       |
| 3     | 1          | 2         | DBU (1.0 eq)                                | THF         | 67                     | <3                         | <3       |
| 4     | 1          | 2         | DIPEA (1.0 eq)                              | THF         | 31                     | 38                         | 20       |
| 5     | 1          | 2         | K <sub>2</sub> CO <sub>3</sub> (1.0 eq)     | THF         | 0                      | 82                         | <5       |
| 6     | 1          | 2         | K <sub>2</sub> CO <sub>3</sub> (1.0 eq)     | MeOH        | <5                     | 79                         | 10       |
| 7     | <b>1</b>   | <b>2</b>  | <b>K<sub>2</sub>CO<sub>3</sub> (2.0 eq)</b> | <b>MeOH</b> | <b>&lt;1</b>           | <b>88 (75)<sup>b</sup></b> | <b>0</b> |

<sup>a</sup>NMR yields with 1,3,5-trimethoxybenzene as internal standard. <sup>b</sup>Isolated yield

## 4. Experimental Procedures

### 4. 1) Procedure for synthesis of *N*-hydroxy-2-oxopropanimidoyl chloride (**3**)<sup>1</sup>

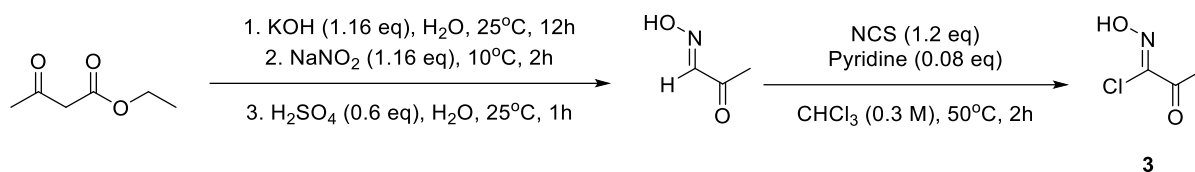

Step 1: KOH (5.15 g, 91.7 mmol) was charged in water (50.0 mL) and stirred for 10-15 min at room temperature and then cooled to 0 °C. Ethyl acetoacetate (10.0 mL, 79.1 mmol) was added dropwise. The resulting mixture was allowed to reach 25 °C and stirred for 12 h. It was then cooled to 10 °C, and the sodium nitrite (6.38 g, 92.5 mmol) was added portion wise. After 2 h, an aqueous solution of sulfuric acid (2.53 mL, 47.4 mmol, in 10.0 mL water) was added over while maintaining the temperature at 0 °C. Upon completion of the addition, the resulting mixture was stirred for 1 h at room temperature. The mixture was next extracted with ethyl acetate (6 x 100 mL). The combined organic solution was dried over MgSO<sub>4</sub>, filtered, and concentrated to afford (*E*)-2-oxopropanal oxime (5.87 g, 67.4 mmol, 88% yield) as a white solid.

Step 2: (*E*)-2-oxopropanal oxime (3.13 g, 35.9 mmol) was dissolved in CHCl<sub>3</sub> (120 mL) in the presence of a catalytic amount of pyridine (0.23 mL, 2.9 mmol); the reaction mixture was stirred at 50 °C, then stepwise added with portions of *N*-chlorosuccinimide (NCS) (5.76g, 43.1 mmol). The reaction mixture was kept stirring at 50 °C for 2 h, and the reaction was monitored by TLC. Then, it was quenched with ice water (200 mL) and extracted with diethyl ether (250 mL). The combined organic solution was washed with ice water (3 X 200 mL), dried over MgSO<sub>4</sub>, filtered, concentrated and recrystallized (Hex:EtOAc = 20:1, 135 mL) to afford *N*-hydroxy-2-oxopropanimidoyl chloride **3** (2.86g, 66%) as white solid.

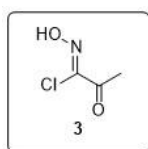

***N*-hydroxy-2-oxopropanimidoyl chloride (**3**)**;<sup>1</sup>  $R_f = 0.6$  (Hex:EtOAc = 3:1); <sup>1</sup>H NMR (300 MHz, CDCl<sub>3</sub>)  $\delta$  8.80 (br s, 1H), 2.51 (s, 3H). <sup>13</sup>C NMR (75 MHz, CDCl<sub>3</sub>)  $\delta$  189.1, 140.5, 26.0.

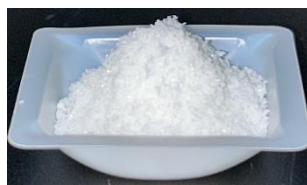

#### 4. 2) General procedure for preparation of thiocyanates 6a–6n

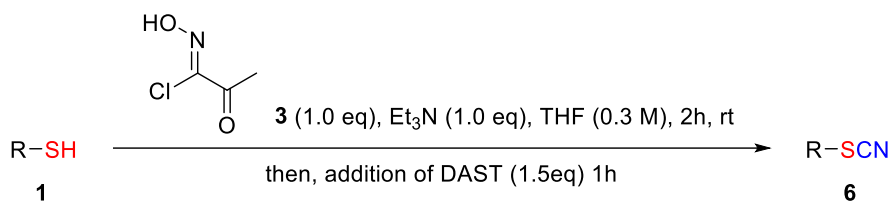

To a stirred solution of **3** (122 mg, 1.0 mmol) in THF (3 mL) was added **1** (1.0 mmol) and triethylamine (0.14 mL, 1.0 mmol) at 0 °C. Then, reaction mixture was warmed to room temperature. Upon full conversion of **3**, (diethylamino)sulfur trifluoride (DAST, 0.20 mL, 1.5 mmol) was added to the reaction mixture. After 1 h, the reaction mixture was quenched with sat. NaHCO<sub>3</sub> sol'n (15 mL) and extracted with diethyl ether (10 X 2 mL). The organic solution was dried over MgSO<sub>4</sub>, filtered, concentrated, and subjected to silica gel column chromatography (Hex:EtOAc = 20:1 or 10:1) to afford **6**.

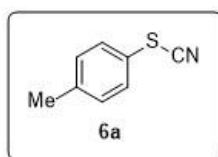

**1-methyl-4-thiocyanatobenzene (6a)**;<sup>2</sup> The title compound was prepared according to the general procedure; 199 mg, 80%; yellow solid;  $R_f = 0.7$  (Hex:EtOAc = 5:1); <sup>1</sup>H NMR (300 MHz, CDCl<sub>3</sub>)  $\delta$  7.43 (d,  $J = 8.3$  Hz, 2H), 7.24 (d,  $J = 8.2$  Hz, 2H), 2.38 (s, 3H). IR (neat)  $\nu_{\text{max}}$  3025, 2922, 2156, 1493, 1450 cm<sup>-1</sup>.

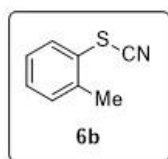

**1-methyl-2-thiocyanatobenzene (6b)**;<sup>2</sup> The title compound was prepared according to the general procedure; 127 mg, 85%; yellow oil  $R_f = 0.5$  (Hex:EtOAc = 20:1); <sup>1</sup>H NMR (600 MHz, CDCl<sub>3</sub>)  $\delta$  7.63 (d,  $J = 7.7$  Hz, 1H), 7.34 (t,  $J = 7$  Hz, 1H), 7.30–7.26 (m, 2H), 2.48 (s, 3H). IR (neat)  $\nu_{\text{max}}$  3063, 2984, 2924, 2843, 2157, 1473 cm<sup>-1</sup>.

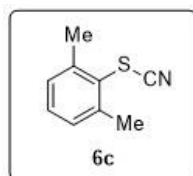

**1,3-dimethyl-2-thiocyanatobenzene (6c)**;<sup>2</sup> The title compound was prepared according to the general procedure; 122 mg, 75%; white solid;  $R_f = 0.6$  (Hex:EtOAc = 10:1); <sup>1</sup>H NMR (600 MHz, CDCl<sub>3</sub>)  $\delta$  7.27 (dd,  $J = 7.7, 7.4$  Hz, 1H), 7.18 (d,  $J = 7.5$  Hz, 2H), 2.60 (s, 6H). IR (neat)  $\nu_{\text{max}}$  2952, 2916, 2151, 1463, 1034 cm<sup>-1</sup>.

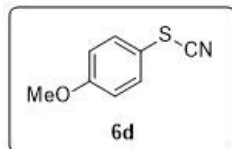

**1-methoxy-4-thiocyanatobenzene (6d)**;<sup>2</sup> The title compound was prepared according to the general procedure; 119 mg, 72%; yellow solid;  $R_f = 0.6$  (Hex:EtOAc = 5:1); <sup>1</sup>H NMR (300 MHz, CDCl<sub>3</sub>)  $\delta$  7.50 (d,  $J = 8.9$  Hz, 2H), 6.95 (d,  $J = 8.9$  Hz, 2H), 3.83 (s, 3H). IR (neat)  $\nu_{\text{max}}$  2918, 2852, 2155, 1591, 1495 cm<sup>-1</sup>.

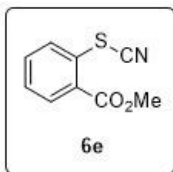

**Methyl 2-thiocyanatobenzoate (6e);**<sup>2</sup> The title compound was prepared according to the general procedure; 137 mg, 71%; white solid;  $R_f = 0.5$  (Hex:EtOAc = 5:1);  $^1\text{H}$  NMR (600 MHz,  $\text{CDCl}_3$ )  $\delta$  8.12 (dd,  $J = 7.9$  Hz, 1.5 Hz, 1H), 7.91 (dd,  $J = 8.2$  Hz, 0.7 Hz, 1H), 7.64 (m, 1H), 7.41 (m, 1H), 3.96 (s, 3H). IR (neat)  $\nu_{\text{max}}$  2961, 2911, 2153, 1698, 1309  $\text{cm}^{-1}$ .

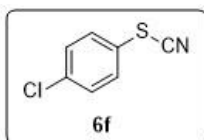

**1-chloro-4-thiocyanatobenzene (6f);**<sup>2</sup> The title compound was prepared according to the general procedure; 129 mg, 76%; yellow solid;  $R_f = 0.7$  (Hex:EtOAc = 5:1);  $^1\text{H}$  NMR (600 MHz,  $\text{CDCl}_3$ )  $\delta$  7.48 (m, 2H), 7.42 (m, 2H). IR (neat)  $\nu_{\text{max}}$  3085, 2924, 2849, 2159, 1476, 1391  $\text{cm}^{-1}$ .

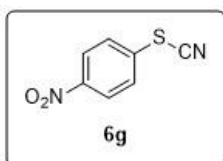

**1-nitro-4-thiocyanatobenzene (6g);**<sup>2</sup> The title compound was prepared according to the general procedure; 117 mg, 65%; white solid;  $R_f = 0.5$  (Hex:EtOAc = 3:1);  $^1\text{H}$  NMR (600 MHz,  $\text{CDCl}_3$ )  $\delta$  8.30 (m, 2H), 7.67 (m, 2H). IR (neat)  $\nu_{\text{max}}$  3104, 2920, 2846, 2163, 1578, 1343  $\text{cm}^{-1}$ .

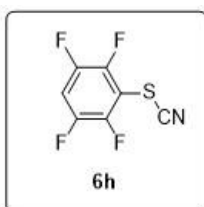

**1,2,4,5-tetrafluoro-3-thiocyanatobenzene (6h);**<sup>2</sup> The title compound was prepared according to the general procedure; 108 mg, 52%; yellow oil;  $R_f = 0.4$  (Hex:EtOAc = 20:1);  $^1\text{H}$  NMR (600 MHz,  $\text{CDCl}_3$ )  $\delta$  7.35–7.29 (m, 1H).  $^{19}\text{F}$  NMR (565 MHz,  $\text{CDCl}_3$ )  $\delta$  -130.20 (m), -134.76 (m). IR (neat)  $\nu_{\text{max}}$  3076, 2926, 2167, 1501, 1239  $\text{cm}^{-1}$ .

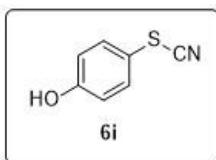

**4-thiocyanatophenol (6i);**<sup>2</sup> The title compound was prepared according to the general procedure; 70 mg, 46%; yellow oil;  $R_f = 0.2$  (Hex:EtOAc = 5:1);  $^1\text{H}$  NMR (300 MHz,  $\text{CDCl}_3$ )  $\delta$  7.47 (m, 2H), 6.89 (m, 2H). IR (neat)  $\nu_{\text{max}}$  3365, 2917, 2852, 2159, 1584, 1496  $\text{cm}^{-1}$ .

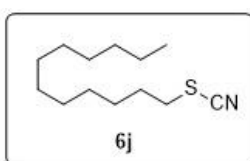

**1-thiocyanatododecane (6j);**<sup>2</sup> The title compound was prepared according to the general procedure; 161 mg, 71%; yellow oil;  $R_f = 0.5$  (Hex:EtOAc = 20:1);  $^1\text{H}$  NMR (600 MHz,  $\text{CDCl}_3$ )  $\delta$  2.94 (t,  $J = 7.2$  Hz, 2H), 1.84–1.79 (m, 2H), 1.46–1.41 (m, 2H), 1.32–1.26 (m, 16H), 0.88 (t,  $J = 6.9$  Hz, 3H). IR (neat)  $\nu_{\text{max}}$  2925, 2854, 2155, 1789, 1466, 1173  $\text{cm}^{-1}$ .

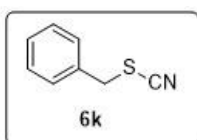

**(Thiocyanatomethyl)benzene (6k);**<sup>2</sup> The title compound was prepared according to the general procedure; 112 mg, 75%; yellow oil;  $R_f = 0.5$  (Hex:EtOAc = 5:1);  $^1\text{H}$  NMR (600 MHz,  $\text{CDCl}_3$ )  $\delta$  7.41–7.36 (m, 5H), 4.17 (s, 2H). IR (neat)  $\nu_{\text{max}}$  3063, 3032, 2153, 1495, 1455, 1245  $\text{cm}^{-1}$ .

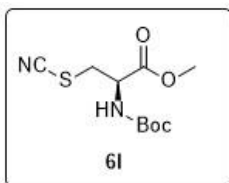

**Methyl N-(tert-butoxycarbonyl)-S-cyano-L-cysteinate (6l);**<sup>3</sup> The title compound was prepared according to the general procedure; 141 mg, 54%; yellow solid;  $R_f = 0.4$  (Hex:EtOAc = 3:1);  $^1\text{H NMR}$  (600 MHz,  $\text{CDCl}_3$ )  $\delta$  5.52 (br d,  $J = 3.8$  Hz, 1H), 4.68 (m, 1H), 3.84 (s, 3H), 3.53 (dd,  $J = 13.9, 4.0$  Hz, 1H), 3.44 (dd,  $J = 13.9, 3.7$  Hz), 1.45 (s, 9H). IR (neat)  $\nu_{\text{max}}$  3369, 2979, 2156, 1715, 1511  $\text{cm}^{-1}$ .

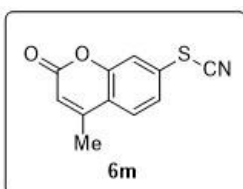

**4-methyl-7-thiocyanato-2H-chromen-2-one (6m);**<sup>4</sup> The title compound was prepared according to the general procedure; 185 mg, 85%; white solid;  $R_f = 0.2$  (Hex:EtOAc = 3:1);  $^1\text{H NMR}$  (300 MHz,  $\text{DMSO}-d_6$ )  $\delta$  7.90 (d,  $J = 8.4$  Hz, 1H), 7.70 (d,  $J = 1.9$  Hz, 1H), 7.60 (dd,  $J = 8.4, 1.9$  Hz, 1H), 6.49 (s, 1H), 2.44 (d,  $J = 1.1$  Hz, 3H). IR (neat)  $\nu_{\text{max}}$  2916, 2863, 2163, 1749, 1602, 1392  $\text{cm}^{-1}$ .

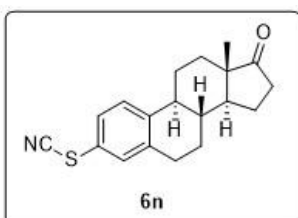

**(8R,9S,13S,14S)-13-methyl-3-thiocyanato-6,7,8,9,11,12,13,14,15,16-decahydro-17H-cyclopenta[a]phenanthren-17-one (6n);** 206 mg, 66%; white solid;  $R_f = 0.5$  (Hex:EtOAc = 3:1);  $^1\text{H NMR}$  (600 MHz,  $\text{CDCl}_3$ )  $\delta$  7.35 (d,  $J = 8.3$  Hz, 1H), 7.30–7.27 (m, 2H), 2.94–2.91 (m, 2H), 2.51 (m, 1H), 2.40 (m, 1H), 2.29 (m, 1H), 2.15 (m, 1H), 2.09–2.03 (m, 2H), 1.97 (m, 1H), 1.61–1.59 (m, 2H), 1.55–1.43 (m, 4H), 0.92 (s, 3H).  $^{13}\text{C NMR}$  (150 MHz,  $\text{CDCl}_3$ )  $\delta$  220.6, 142.1, 139.3, 131.0, 127.9, 127.5, 121.1, 111.1, 50.5, 48.0, 44.3, 37.9, 35.9, 31.6, 29.3, 26.2, 25.7, 21.7, 13.9. IR (neat)  $\nu_{\text{max}}$  2931, 2863, 2155, 1738, 1484, 1008  $\text{cm}^{-1}$ . HRMS[ESI] calcd for  $\text{C}_{19}\text{H}_{21}\text{ONNaS}$   $[\text{M}+\text{Na}]^+$  334.1242, found 324.1227.

#### 4. 3) General Procedure for the synthesis of 5a–5g

##### General Procedure for the synthesis of 5a–5g

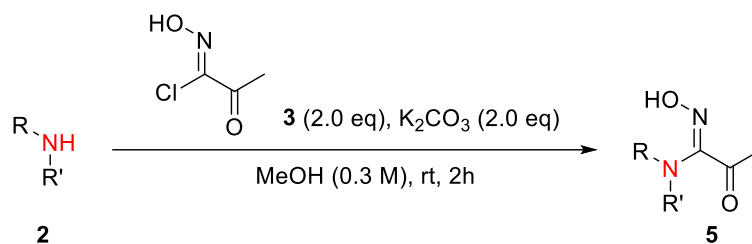

To a stirred solution of **2a–g** (2.5 mmol) in MeOH (8 mL) was added **3** (5 mmol) and  $\text{K}_2\text{CO}_3$  (5 mmol) at room temperature. After 2 h, the reaction mixture was concentrated under reduced pressure to remove the MeOH. Then, it was neutralized with sat.  $\text{NH}_4\text{Cl}$  sol'n (20 mL) and extracted with ethyl acetate (15 mL X 3). Then, the organic solution was dried over  $\text{MgSO}_4$ , filtered, concentrated, and subjected to silica gel column chromatography (Hex:EtOAc = 5:1 or 3:1) to afford **5a–g**.

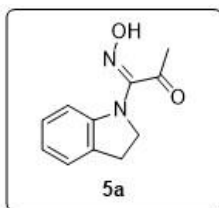

**(E)-1-(hydroxyimino)-1-(indolin-1-yl)propan-2-one (5a);** The title compound was prepared according to the general procedure; 475 mg, 93%; yellow solid;  $R_f = 0.4$  (Hex:EtOAc = 3:1);  $^1\text{H NMR}$  (600 MHz,  $\text{CDCl}_3$ )  $\delta$  8.07 (br s, 1H), 7.16 (d,  $J = 7.3$  Hz, 1H), 7.03 (t,  $J = 7.7$  Hz, 1H), 6.83 (t,  $J = 7.4$ , 1H), 6.27 (d,  $J = 7.9$  Hz, 1H), 4.04 (t,  $J = 8.4$  Hz, 2H), 3.16 (t,  $J = 8.4$  Hz, 2H), 2.46 (s, 3H).  $^{13}\text{C NMR}$  (150 MHz,  $\text{CDCl}_3$ )  $\delta$  194.0, 149.2, 145.5, 130.0, 126.8, 124.9, 120.9, 111.9, 52.0, 29.5, 27.3. IR (neat)  $\nu_{\text{max}}$  3320, 3031, 2898, 1698, 1592, 1487  $\text{cm}^{-1}$ . HRMS[ESI] calcd for  $\text{C}_{11}\text{H}_{13}\text{O}_2\text{N}_2$   $[\text{M}+\text{H}]^+$  205.0972, found 205.0968.

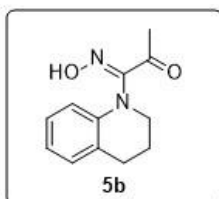

**(Z)-1-(3,4-dihydroquinolin-1(2H)-yl)-1-(hydroxyimino)propan-2-one (5b);** The title compound was prepared according to the general procedure; 442 mg, 81%; yellow solid;  $R_f = 0.5$  (Hex:EtOAc = 3:1);  $^1\text{H NMR}$  (600 MHz,  $\text{CDCl}_3$ )  $\delta$  8.61 (br s, 1H), 7.05 (d,  $J = 7.4$  Hz, 1H), 6.97 (m, 1H), 6.80 (m, 1H), 6.20 (d,  $J = 8.0$  Hz, 1H), 3.49–3.47 (m, 2H), 2.87 (t,  $J = 6.4$  Hz, 2H), 2.44 (s, 3H), 2.05–2.03 (m, 2H).  $^{13}\text{C NMR}$  (150 MHz,  $\text{CDCl}_3$ )  $\delta$  194.3, 152.1, 140.6, 129.9, 126.7, 124.2, 120.6, 116.0, 47.9, 27.11, 27.09, 22.3. IR (neat)  $\nu_{\text{max}}$  3331, 2933, 2876, 1763, 1701, 1579, 1495  $\text{cm}^{-1}$ . HRMS[ESI] calcd for  $\text{C}_{12}\text{H}_{15}\text{O}_2\text{N}_2$   $[\text{M}+\text{H}]^+$  219.1128, found 219.1126.

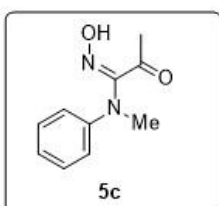

**(Z)-N'-hydroxy-N-methyl-2-oxo-N-phenylpropanimidamide (5c);** The title compound was prepared according to the general procedure; 404 mg, 84%; yellow solid;  $R_f = 0.5$  (Hex:EtOAc = 3:1);  $^1\text{H NMR}$  (600 MHz,  $\text{CDCl}_3$ )  $\delta$  8.40 (br s, 1H), 7.26–7.24 (m, 2H), 6.93 (t,  $J = 7.4$  Hz, 1H), 6.70 (d,  $J = 7.9$  Hz, 2H), 3.18 (s, 3H), 2.43 (s, 3H).  $^{13}\text{C NMR}$  (150 MHz,  $\text{CDCl}_3$ )  $\delta$  194.4, 152.5, 145.3, 129.3, 121.2, 115.6, 36.6, 27.0. IR (neat)  $\nu_{\text{max}}$  3330, 2923, 1759, 1701, 1593, 1497  $\text{cm}^{-1}$ . HRMS[ESI] calcd for  $\text{C}_{10}\text{H}_{13}\text{O}_2\text{N}_2$   $[\text{M}+\text{H}]^+$  193.0972, found 193.0969.

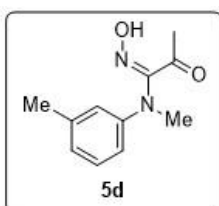

**(Z)-N'-hydroxy-N-methyl-2-oxo-N-(m-tolyl)propanimidamide (5d);** The title compound was prepared according to the general procedure; 490 mg, 95%; yellow oil;  $R_f = 0.4$  (Hex:EtOAc = 3:1);  $^1\text{H NMR}$  (600 MHz,  $\text{CDCl}_3$ )  $\delta$  8.41 (br s, 1H), 7.13 (t,  $J = 7.7$  Hz, 1H), 6.75 (d,  $J = 7.1$  Hz, 1H), 6.53–6.50 (m, 2H), 3.16 (s, 3H), 2.42 (s, 3H), 2.30 (s, 3H).  $^{13}\text{C NMR}$  (150 MHz,  $\text{CDCl}_3$ )  $\delta$  194.4, 152.7, 145.3, 139.2, 129.1, 122.3, 116.2, 112.9, 36.7, 27.1, 21.8. IR (neat)  $\nu_{\text{max}}$  3331, 3023, 2919, 1763, 1701, 1583  $\text{cm}^{-1}$ . HRMS[ESI] calcd for  $\text{C}_{11}\text{H}_{15}\text{O}_2\text{N}_2$   $[\text{M}+\text{H}]^+$  207.1128, found 207.1126.

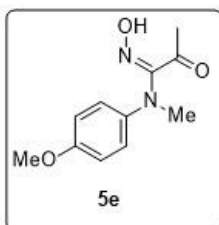

**(Z)-N'-hydroxy-N-(4-methoxyphenyl)-N-methyl-2-oxopropanimidamide (5e);** The title compound was prepared according to the general procedure; 517 mg, 93%; yellow solid;  $R_f = 0.4$  (Hex:EtOAc = 3:1);  $^1\text{H NMR}$  (600 MHz,  $\text{CDCl}_3$ , mixture of isomers, ratio 25:1)  $\delta$  8.15 (br s, 1H), 6.83–6.80 (m, 2H), 6.73–6.70 (m, 2H), 3.76 (s, 3H), 3.17 (s, 3H), 2.39 (s, 3H).  $^{13}\text{C NMR}$  (150 MHz,  $\text{CDCl}_3$ )  $\delta$  194.7, 154.9, 152.9, 139.3, 118.0, 114.7, 55.7, 37.5, 27.2. IR (neat)  $\nu_{\text{max}}$  3416, 1692, 1633, 1511, 1245  $\text{cm}^{-1}$ . HRMS[ESI] calcd for  $\text{C}_{11}\text{H}_{15}\text{O}_3\text{N}_2$   $[\text{M}+\text{H}]^+$  223.1077, found 223.1075.



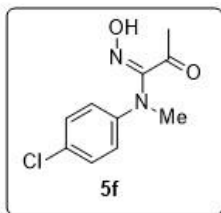

**(Z)-N-(4-chlorophenyl)-N'-hydroxy-N-methyl-2-oxopropanimidamide (5f);**

The title compound was prepared according to the general procedure; 425 mg, 75%; yellow solid;  $R_f = 0.4$  (Hex:EtOAc = 3:1);  $^1\text{H NMR}$  (300 MHz,  $\text{CDCl}_3$ )  $\delta$  7.97 (br s, 1H), 7.18 (m, 2H), 6.60 (m, 2H), 3.14 (s, 3H), 2.43 (s, 3H).  $^{13}\text{C NMR}$  (150 MHz,  $\text{CDCl}_3$ )  $\delta$  194.1, 152.0, 144.1, 129.1, 126.0, 116.7, 36.8, 27.0. IR (neat)  $\nu_{\text{max}}$  3320, 2917, 2227, 1693, 1592, 1117  $\text{cm}^{-1}$ . HRMS[ESI] calcd for  $\text{C}_{10}\text{H}_{12}\text{O}_2\text{N}_2\text{Cl}$   $[\text{M}+\text{H}]^+$  227.0582, found 227.0578.

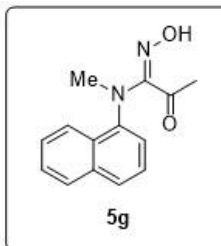

**(E)-N'-hydroxy-N-methyl-N-(naphthalen-1-yl)-2-oxopropanimidamide (5g);**

The title compound was prepared according to the general procedure; 503 mg, 83%; yellow oil.  $R_f = 0.5$  (Hex:EtOAc = 3:1);  $^1\text{H NMR}$  (300 MHz,  $\text{CDCl}_3$ )  $\delta$  7.95 (m, 1H), 7.86 (m, 1H), 7.67 (d,  $J = 8.2$  Hz, 1H), 7.52–7.42 (m, 3H), 7.32 (dd,  $J = 7.4, 1.0$  Hz, 1H), 3.47 (s, 3H), 2.28 (s, 3H).  $^{13}\text{C NMR}$  (75 MHz,  $\text{CDCl}_3$ )  $\delta$  195.2, 152.9, 143.8, 134.6, 129.5, 128.7, 126.3, 126.1, 125.8, 122.7, 120.7, 40.9, 27.5. IR (neat)  $\nu_{\text{max}}$  3331, 3052, 1698, 1594, 1351, 1082  $\text{cm}^{-1}$ . HRMS[ESI] calcd for  $\text{C}_{14}\text{H}_{15}\text{O}_2\text{N}_2$   $[\text{M}+\text{H}]^+$  243.1128, found 243.1126.

**General Procedure for the synthesis of 5h–5k**

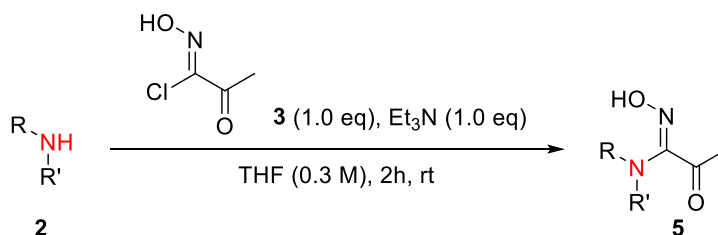

To a stirred solution of **3** (304 mg, 2.5 mmol) in THF (8 mL) was added **2h–k** (2.5 mmol) and triethylamine (0.35 mL, 2.5 mmol) at 0 °C. The reaction mixture was stirred at room temperature for 2 h. Then, the reaction mixture was diluted with water (20 mL) and extracted with ethyl acetate (15 mL X 3). The organic solution was dried over  $\text{MgSO}_4$ , filtered, concentrated, and subjected to silica gel column chromatography (Hex:EtOAc = 5:1 or 3:1) to afford **5h–k**.

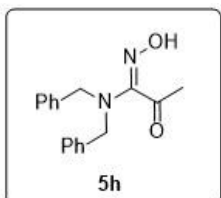

**(Z)-N,N-dibenzyl-N'-hydroxy-2-oxopropanimidamide (5h);**

The title compound was prepared according to the general procedure; 522 mg, 74%; white solid;  $R_f = 0.6$  (Hex:EtOAc = 3:1);  $^1\text{H NMR}$  (600 MHz,  $\text{CDCl}_3$ , mixture of isomers, ratio 1:0.8)  $\delta$  7.35–7.25 (m, 18H), 4.28 (s, 4H), 4.26 (s, 3.2H), 2.38 (s, 2.4H), 2.10 (s, 3H).  $^{13}\text{C NMR}$  (150 MHz,  $\text{CDCl}_3$ )  $\delta$  198.8, 195.9, 160.0, 154.2, 137.6, 136.1, 128.9, 128.7, 128.6, 128.0, 127.9, 127.7, 54.8, 50.9, 31.1, 27.0. IR (neat)  $\nu_{\text{max}}$  3331, 3063, 3029, 1699, 1614, 1357  $\text{cm}^{-1}$ . HRMS[ESI] calcd for  $\text{C}_{17}\text{H}_{19}\text{O}_2\text{N}_2$   $[\text{M}+\text{H}]^+$  283.1441, found 283.1437.

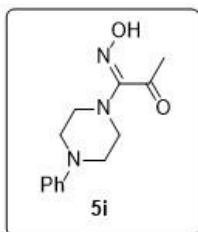

**(E)-1-(hydroxyimino)-1-(4-phenylpiperazin-1-yl)propan-2-one (5i);** The title compound was prepared according to the general procedure; 389 mg, 63%; white solid;  $R_f = 0.4$  (Hex:EtOAc = 3:1);  $^1\text{H NMR}$  (600 MHz,  $\text{CDCl}_3$ )  $\delta$  8.62 (br s, 1H), 7.29–7.27 (m, 2H), 6.96 (d,  $J = 7.9$  Hz, 2H), 6.90 (t,  $J = 7.3$  Hz, 1H), 3.43 (m, 4H), 3.24 (m, 4H), 2.39 (s, 3H).  $^{13}\text{C NMR}$  (150 MHz,  $\text{CDCl}_3$ )  $\delta$  195.6, 153.1, 151.5, 129.3, 120.4, 116.7, 50.2, 48.3, 27.4. IR (neat)  $\nu_{\text{max}}$  3299, 3234, 2842, 1697, 1636, 1263, 1152  $\text{cm}^{-1}$ . HRMS[ESI] calcd for  $\text{C}_{13}\text{H}_{18}\text{O}_2\text{N}_3$   $[\text{M}+\text{H}]^+$  248.1394, found 248.1390.

**(E)-1-(hydroxyimino)-1-(piperidin-1-yl)propan-2-one (5j);** The title compound was prepared according to the general procedure and purified with 5% MeOH in DCM; 310 mg, 67%; yellow solid;  $R_f = 0.4$  (10% MeOH in DCM);  $^1\text{H NMR}$  (600 MHz,  $\text{CDCl}_3$ )

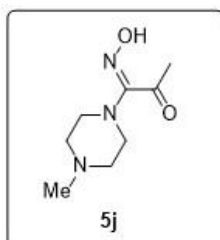

$\delta$  10.65 (br s, 1H), 3.36 (m, 4H), 2.53 (m, 4H), 2.34 (s, 3H), 2.32 (s, 3H).  $^{13}\text{C NMR}$  (150 MHz,  $\text{CDCl}_3$ )  $\delta$  196.3, 152.3, 55.5, 47.6, 46.2, 27.4. IR (neat)  $\nu_{\text{max}}$  3142, 2946, 2814, 1694, 1450, 1352  $\text{cm}^{-1}$ . HRMS[ESI] calcd for  $\text{C}_8\text{H}_{16}\text{O}_2\text{N}_3$   $[\text{M}+\text{H}]^+$  186.1237, found 186.1235.

**(E)-1-(hydroxyimino)-1-morpholinopropan-2-one (5k);** The title compound was prepared according to the general procedure; 280 mg, 65%; white solid;  $R_f = 0.3$  (Hex:EtOAc = 3:1);  $^1\text{H NMR}$  (600 MHz,  $\text{CDCl}_3$ )  $\delta$  8.91 (br s, 1H), 3.74–3.72 (m, 4H), 3.31–3.29 (m, 4H), 2.32 (s, 3H).  $^{13}\text{C NMR}$  (150 MHz,  $\text{CDCl}_3$ )  $\delta$  195.8, 152.0, 67.5, 48.6, 27.5. IR (neat)  $\nu_{\text{max}}$  3300, 2964, 2859, 1698, 1614, 1260  $\text{cm}^{-1}$ . HRMS[ESI] calcd for  $\text{C}_7\text{H}_{13}\text{O}_3\text{N}_2$   $[\text{M}+\text{H}]^+$  173.0921, found 173.0920.

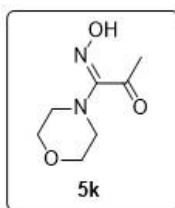

#### 4. 4) General Procedure for the synthesis of 7a–7k

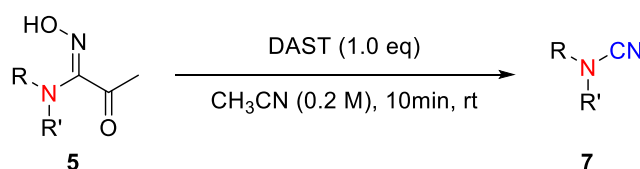

To a stirred solution of **5** (0.3 mmol) in  $\text{CH}_3\text{CN}$  (1 mL) was added (diethylamino)sulfur trifluoride (DAST, 0.04 mL, 0.3 mmol) at room temperature. After 10 min, the reaction mixture was quenched with sat.  $\text{NaHCO}_3$  sol'n (20 mL) and extracted with ethyl acetate (10 mL X 2). Then, the organic solution was dried over  $\text{MgSO}_4$ , filtered, concentrated, and subjected to silica gel column chromatography (Het:EtOAc = 5:1 or 3:1) to afford **7a–k**.

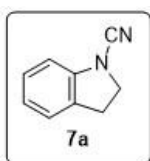

**Indoline-1-carbonitrile (7a);**<sup>5</sup> The title compound was prepared according to the general procedure; 31 mg, 72%; white solid;  $R_f = 0.4$  (Hex:EtOAc = 5:1);  $^1\text{H NMR}$  (600 MHz,  $\text{CDCl}_3$ )  $\delta$  7.22 (t,  $J = 7.6$  Hz, 1H), 7.17 (d,  $J = 7.4$  Hz, 1H), 7.01–6.97 (m, 2H), 4.05 (t,  $J = 8.6$  Hz, 2H), 3.20 (t,  $J = 8.5$  Hz, 2H). IR (neat)  $\nu_{\text{max}}$  3053, 2968, 2918, 2222, 1732, 1489  $\text{cm}^{-1}$ .

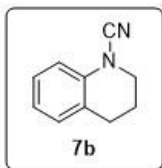

**3,4-dihydroquinoline-1(2H)-carbonitrile (7b);**<sup>5</sup> The title compound was prepared according to the general procedure; 36 mg, 76%; yellow oil;  $R_f = 0.5$  (Hex:EtOAc = 3:1);  $^1\text{H NMR}$  (600 MHz,  $\text{CDCl}_3$ )  $\delta$  7.22–7.17 (m, 2H), 7.07 (d,  $J = 7.6$  Hz, 1H), 6.97 (m, 1H), 3.75 (t,  $J = 5.7$  Hz, 2H), 2.80 (t,  $J = 6.3$  Hz, 2H), 2.04 (quint,  $J = 6.2$  Hz, 2H). IR (neat)  $\nu_{\text{max}}$  2940, 2889, 2216, 1588, 1496  $\text{cm}^{-1}$ .

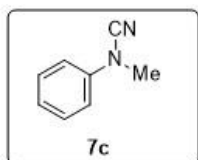

**N-methyl-N-phenylcyanamide (7c);**<sup>5</sup> The title compound was prepared according to the general procedure; 30 mg, 75%; yellow oil;  $R_f = 0.5$  (Hex:EtOAc = 3:1);  $^1\text{H NMR}$  (600 MHz,  $\text{CDCl}_3$ )  $\delta$  7.40–7.37 (m, 2H), 7.12–7.09 (m, 3H), 3.34 (s, 3H). IR (neat)  $\nu_{\text{max}}$  3046, 2920, 2222, 1599, 1499, 1113  $\text{cm}^{-1}$ .

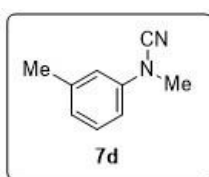

**N-methyl-N-(m-tolyl)cyanamide (7d);** The title compound was prepared according to the general procedure; 29 mg, 67%; white oil;  $R_f = 0.5$  (Hex:EtOAc = 5:1);  $^1\text{H NMR}$  (600 MHz,  $\text{CDCl}_3$ )  $\delta$  7.25 (t,  $J = 4.4$  Hz, 1H), 6.92–6.86 (m, 3H), 3.32 (s, 3H), 2.37 (s, 3H).  $^{13}\text{C NMR}$  (150 MHz,  $\text{CDCl}_3$ )  $\delta$  140.4, 140.0, 129.5, 124.3, 115.8, 114.4, 112.0, 36.9, 21.7. IR (neat)  $\nu_{\text{max}}$  2918, 2846, 2222, 1606, 1477  $\text{cm}^{-1}$ . HRMS[ESI] calcd for  $\text{C}_9\text{H}_{11}\text{N}_2$   $[\text{M}+\text{H}]^+$  147.0917, found 147.0915.

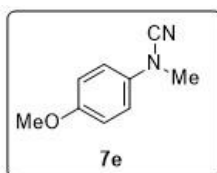

**N-(4-methoxyphenyl)-N-methylcyanamide (7e);** The title compound was prepared according to the general procedure; 44 mg, 91%; white solid;  $R_f = 0.5$  (Hex:EtOAc = 3:1);  $^1\text{H NMR}$  (600 MHz,  $\text{CDCl}_3$ )  $\delta$  7.03–6.99 (m, 2H), 6.91–6.89 (m, 2H), 3.78 (s, 3H), 3.29 (s, 3H).  $^{13}\text{C NMR}$  (150 MHz,  $\text{CDCl}_3$ )  $\delta$  156.1, 133.9, 116.6, 114.99, 114.96, 55.7, 37.4. IR (neat)  $\nu_{\text{max}}$  2961, 2836, 2221, 1512, 1116, 1035  $\text{cm}^{-1}$ . HRMS[ESI] calcd for  $\text{C}_9\text{H}_{11}\text{ON}_2$   $[\text{M}+\text{H}]^+$  163.0866, found 163.0864.

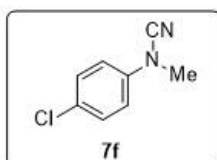

**N-(4-chlorophenyl)-N-methylcyanamide (7f);**<sup>6</sup> The title compound was prepared according to the general procedure; 37 mg, 75%; yellow solid;  $R_f = 0.5$  (Hex:EtOAc = 5:1);  $^1\text{H NMR}$  (600 MHz, Acetone- $d_6$ )  $\delta$  7.46–7.44 (m, 2H), 7.19–7.17 (m, 2H), 3.40 (s, 3H). IR (neat)  $\nu_{\text{max}}$  2924, 2227, 1495, 1336, 1119  $\text{cm}^{-1}$ .

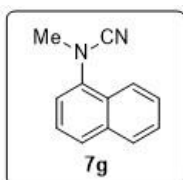

**N-methyl-N-(naphthalen-1-yl)cyanamide (7g);** The title compound was prepared according to the general procedure; 35 mg, 64%; yellow solid;  $R_f = 0.2$  (Hex:EtOAc = 3:1);  $^1\text{H NMR}$  (300 MHz,  $\text{CDCl}_3$ )  $\delta$  8.16 (m, 1H), 7.91 (dd,  $J = 8.0, 0.7$  Hz, 1H), 7.82 (dd,  $J = 6.6, 2.5$  Hz, 1H), 7.63 (m, 1H), 7.58 (m, 1H), 7.54–7.47 (m, 2H), 3.45 (s, 3H).  $^{13}\text{C NMR}$  (150 MHz,  $\text{CDCl}_3$ )  $\delta$  138.0, 134.8, 128.8, 128.4, 128.1, 127.3, 126.9, 125.6, 122.2, 121.2, 117.3, 42.4. IR (neat)  $\nu_{\text{max}}$  2916, 2215, 1596, 1575, 1395  $\text{cm}^{-1}$ . HRMS[ESI] calcd for  $\text{C}_{12}\text{H}_{11}\text{N}_2$   $[\text{M}+\text{H}]^+$  183.0917, found 183.0916.

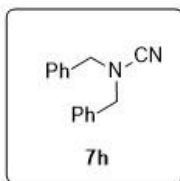

**N,N-dibenzylcyanamide (7h);**<sup>7</sup> The title compound was prepared according to the general procedure; 35 mg, 53%; white solid;  $R_f = 0.3$  (Hex:EtOAc = 5:1);  $^1\text{H NMR}$  (600 MHz,  $\text{CDCl}_3$ )  $\delta$  7.41–7.35 (m, 6H), 7.31 (d,  $J = 6.8$  Hz, 4H), 4.12 (s, 4H). IR (neat)  $\nu_{\text{max}}$  3031, 2921, 2208, 1496, 1454  $\text{cm}^{-1}$ .

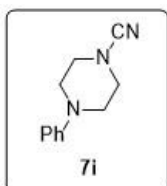

**4-phenylpiperazine-1-carbonitrile (7i);**<sup>5</sup> The title compound was prepared according to the general procedure; 34 mg, 60%; white oil;  $R_f = 0.5$  (Hex:EtOAc = 3:1);  $^1\text{H NMR}$  (600 MHz,  $\text{CDCl}_3$ )  $\delta$  7.29 (dd,  $J = 8.3, 7.6$  Hz, 2H), 6.94 (t,  $J = 7.3$  Hz, 1H), 6.92 (d,  $J = 8.1$  Hz, 2H), 3.41–3.39 (m, 4H), 3.25–3.23 (m, 4H). IR (neat)  $\nu_{\text{max}}$  2917, 2828, 2213, 1598, 1495  $\text{cm}^{-1}$ .

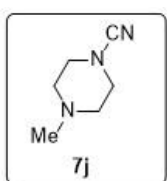

**Piperidine-1-carbonitrile (7j);**<sup>8</sup> The title compound was prepared according to the general procedure; 12 mg, 33%; yellow solid;  $R_f = 0.7$  (10% MeOH in DCM);  $^1\text{H NMR}$  (300 MHz,  $\text{CDCl}_3$ )  $\delta$  3.27–3.24 (m, 4H), 2.48–2.45 (m, 4H), 2.31 (s, 3H). IR (neat)  $\nu_{\text{max}}$  2924, 2851, 2221, 1469, 1374  $\text{cm}^{-1}$ .

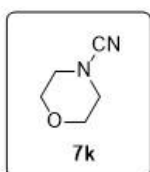

**Morpholine-4-carbonitrile (7k);**<sup>7</sup> The title compound was prepared according to the general procedure; 12 mg, 35%; white solid;  $R_f = 0.5$  (Hex:EtOAc = 1:1);  $^1\text{H NMR}$  (600 MHz,  $\text{CDCl}_3$ )  $\delta$  3.75–3.74 (m, 4H), 3.25–3.24 (m, 4H). IR (neat)  $\nu_{\text{max}}$  2968, 2922, 2860, 2215, 1454, 1262  $\text{cm}^{-1}$ .

#### 4.5) Procedure for preparation of 9

The known compounds **8** were prepared by the known procedures and not characterized.<sup>9</sup>

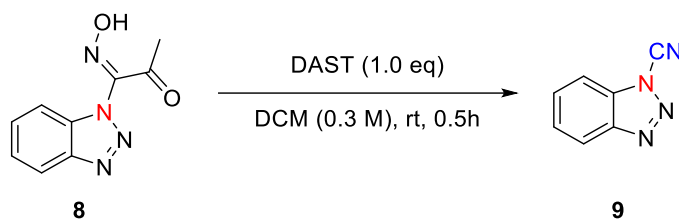

To a stirred solution of **8** (204 mg, 1 mmol) in DCM (3.3 mL) was added (diethylamino)sulfur trifluoride (DAST, 0.13 mL, 1 mmol) at room temperature. After 2h, the reaction mixture was quenched with sat.  $\text{NaHCO}_3$  sol'n (40 mL) and extracted with ethyl acetate (20 mL X 2). Then, the organic solution was dried over  $\text{MgSO}_4$ , filtered, concentrated, and subjected to silica gel column chromatography (Hex:EtOAc = 10:1) to afford **9**.

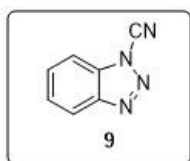

**1H-benzo[d][1,2,3]triazole-1-carbonitrile (9);**<sup>10</sup> 79 mg, 55%; white solid;  $R_f = 0.6$  (Hex : EtOAc = 3:1);  $^1\text{H NMR}$  (600 MHz,  $\text{CDCl}_3$ )  $\delta$  8.23 (d,  $J = 8.3$  Hz, 2H), 7.80–7.78 (m, 2H), 7.61 (m, 1H).  $^{13}\text{C NMR}$  (150 MHz,  $\text{CDCl}_3$ )  $\delta$  143.6, 132.9, 131.8, 127.0, 121.7, 109.7, 103.9. IR (neat)  $\nu_{\text{max}}$  3096, 2917, 2254, 1484, 1454  $\text{cm}^{-1}$ .

#### 4.6) Procedure for preparation of 11

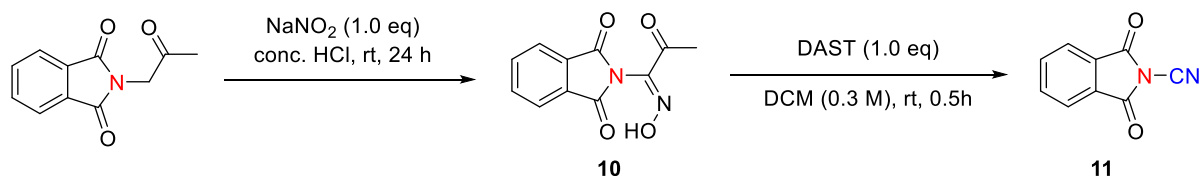

Step 1: A 40 mL vial was charged with 2-(2-oxopropyl)isoindoline-1,3-dione (1.22 g, 6.0 mmol) and conc. HCl (12 mL). Then, sodium nitrite (1.04 g, 15 mmol) was added to the reaction mixture at room temperature, and the vial was capped. After stirring for 24 h, the reaction mixture was poured onto ice water, and the resulting white solid was filtered, dried, and purified by silica gel column chromatography (Hex:EtOAc = 5:1 to 1:1) to afford **10**.

Step 2: To a stirred solution of **8** (232 mg, 1 mmol) in DCM (3.3 mL) was added (diethylamino)sulfur trifluoride (DAST, 0.13 mL, 1 mmol) at room temperature. After 2h, the reaction mixture was quenched with sat.  $\text{NaHCO}_3$  sol'n (40 mL) and extracted with ethyl acetate (20 mL X 2). Then, the organic solution was dried over  $\text{MgSO}_4$ , filtered, concentrated, and subjected to silica gel column chromatography (Hex:EtOAc = 5:1 to 1:1) to afford **11**.

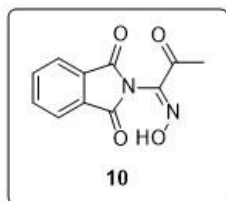

**(Z)-2-(1-(hydroxyimino)-2-oxopropyl)isoindoline-1,3-dione (10)**; 390mg, 28%; white solid ;  $R_f = 0.5$  (Hex:EtOAc = 1:1);  $^1\text{H}$  NMR (300 MHz,  $\text{CDCl}_3$ )  $\delta$  9.21 (br s, 1H), 7.94-7.91 (m, 2H), 7.80-7.77 (m, 2H), 2.55 (s, 3H).  $^{13}\text{C}$  NMR (150 MHz,  $\text{CDCl}_3$ )  $\delta$  190.5, 168.1, 165.1, 141.5, 134.8, 134.6, 132.7, 132.1, 124.3, 123.8, 25.6. IR (neat)  $\nu_{\text{max}}$  3289, 3031, 2929, 1774, 1715, 1417  $\text{cm}^{-1}$ . HRMS[ESI] calcd for  $\text{C}_{11}\text{H}_8\text{O}_4\text{N}_2\text{Na}$   $[\text{M}+\text{Na}]^+$  255.0376, found 255.0368.

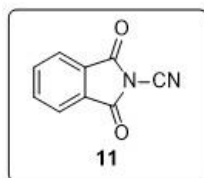

**1,3-dioxoisoindoline-2-carbonitrile (11)**;<sup>11</sup> 103mg, 60%; white solid;  $R_f = 0.4$  (Hex:EtOAc = 2:1);  $^1\text{H}$  NMR (300 MHz,  $\text{DMSO}-d_6$ )  $\delta$  8.10–8.06 (m, 2H), 8.04–7.99 (m, 2H).  $^{13}\text{C}$  NMR (75 MHz,  $\text{DMSO}-d_6$ )  $\delta$  162.6, 136.3, 130.8, 125.0, 102.9. IR (neat)  $\nu_{\text{max}}$  2919, 2846, 2252, 1749, 1353  $\text{cm}^{-1}$ .

#### 4.7) Procedure for preparation of 13

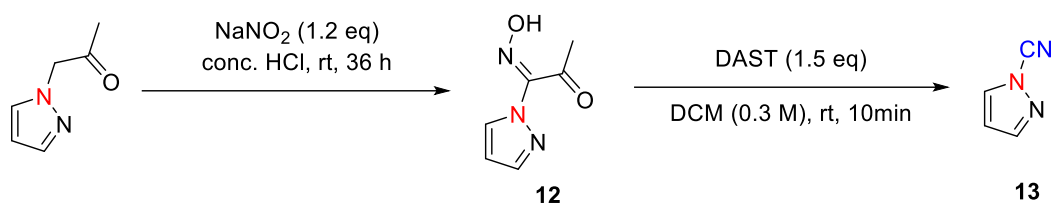

Step 1: To a stirred suspension of 1-(1H-pyrazol-1-yl)propan-2-one (3.32 g, 26.7 mmol) in conc. HCl (64.1 mL) was added sodium nitrite (2.21 g, 32.1 mmol) at room temperature. After stirring for 36 h, the reaction mixture was neutralized with 2M NaOH until pH becomes to 6-7 and extracted with ethyl acetate (100 mL X 3). Then, the organic solution was dried over  $\text{MgSO}_4$ , filtered, concentrated, and subjected to silica gel column chromatography (Hex:EtOAc = 3:1) to afford **12**.

Step 2: To a stirred solution of **12** (153 mg, 1.0 mmol) in DCM (3.3 mL) was added (diethylamino)sulfur trifluoride (DAST, 0.79 mL, 6.0 mmol) at room temperature. After 10min, the reaction mixture was diluted with diethyl ether (30 mL). Then, the organic solution was washed with 1N HCl sol'n (20 mL) and then neutralized with sat.  $\text{NaHCO}_3$  sol'n (40 mL). Then, the organic solution was dried over  $\text{MgSO}_4$ , filtered, concentrated to afford **13** in analytically pure form. Its separation by column chromatography was unsuccessful due to hydrolysis of **13** into 1H-pyrazole-1-carboxamide.

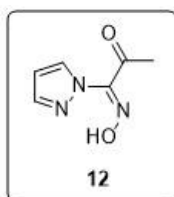

**(E)-1-(hydroxyimino)-1-(1H-pyrazol-1-yl)propan-2-one (12)**; 2.45g, 60%; white solid;  $R_f$  = 0.3 (Hex:EtOAc = 3:1);  $^1\text{H}$  NMR (600 MHz,  $\text{DMSO}-d_6$ )  $\delta$  13.0 (br s), 7.93 (d,  $J$  = 2.5 Hz, 1H), 7.69 (d,  $J$  = 1.6 Hz, 1H), 6.45 (dd,  $J$  = 2.3, 1.9 Hz, 1H), 2.46 (s, 3H).  $^{13}\text{C}$  NMR (150 MHz,  $\text{DMSO}-d_6$ )  $\delta$  191.3, 144.3, 140.3, 132.6, 106.1, 26.4. IR (neat)  $\nu_{\text{max}}$  3386, 3042, 1704, 1521, 1410, 1333  $\text{cm}^{-1}$ . HRMS[ESI] calcd for  $\text{C}_6\text{H}_8\text{O}_2\text{N}_3$   $[\text{M}+\text{H}]^+$  154.0611, found 154.0608.

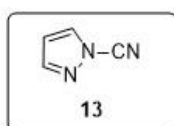

**1H-pyrazole-1-carbonitrile (13)**; 79 mg, 85%; yellow oil;  $R_f$  = 0.5 (Hex:EtOAc = 3:1);  $^1\text{H}$  NMR (300 MHz,  $\text{CDCl}_3$ )  $\delta$  7.88 (d,  $J$  = 2.8 Hz, 1H), 7.83 (d,  $J$  = 1.4 Hz, 1H), 6.50 (dd,  $J$  = 2.7, 1.8 Hz, 1H).  $^{13}\text{C}$  NMR (150 MHz,  $\text{CDCl}_3$ )  $\delta$  145.9, 134.7, 109.7, 106.8. IR (neat)  $\nu_{\text{max}}$  3133, 2918, 2261, 1390  $\text{cm}^{-1}$ . HRMS[ESI] calcd for  $\text{C}_4\text{H}_4\text{N}_3$   $[\text{M}+\text{H}]^+$  94.0400, found 94.0401.

## 5. $^1\text{H-NMR}$ , $^{13}\text{C-NMR}$ , $^{19}\text{F-NMR}$

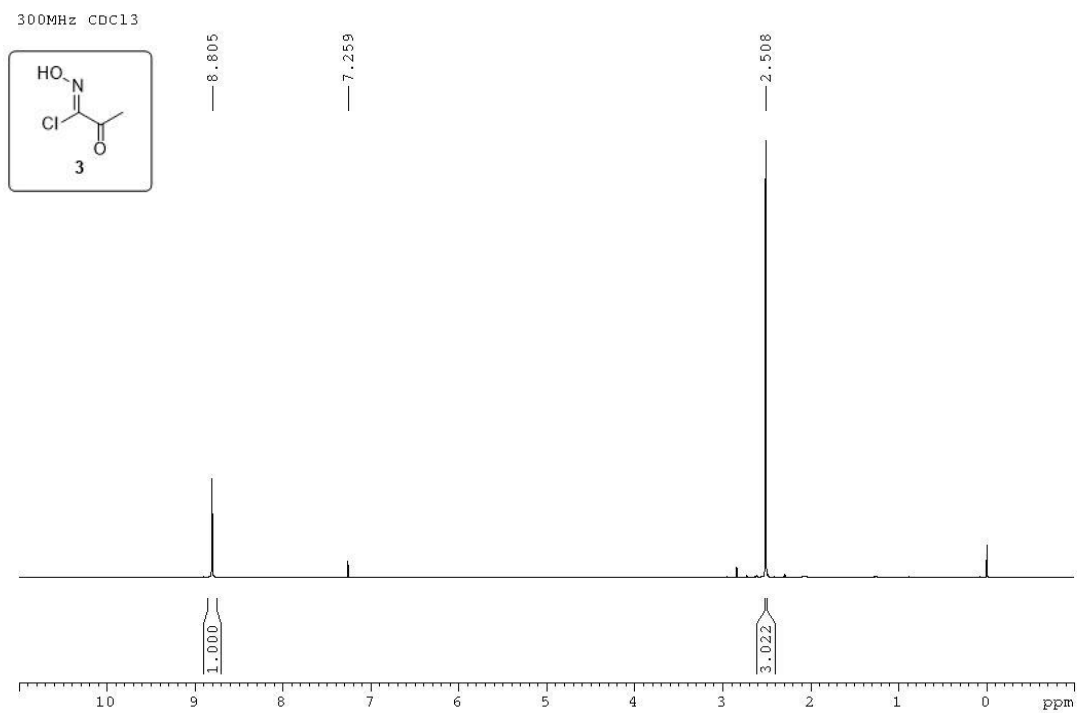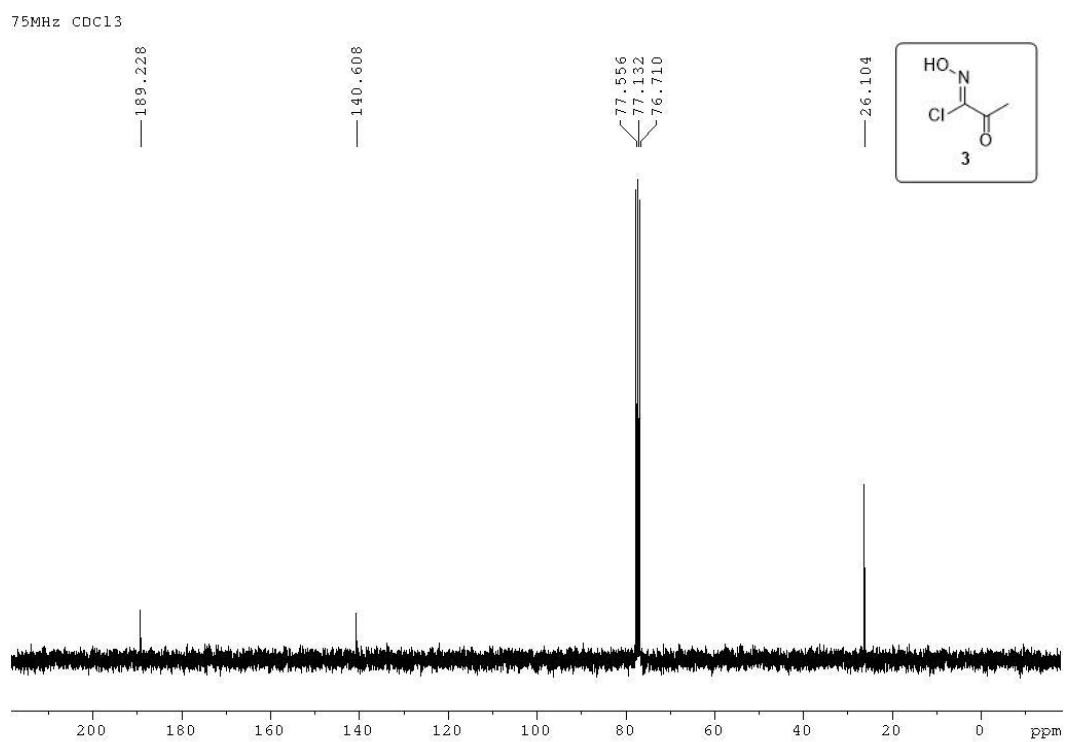

300MHz CDCl<sub>3</sub>

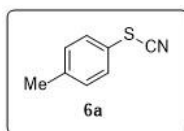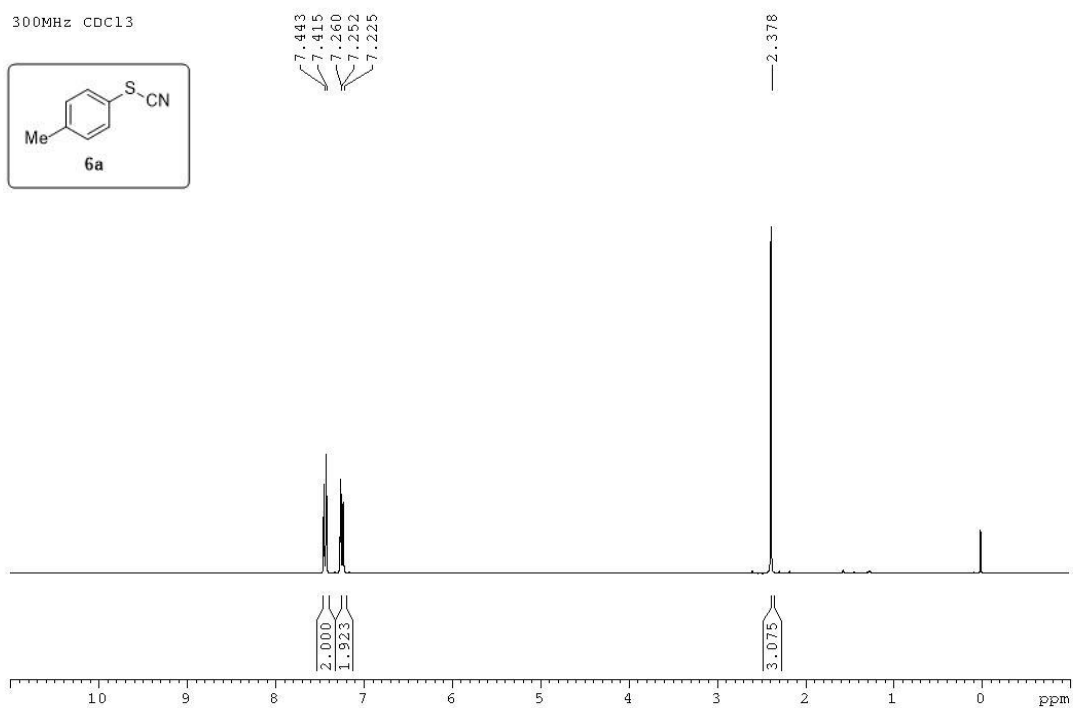

600MHz CDCl<sub>3</sub>

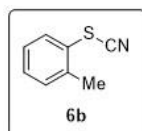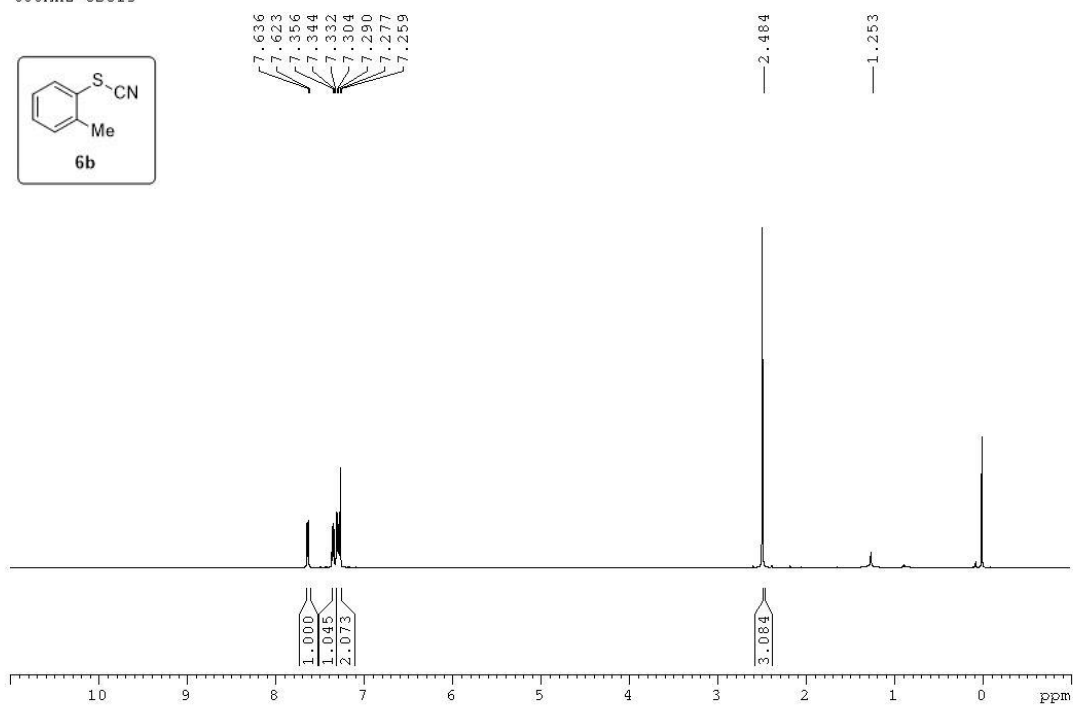



600MHz CDCl<sub>3</sub>

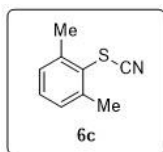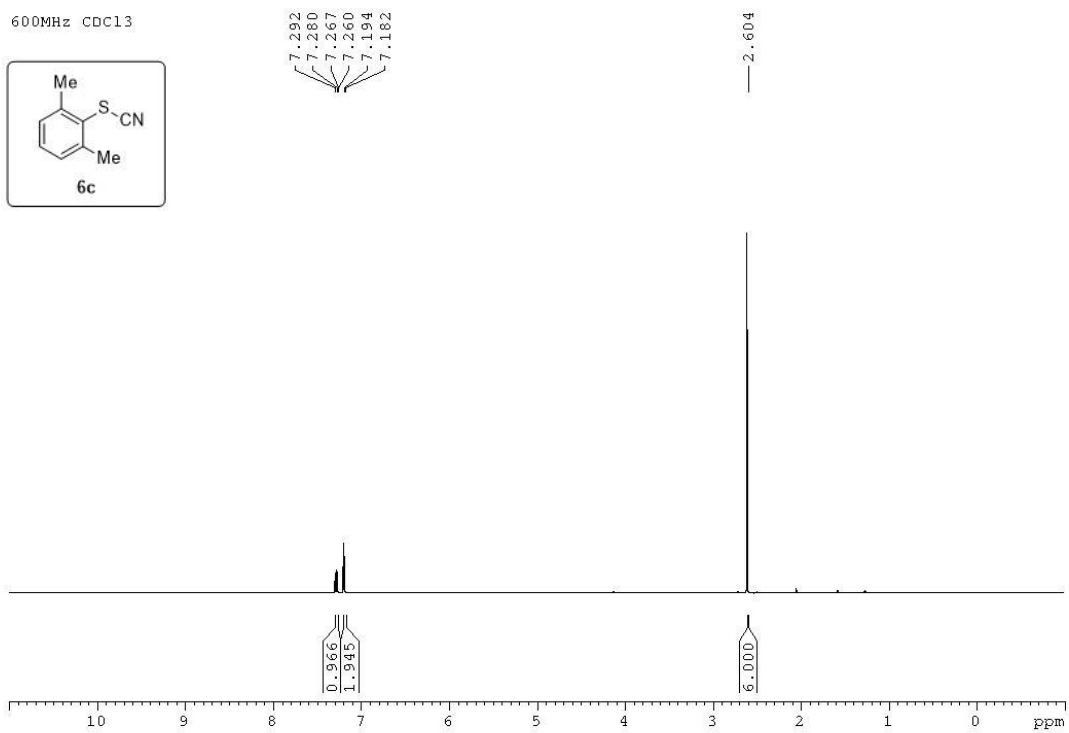

300MHz CDCl<sub>3</sub>

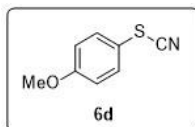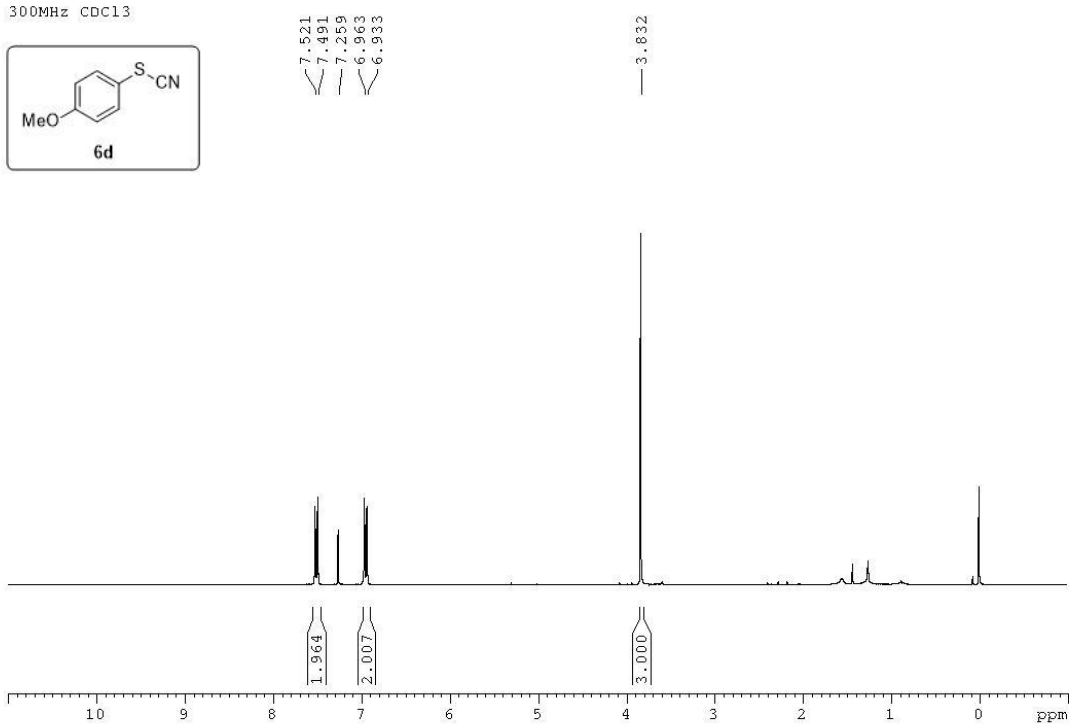

600MHz CDCl<sub>3</sub>

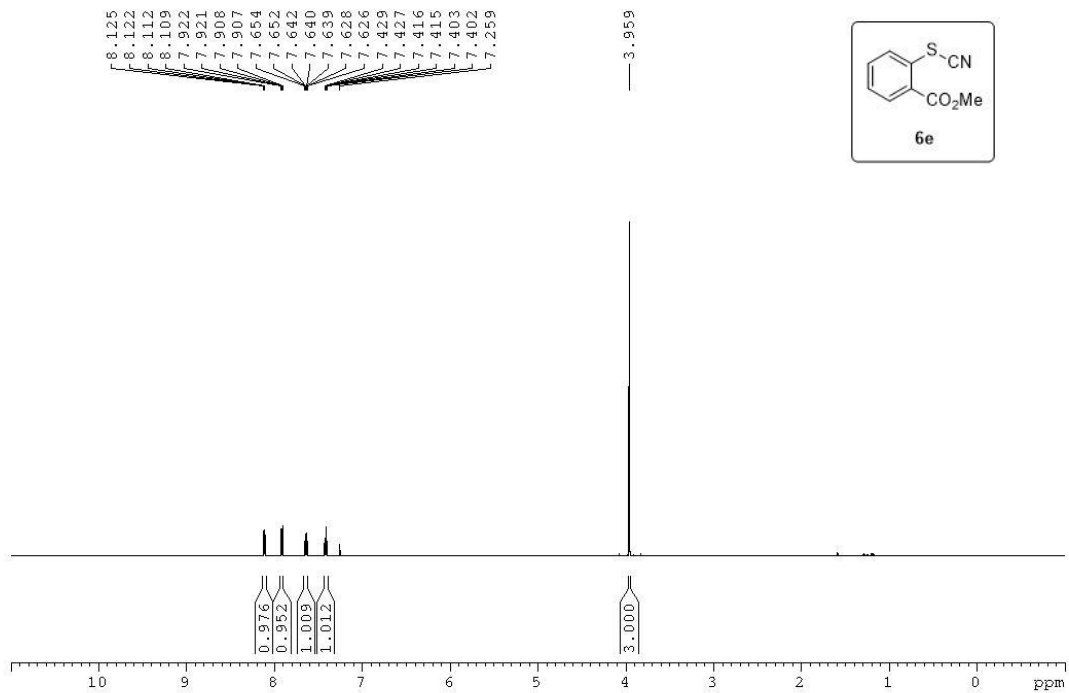

600MHz CDCl<sub>3</sub>

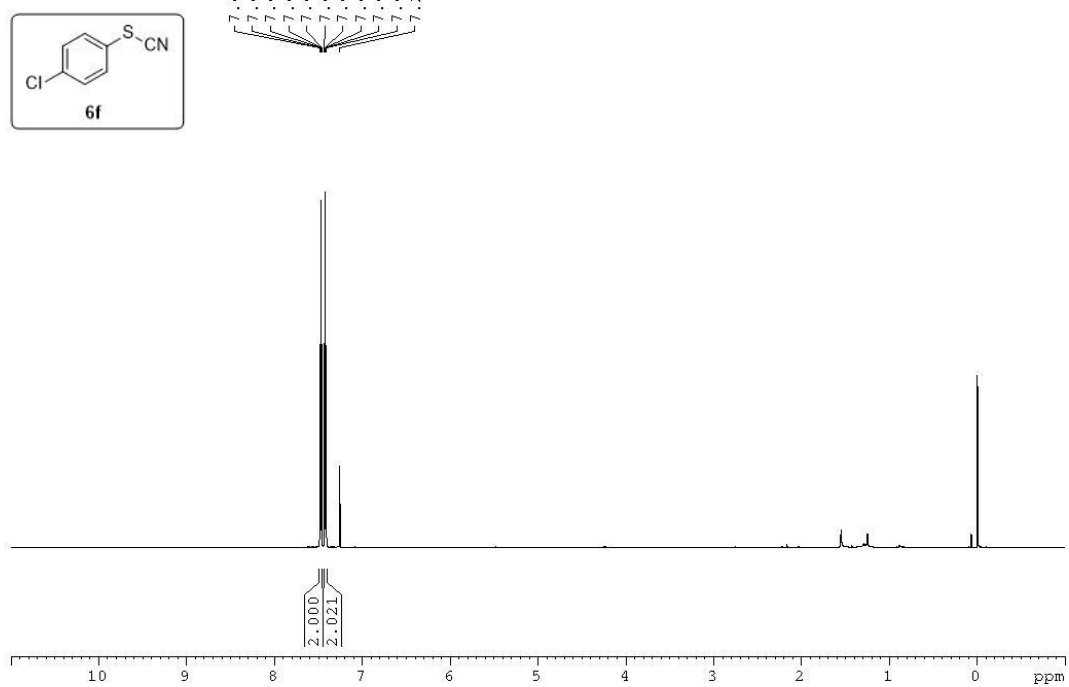

600MHz CDCl<sub>3</sub>

8.312  
8.297  
7.678  
7.663  
7.258

1.552

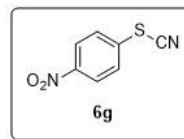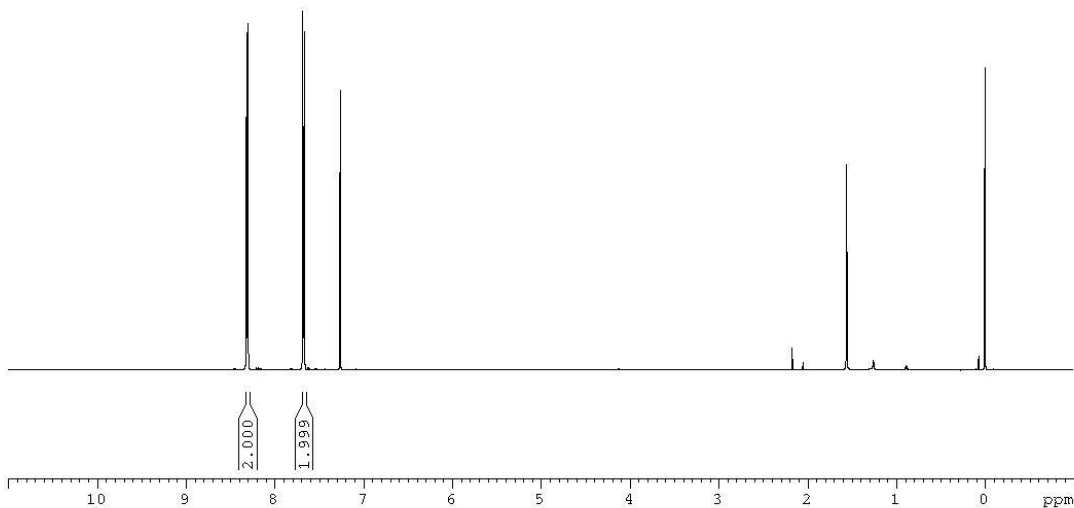

600MHz CDCl<sub>3</sub>

7.346  
7.334  
7.331  
7.322  
7.318  
7.315  
7.306  
7.303  
7.291

7.346  
7.334  
7.331  
7.322  
7.318  
7.315  
7.306  
7.303  
7.291  
7.259

1.554

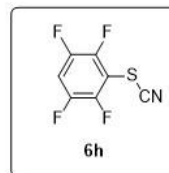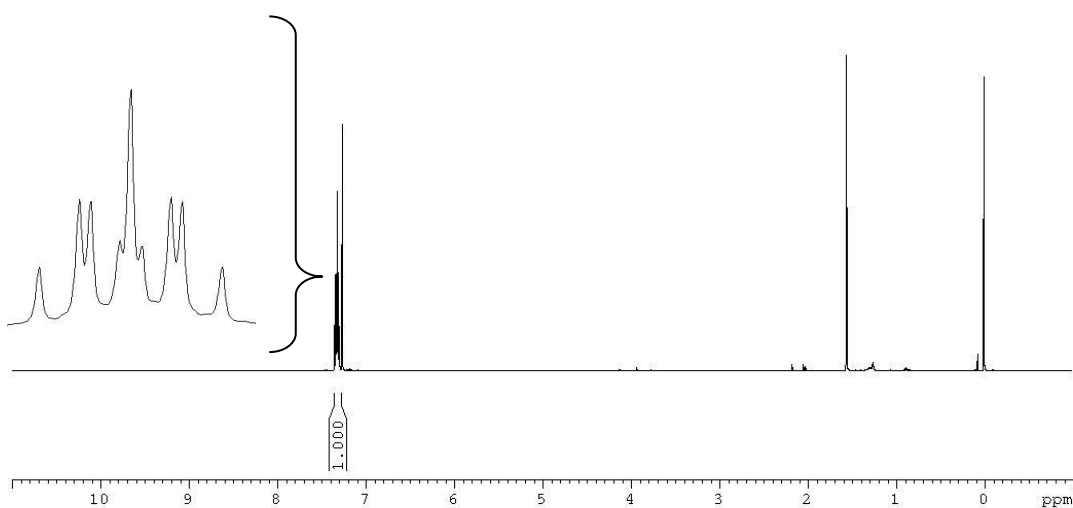

565MHz CDCl3

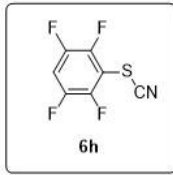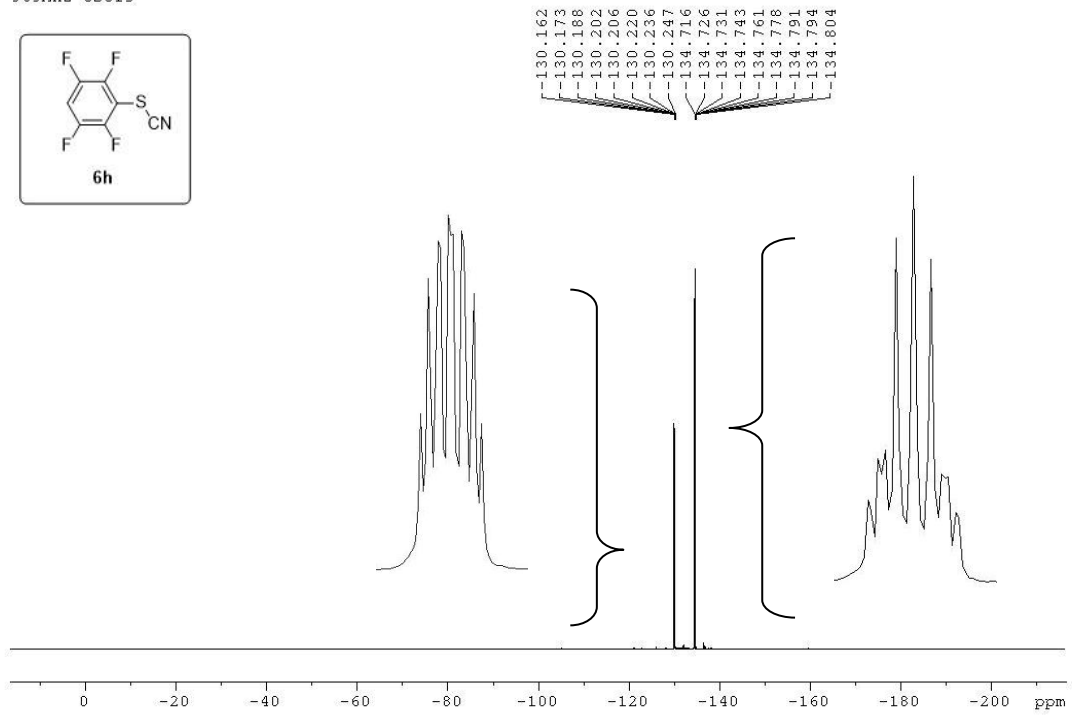

300MHz CDCl3

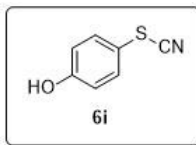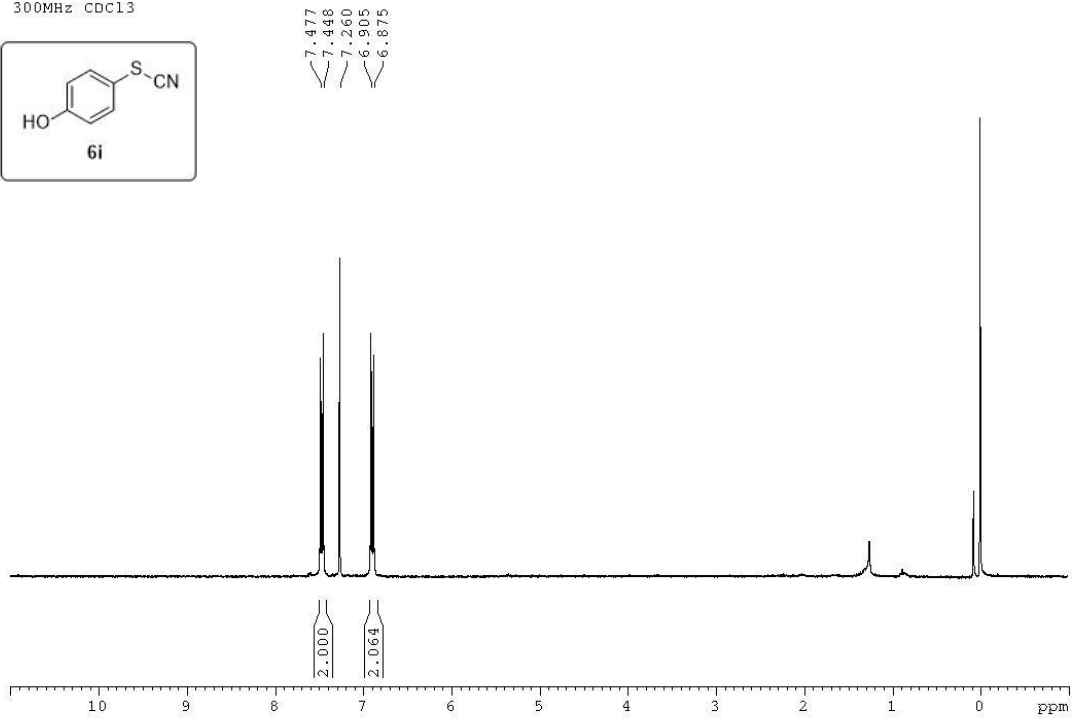

600MHz CDCl<sub>3</sub>

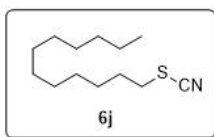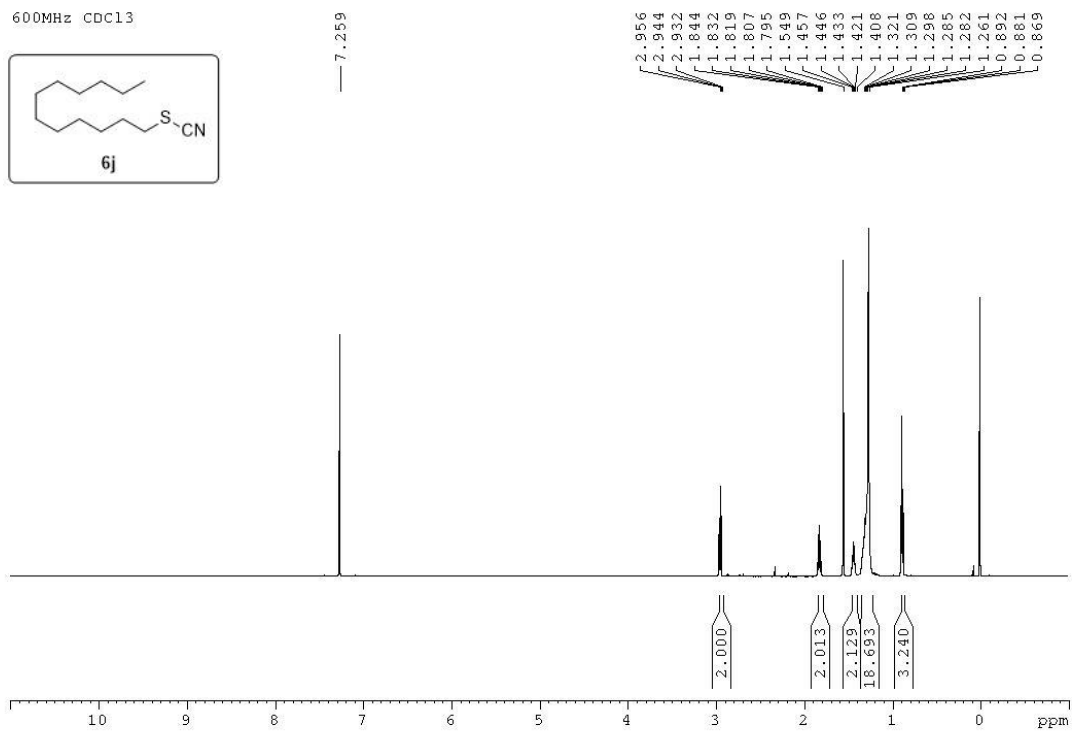

600MHz CDCl<sub>3</sub>

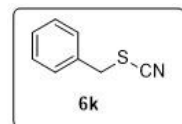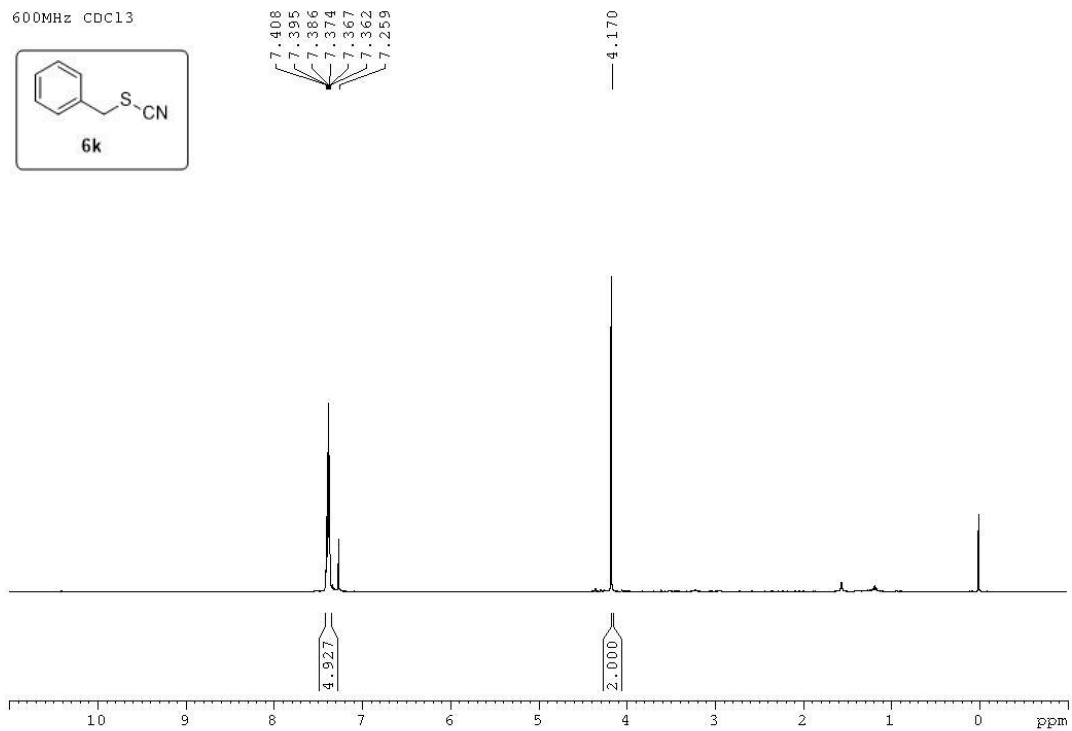

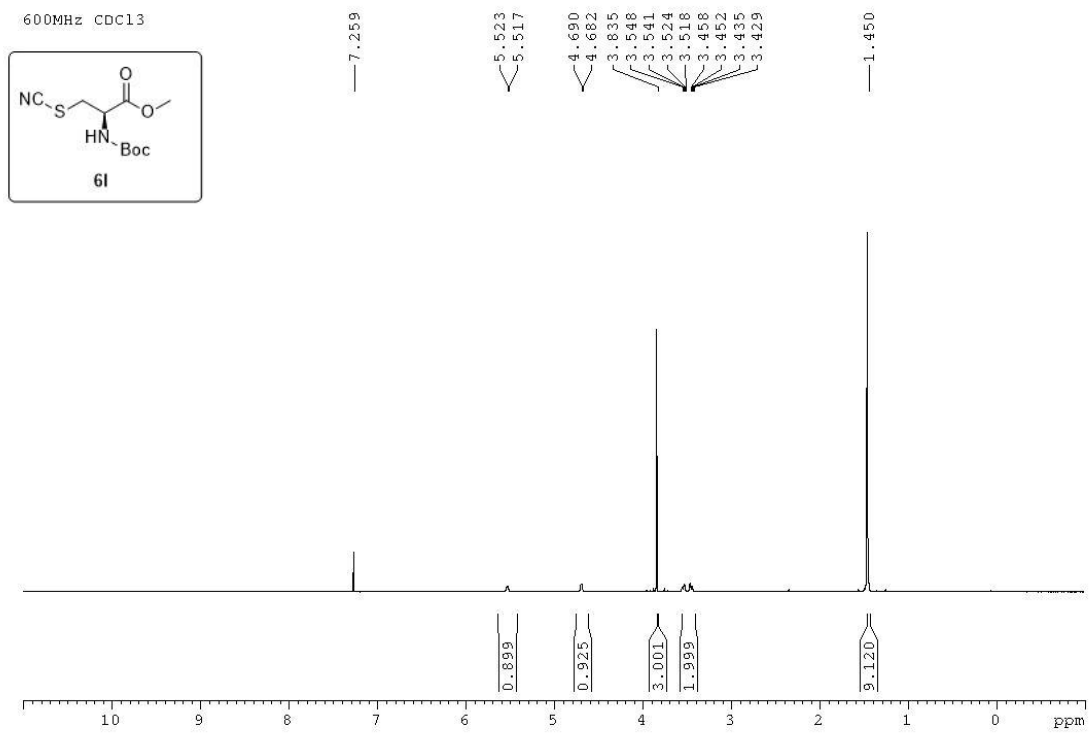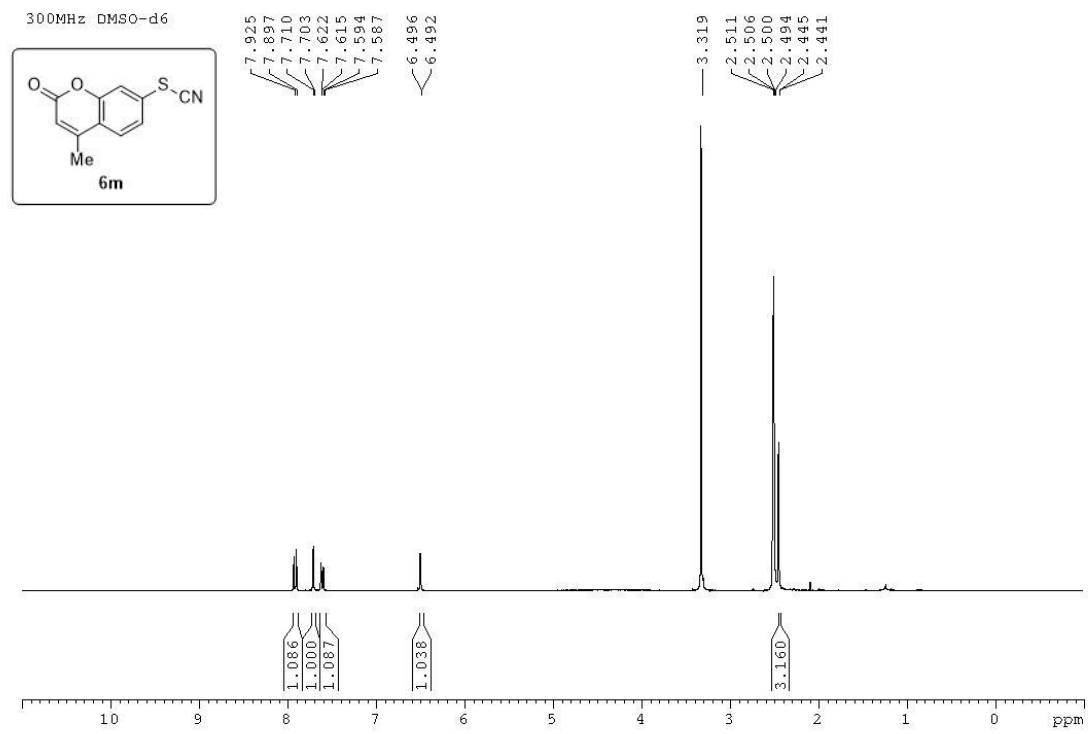

600MHz CDCl<sub>3</sub>

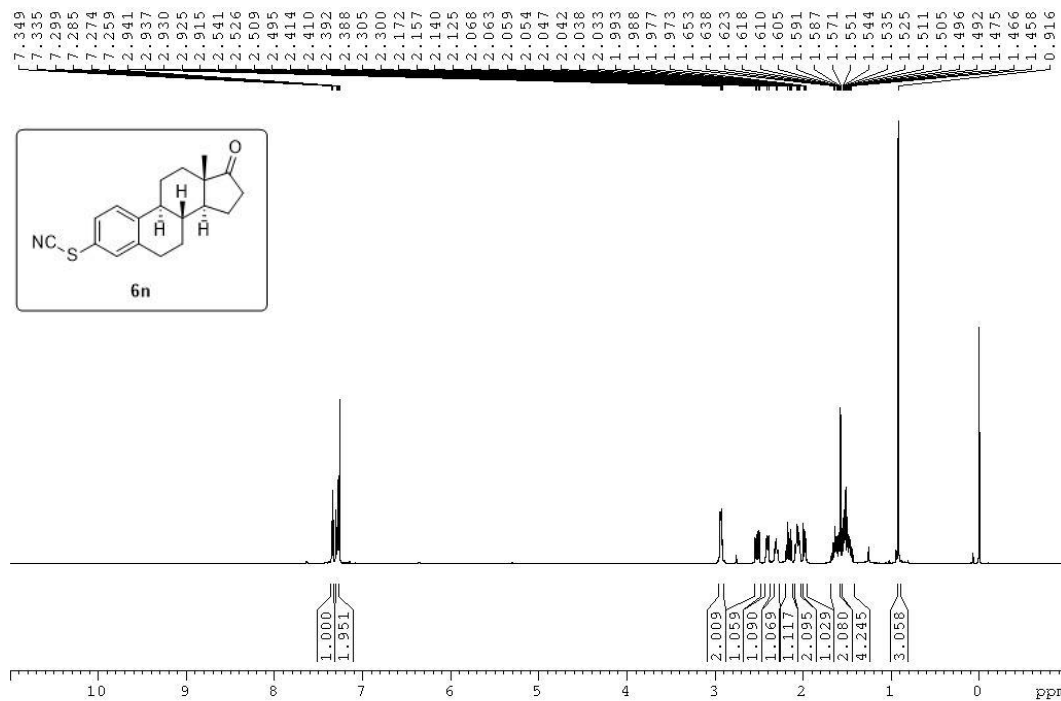

150MHz CDCl<sub>3</sub>

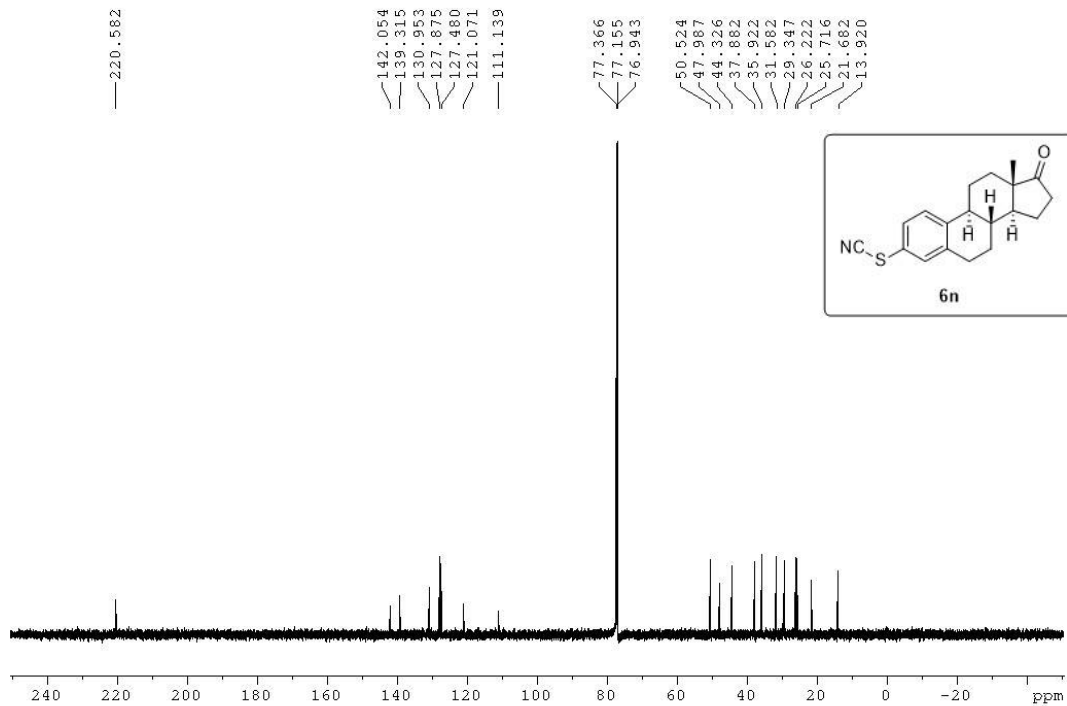

600MHz CDCl<sub>3</sub>

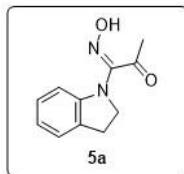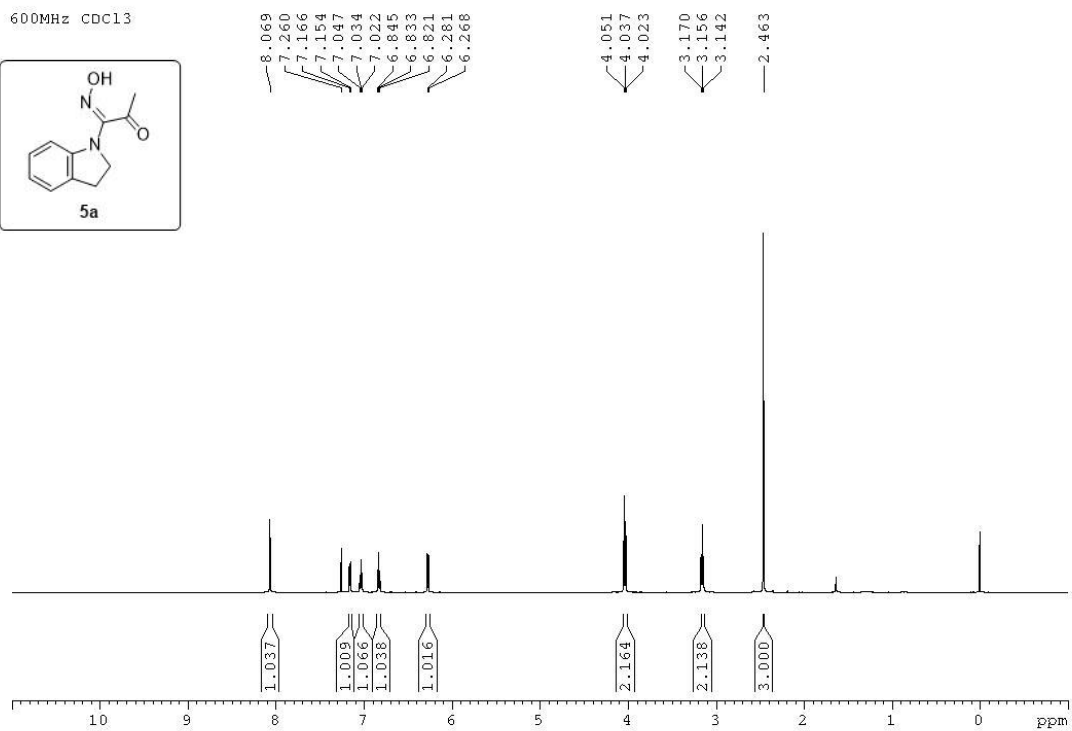

150MHz CDCl<sub>3</sub>

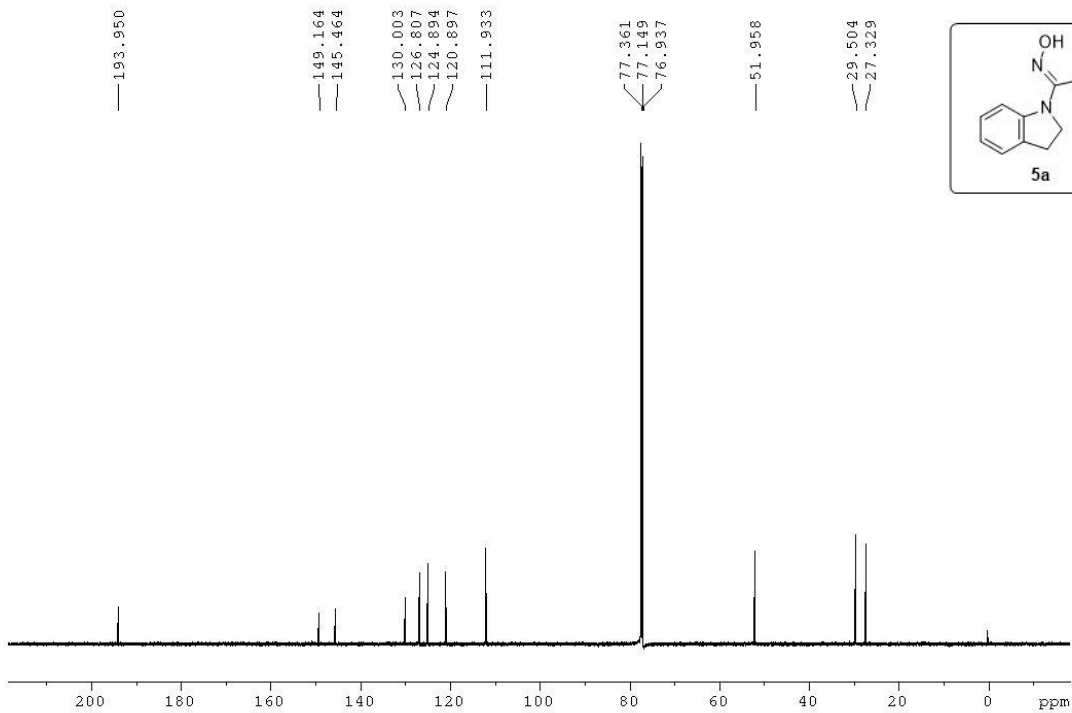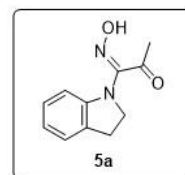





600MHz CDCl<sub>3</sub>

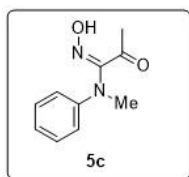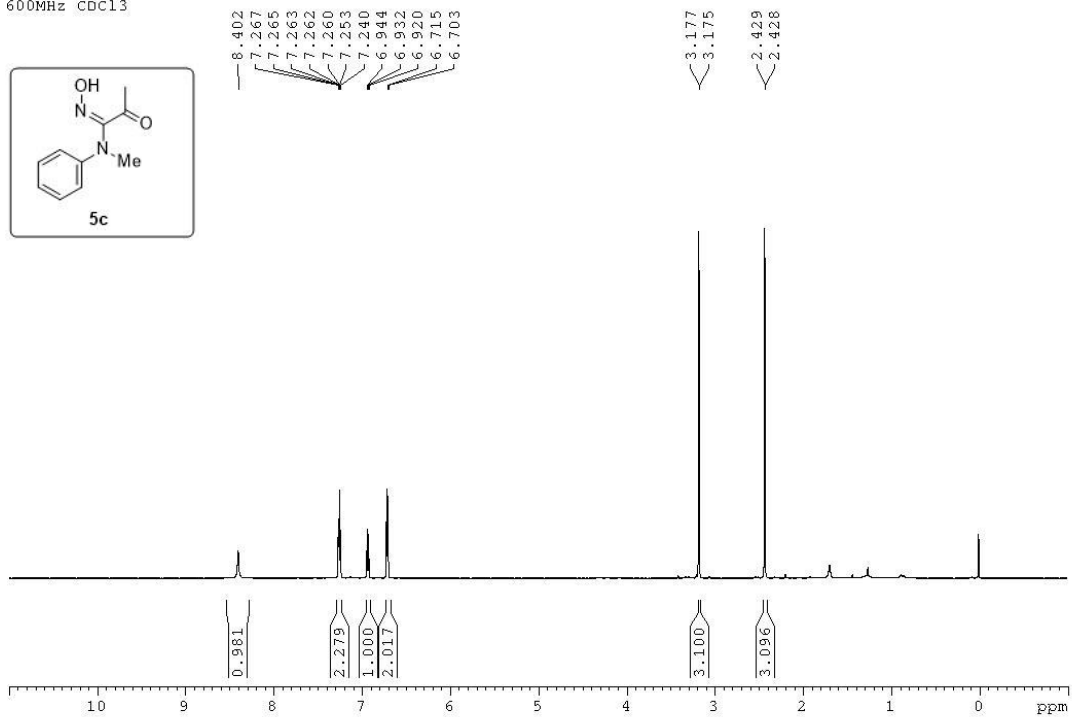

150MHz CDCl<sub>3</sub>

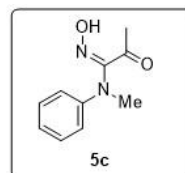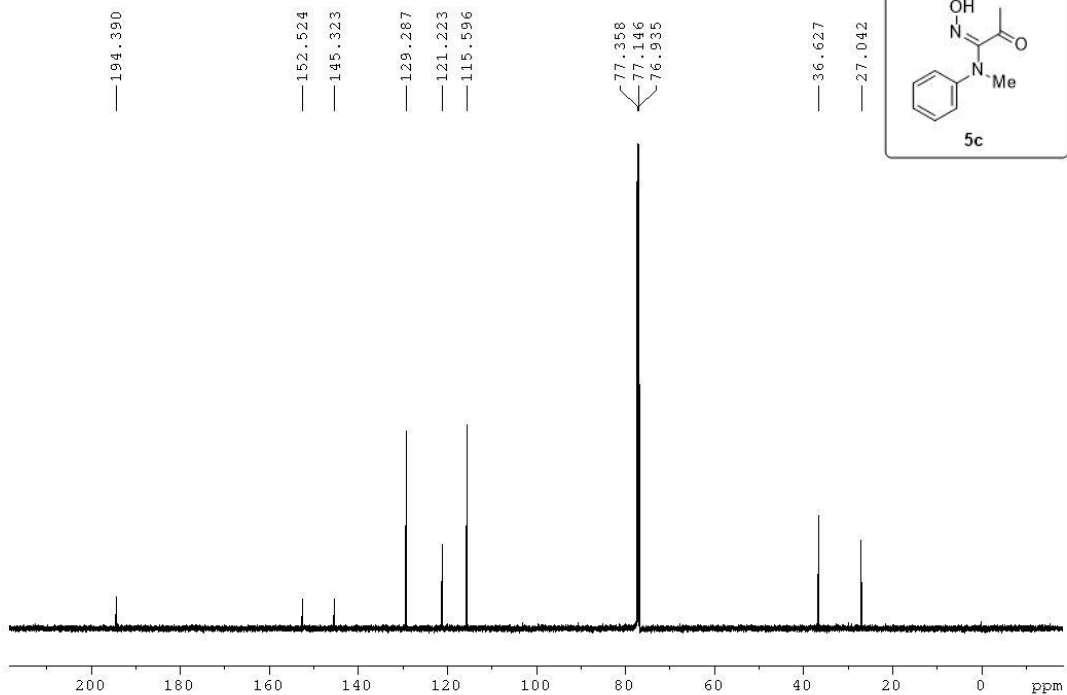

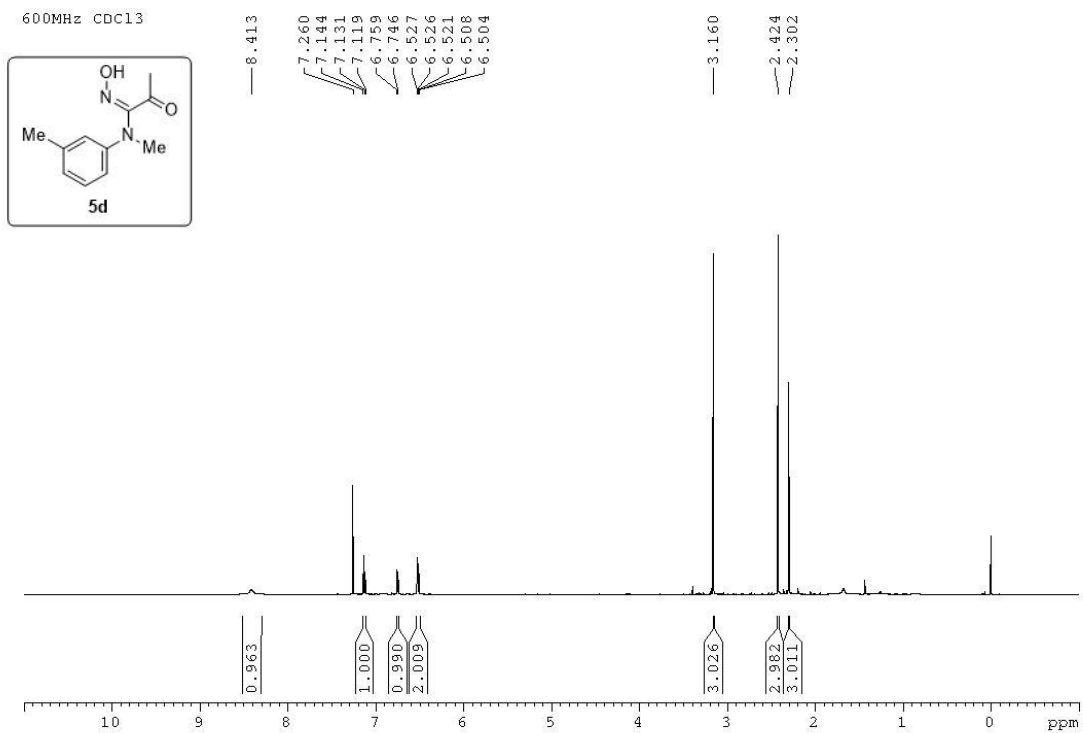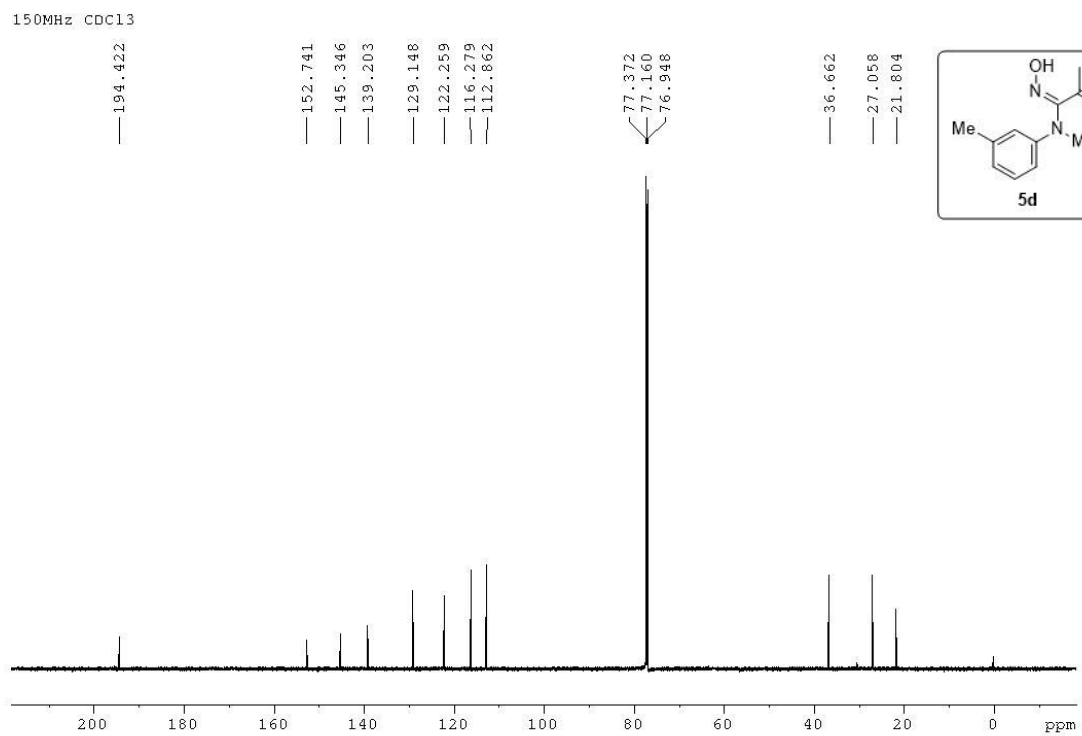

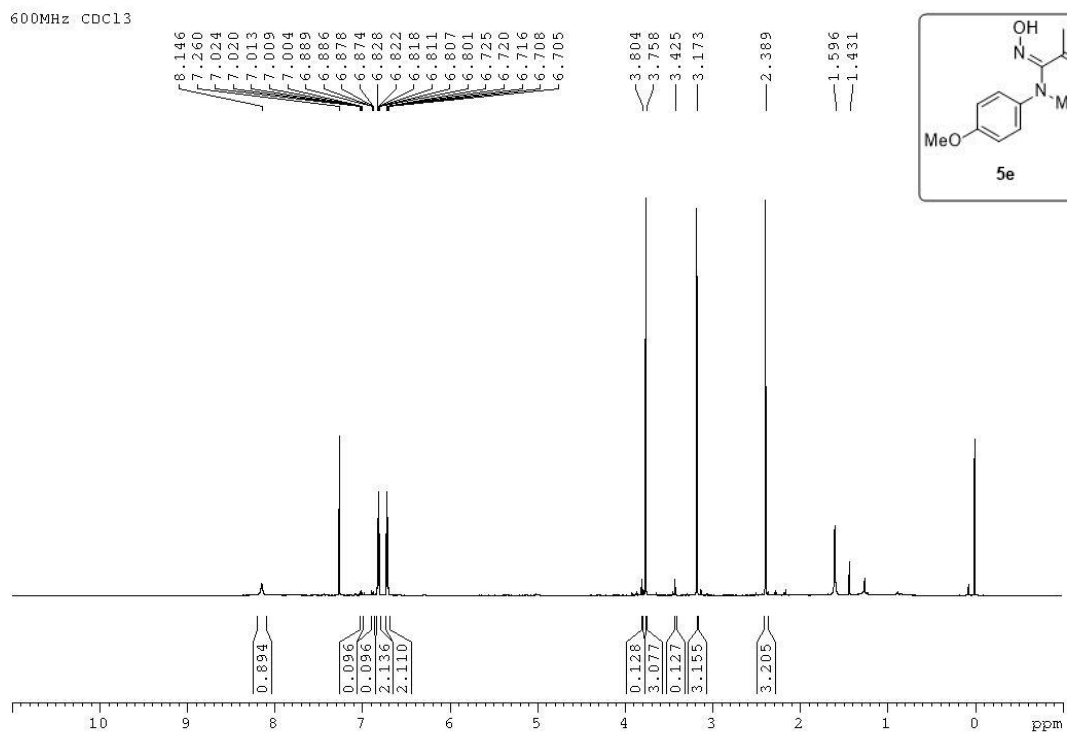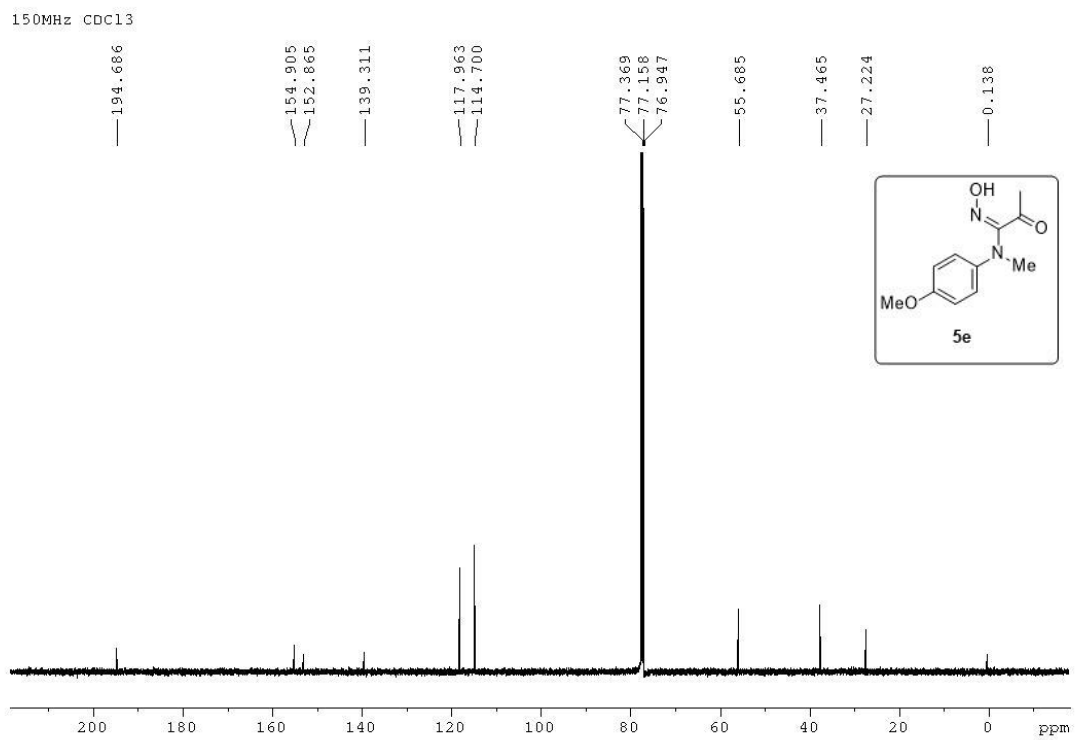

300MHz CDCl<sub>3</sub>

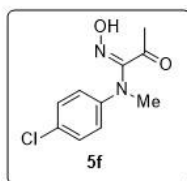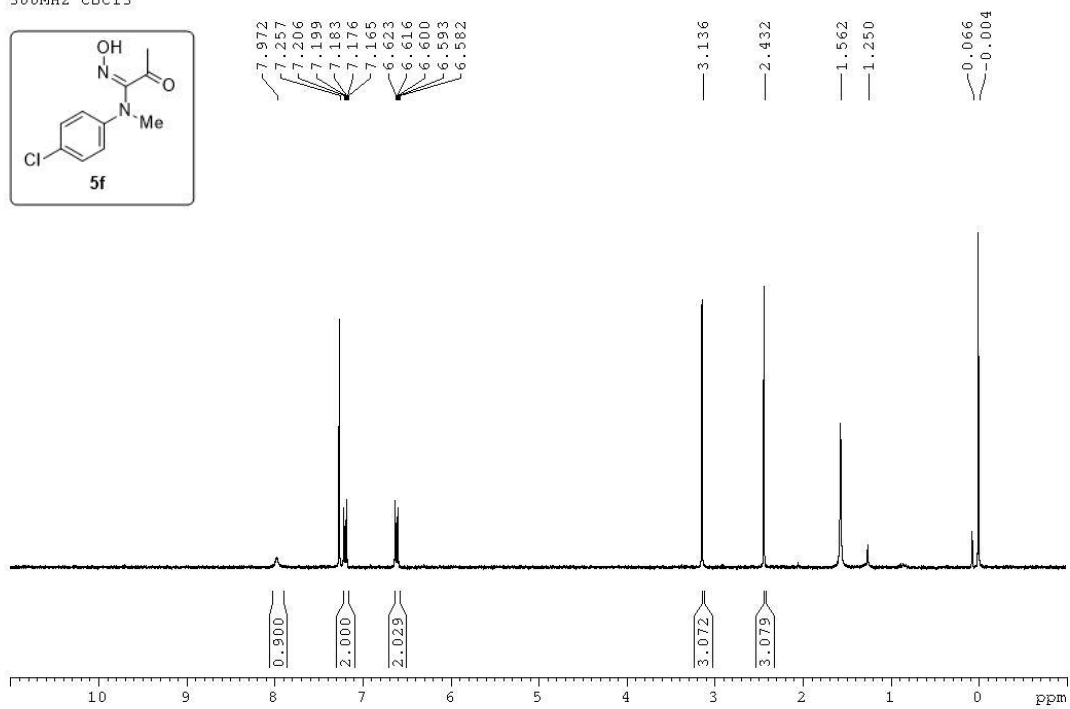

150MHz CDCl<sub>3</sub>

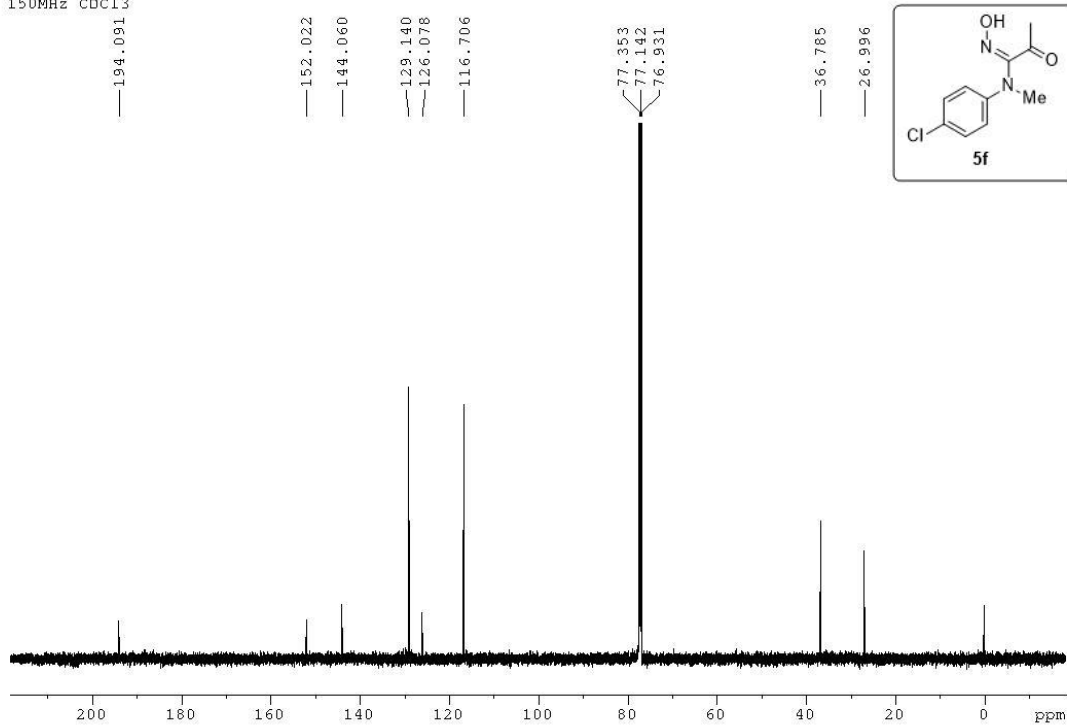

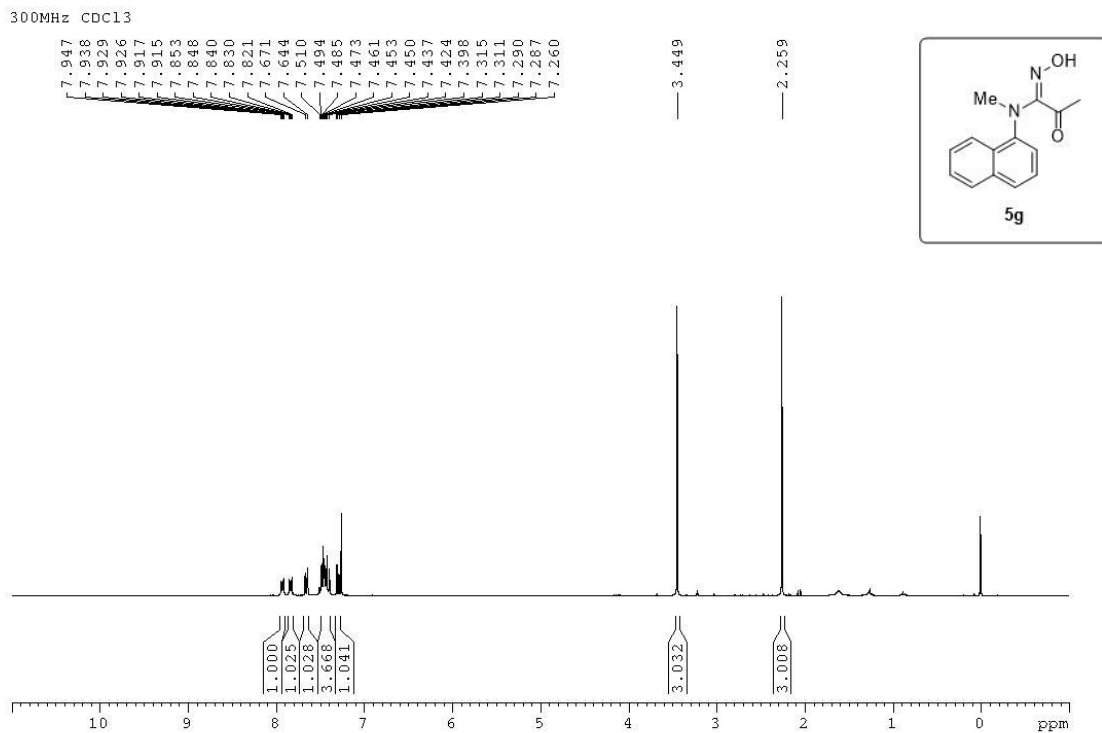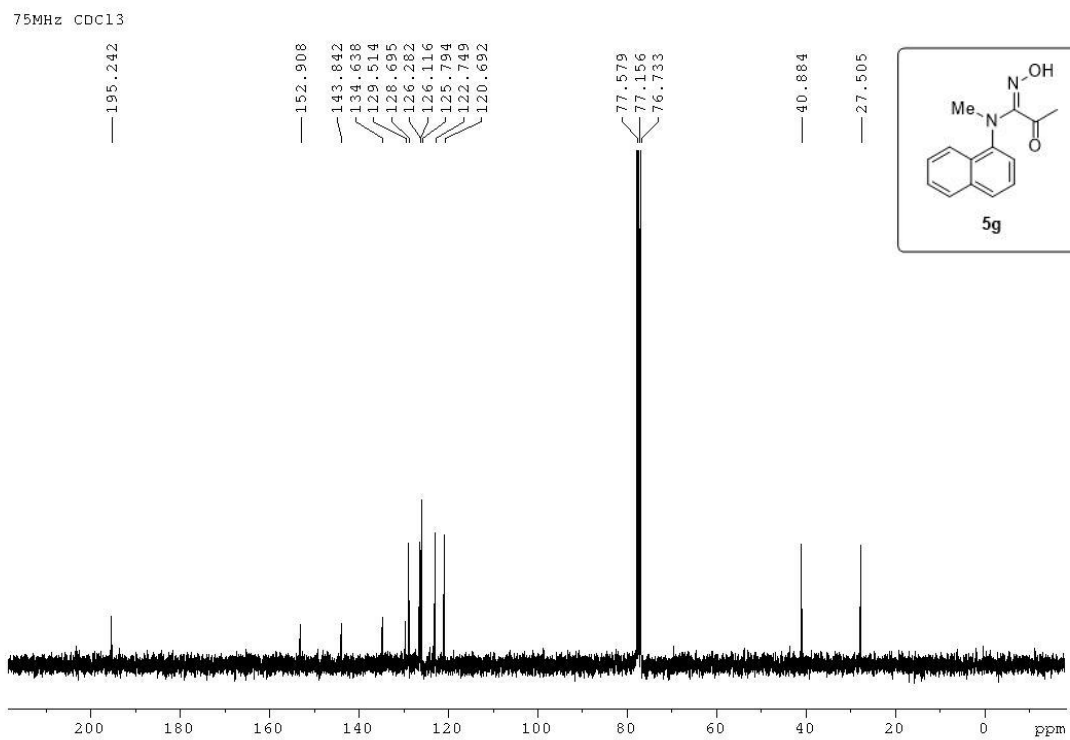

600MHz CDCl<sub>3</sub>

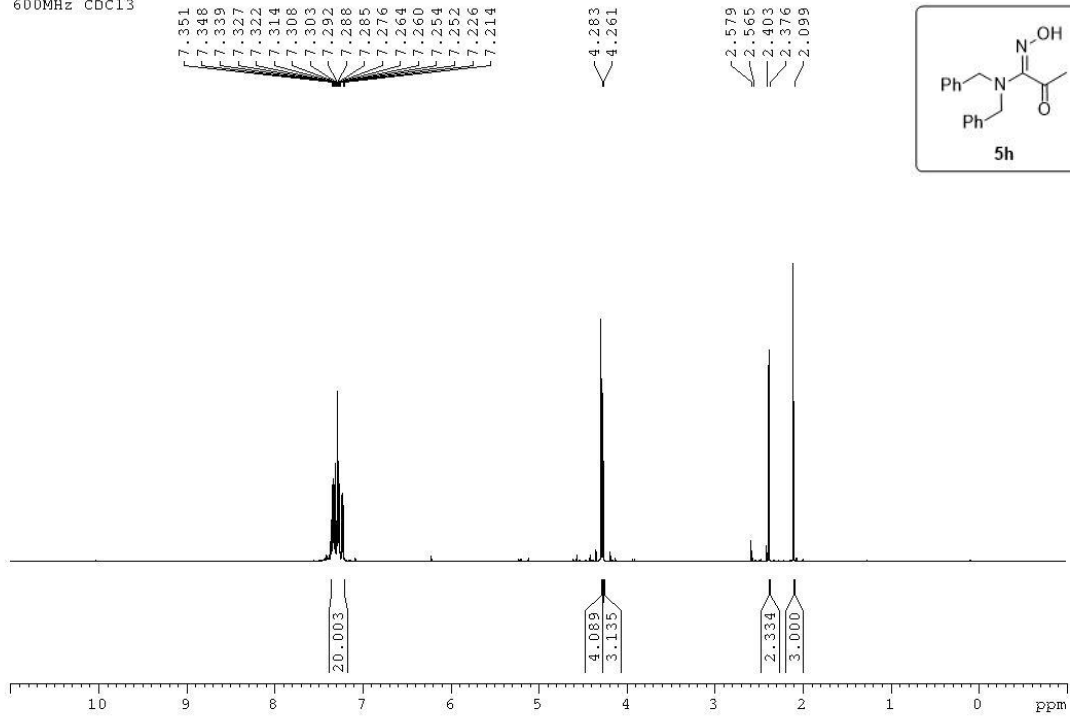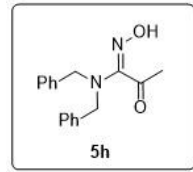

150MHz CDCl<sub>3</sub>

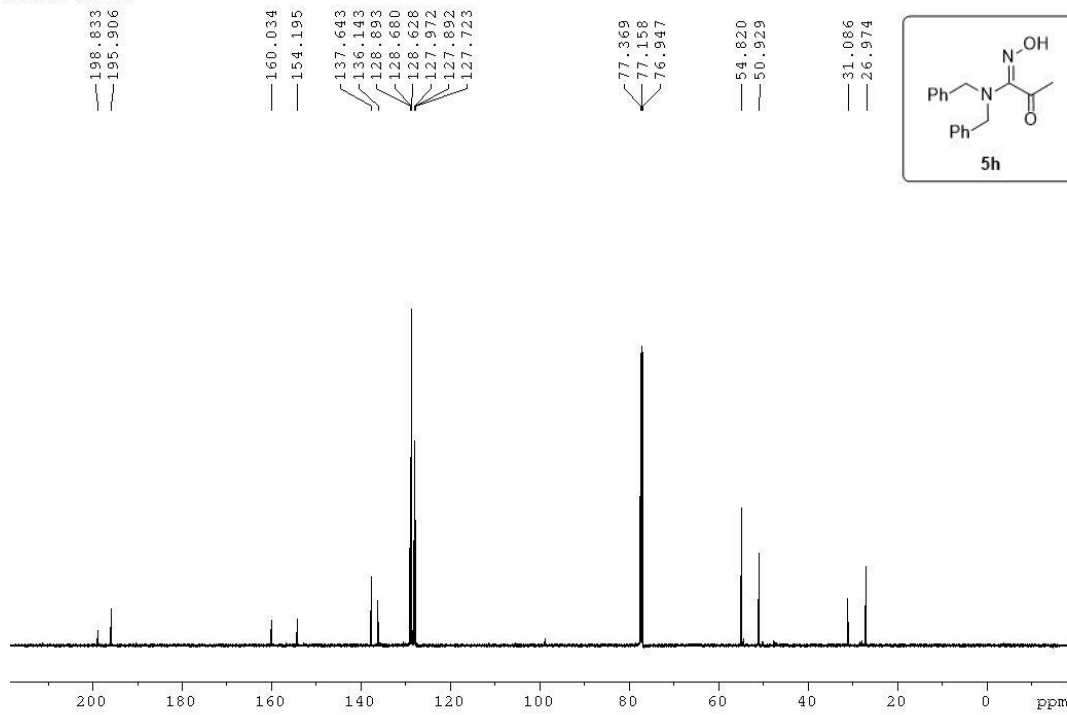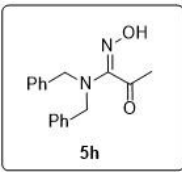

600MHz CDCl<sub>3</sub>

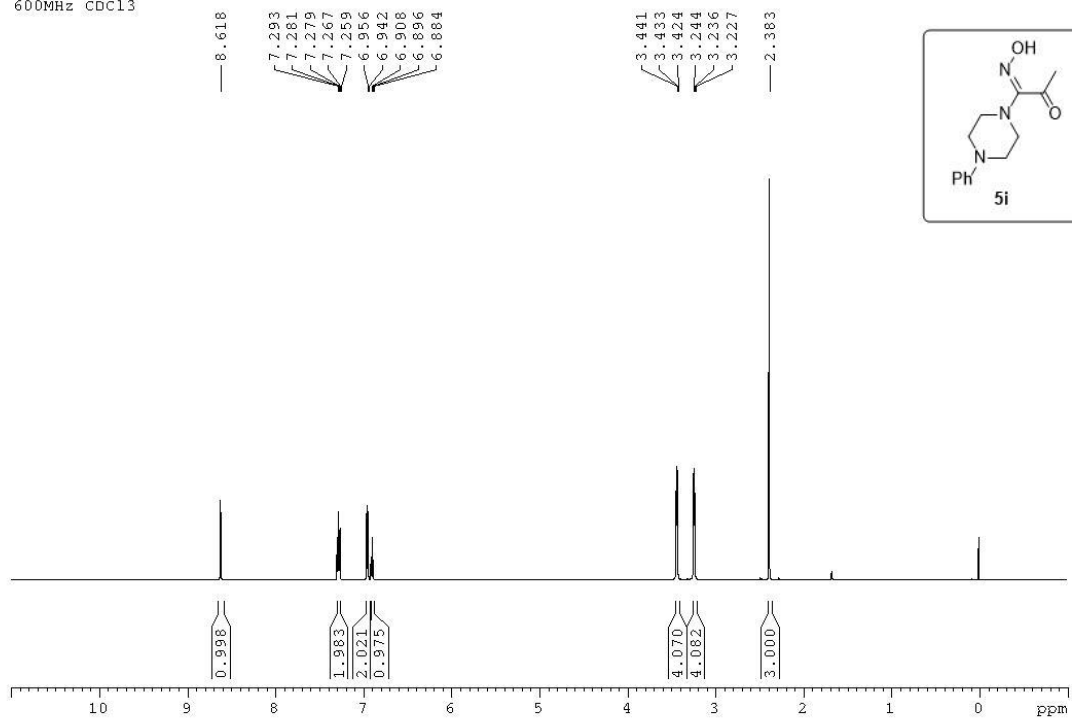

150MHz CDCl<sub>3</sub>

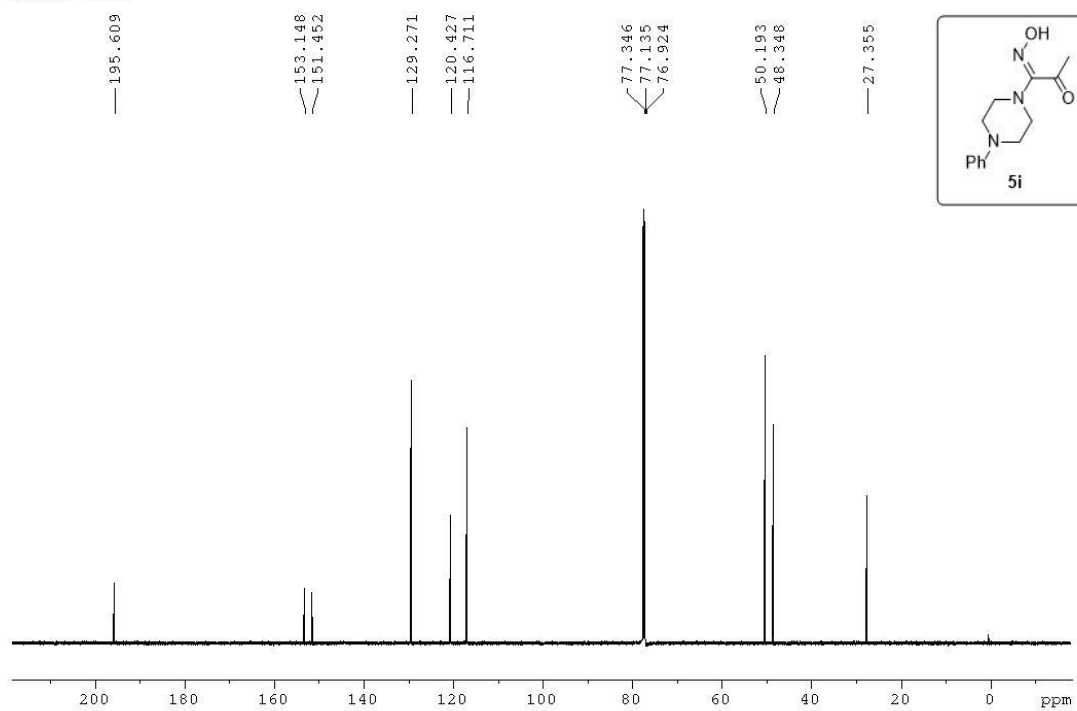



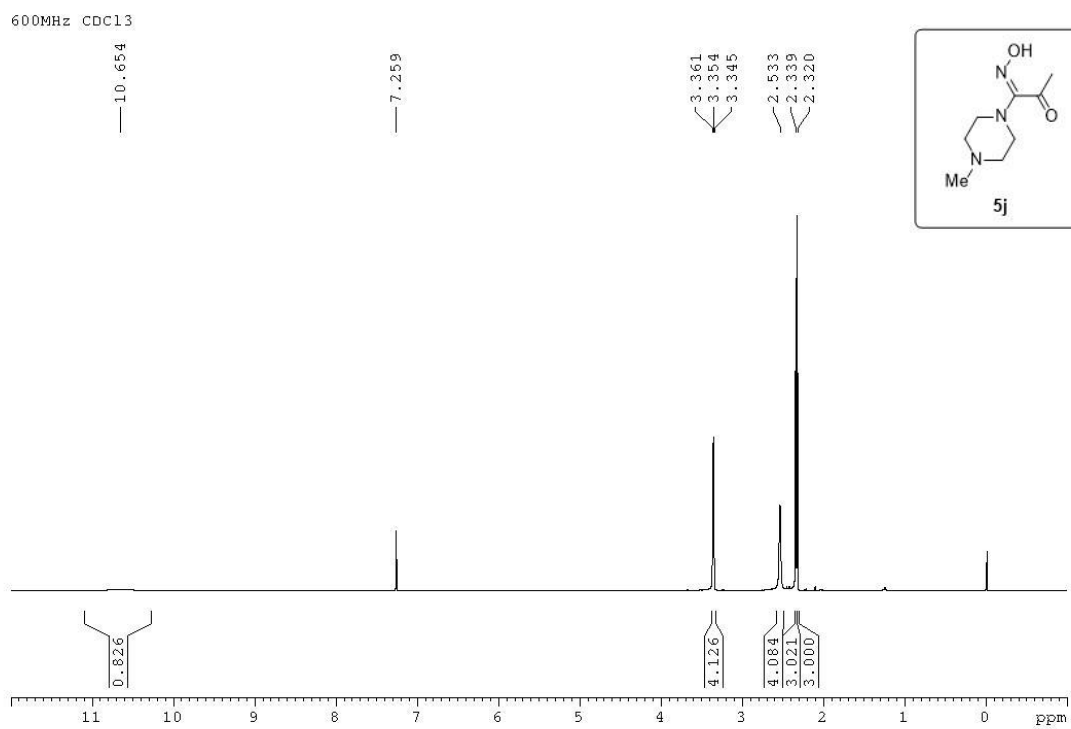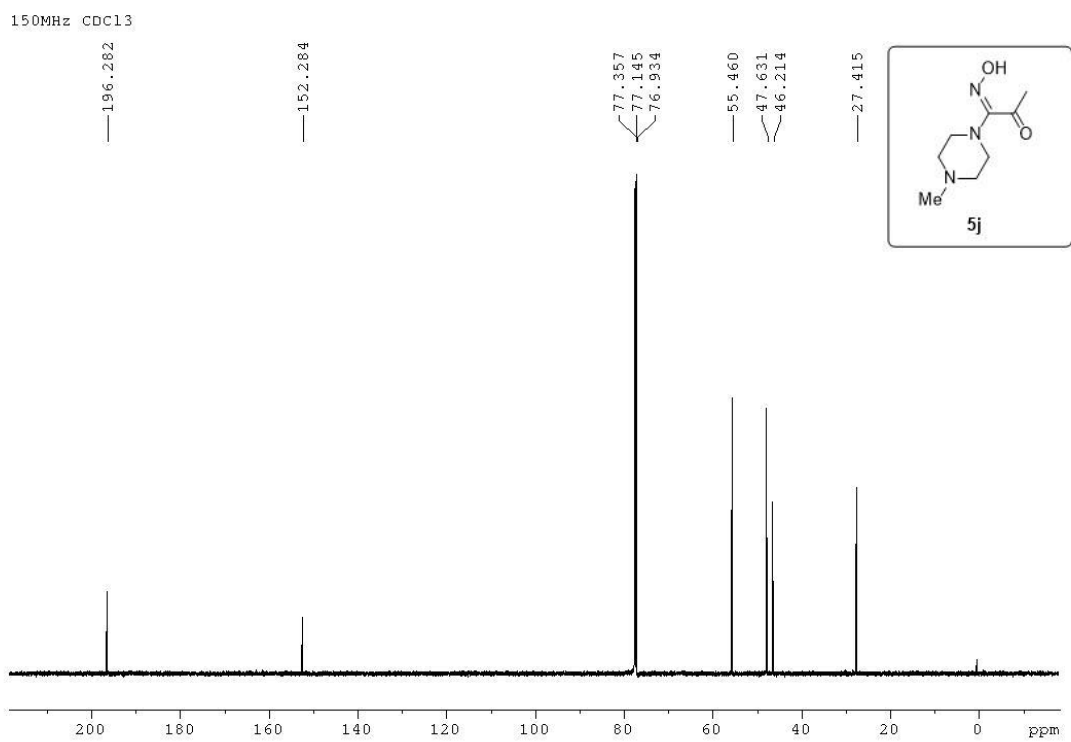

600MHz CDCl<sub>3</sub>

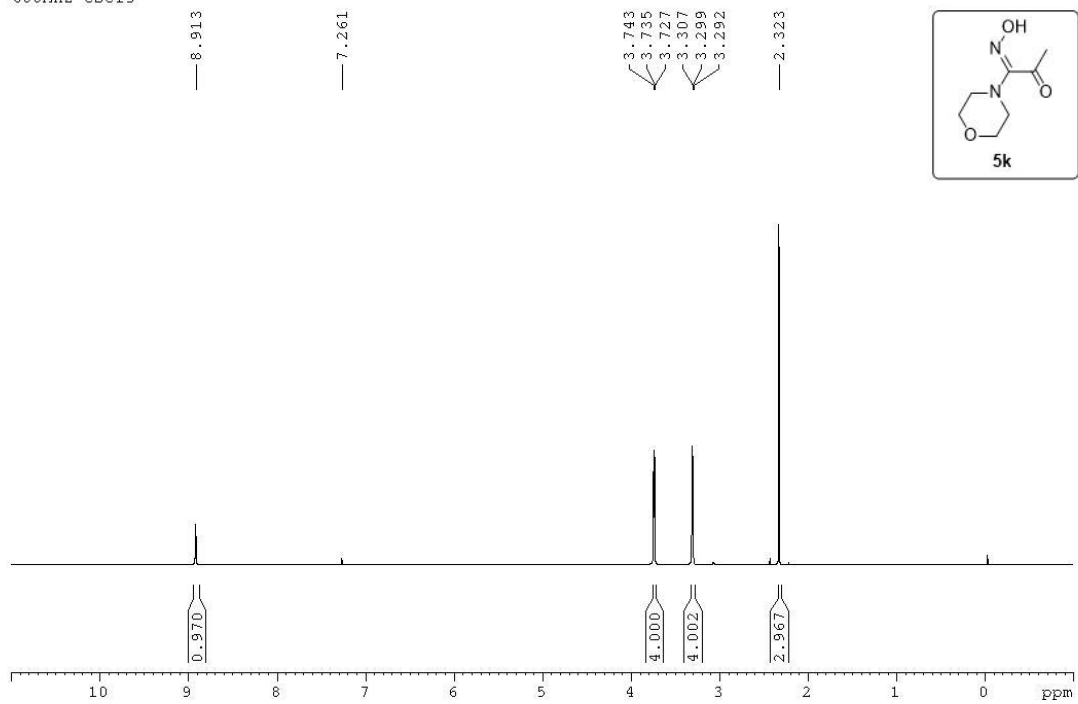

150MHz CDCl<sub>3</sub>

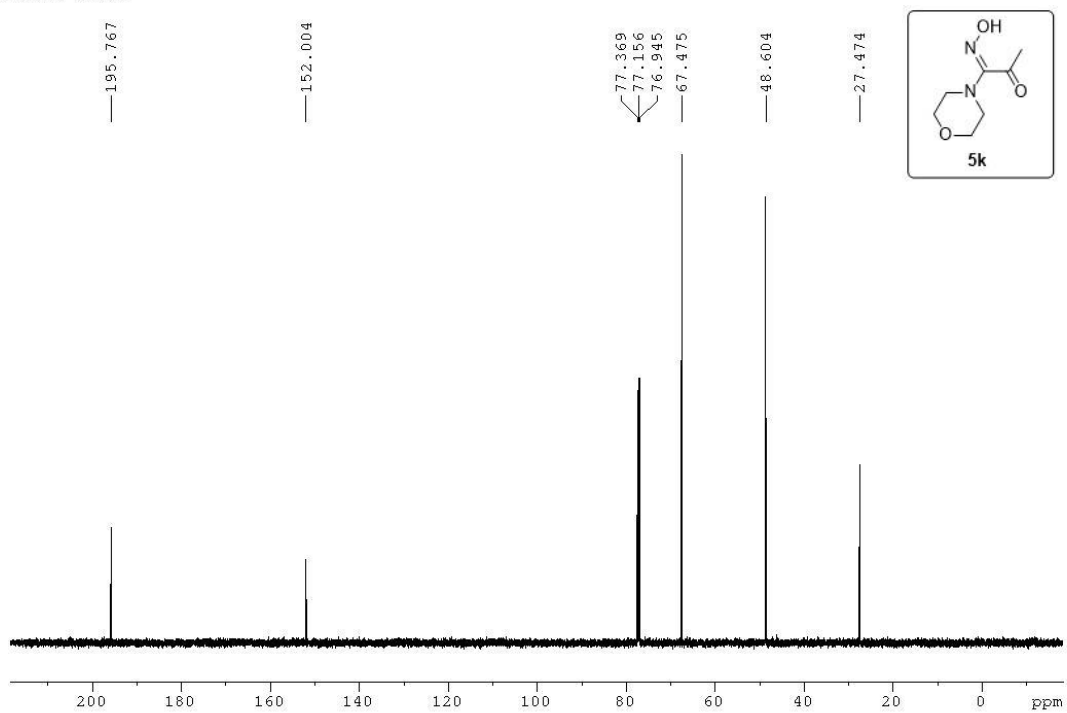

600MHz CDCl<sub>3</sub>

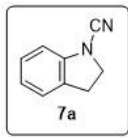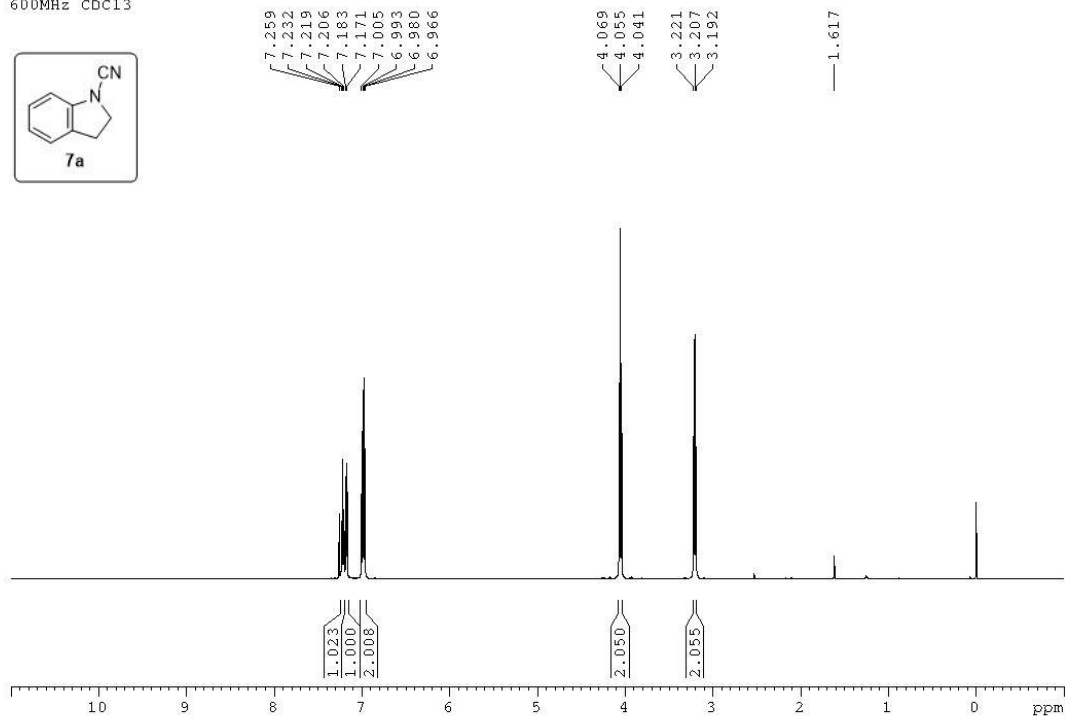

600MHz CDCl<sub>3</sub>

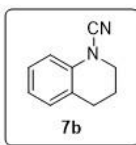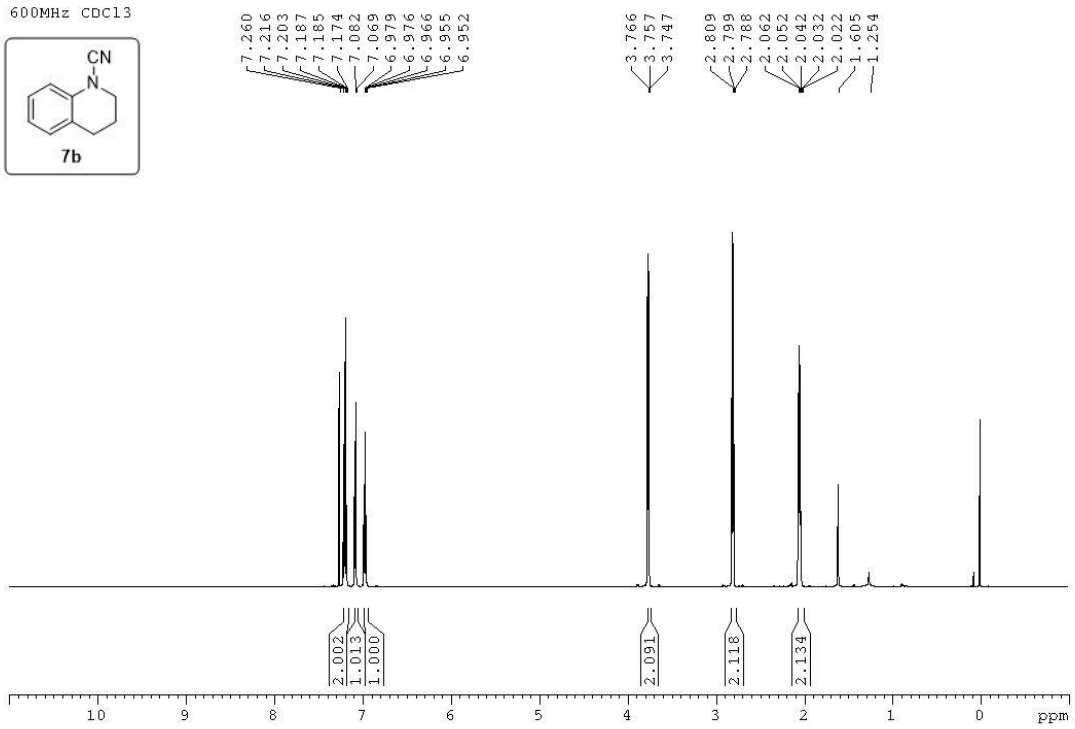

600MHz CDCl<sub>3</sub>

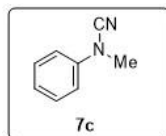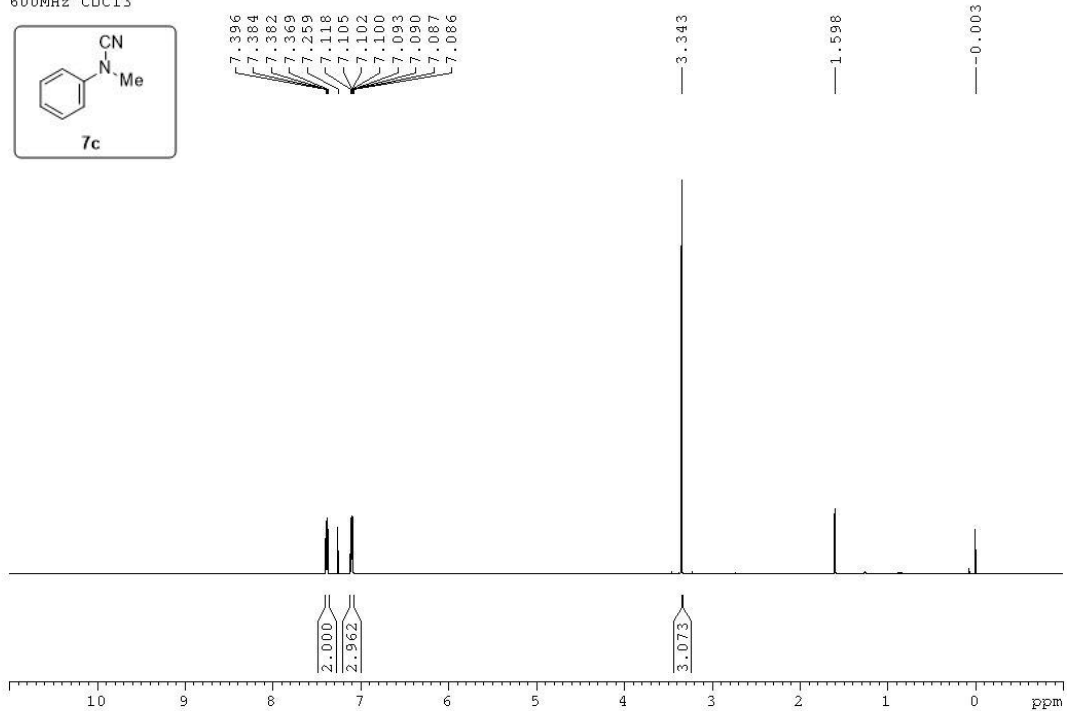

600MHz CDCl<sub>3</sub>

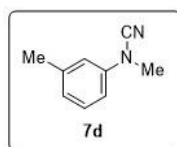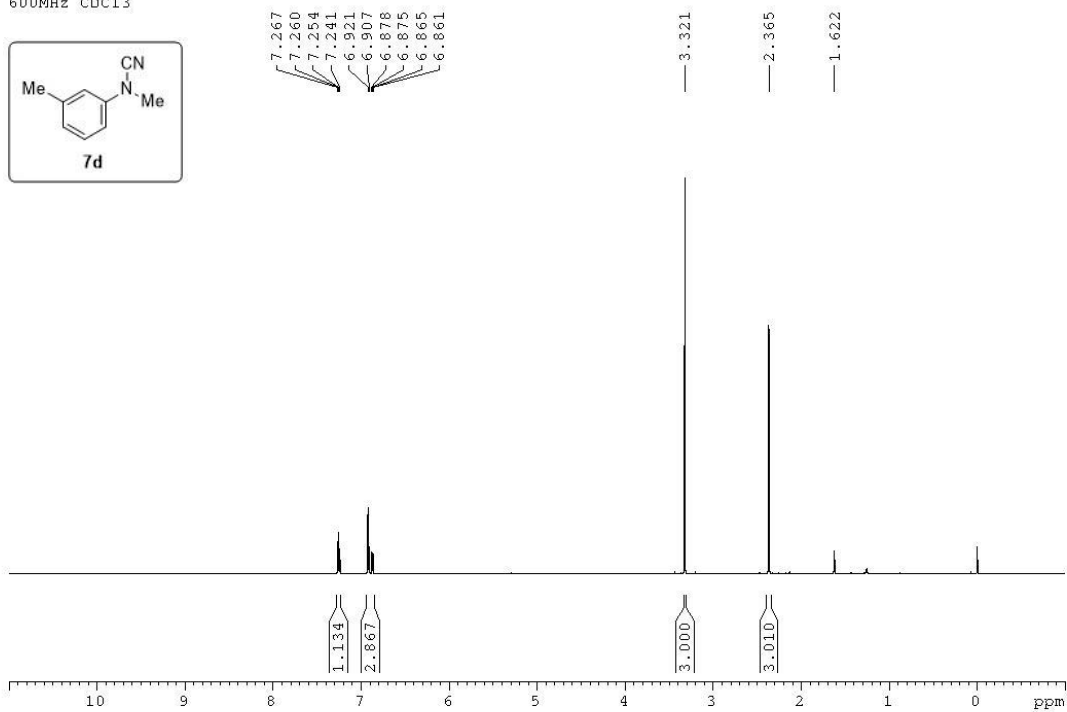

150MHz CDCl<sub>3</sub>

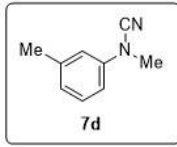

140.430  
139.903  
129.522  
124.321  
115.760  
114.398  
111.951

77.365  
77.154  
76.942

36.891

21.656

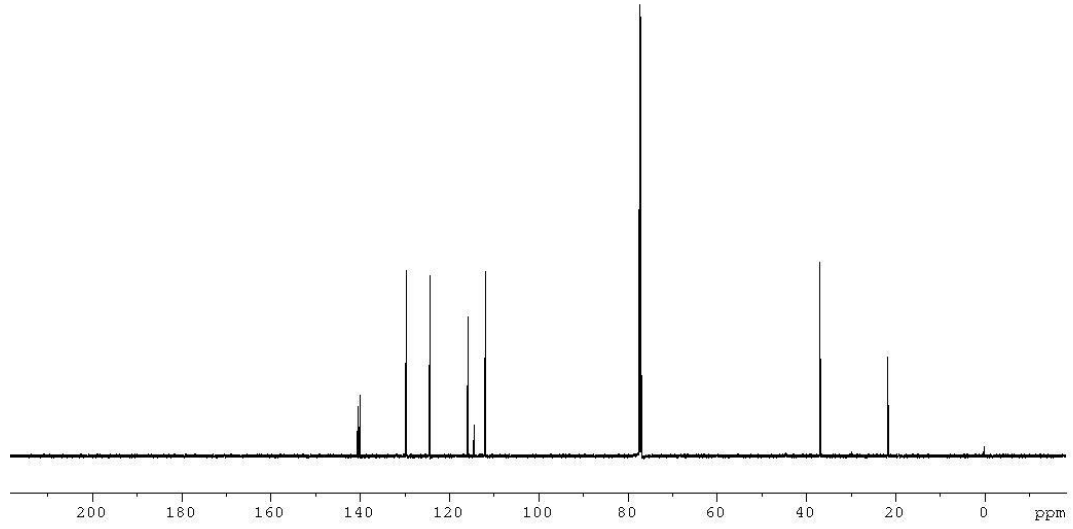

600MHz CDCl<sub>3</sub>

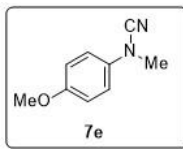

7.259  
7.027  
7.021  
7.017  
7.010  
7.006  
7.000  
6.914  
6.908  
6.905  
6.897  
6.893  
6.887

3.783

3.289

1.678

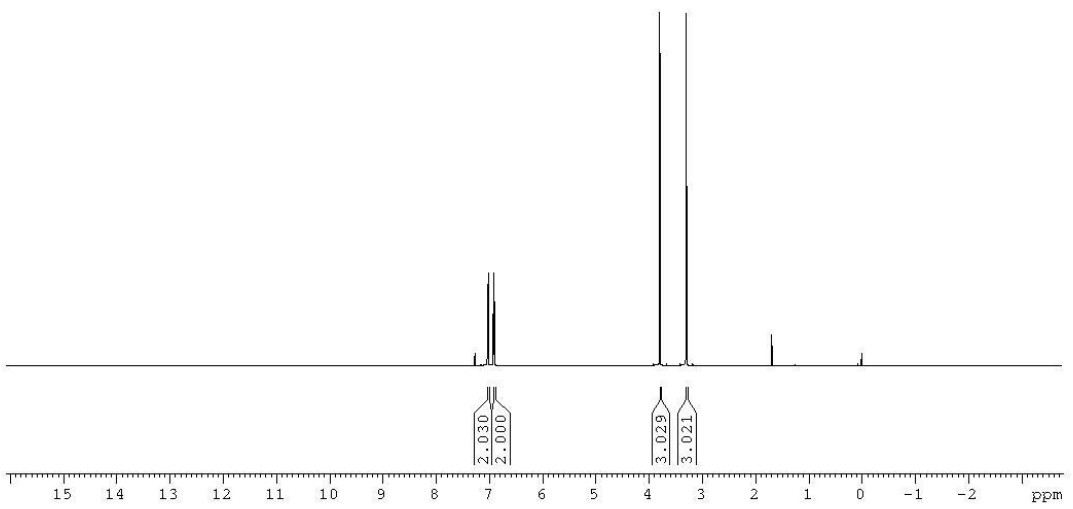

150MHz CDCl<sub>3</sub>

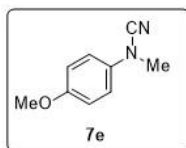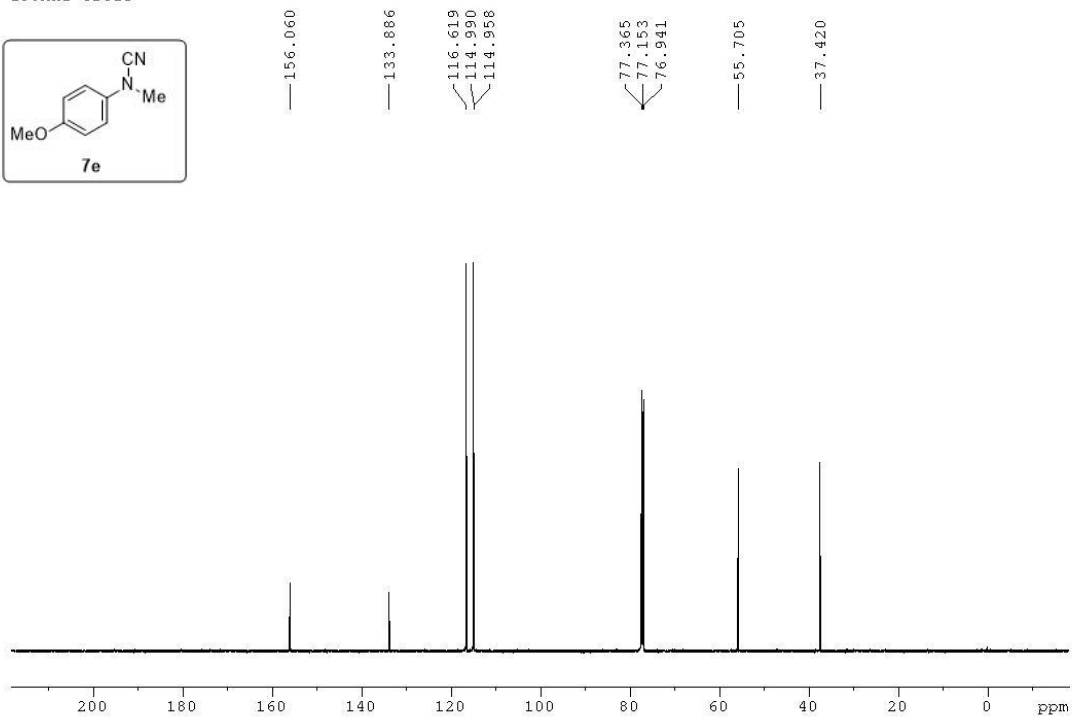

600MHz Acetone-d<sub>6</sub>

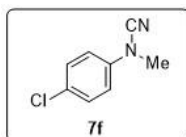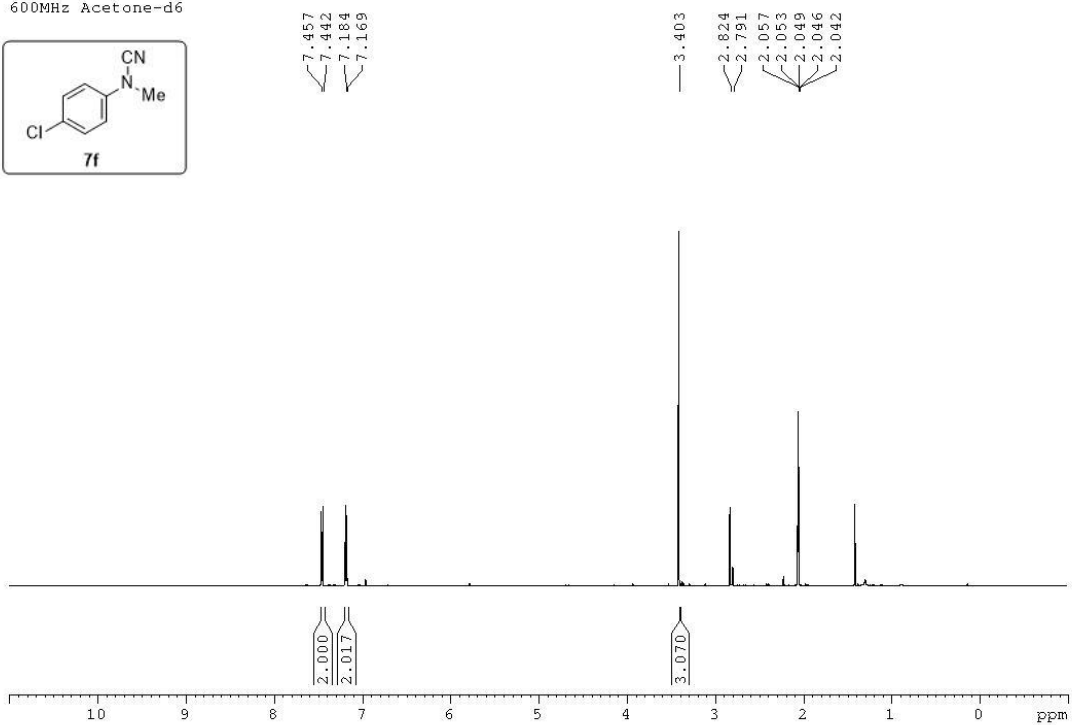

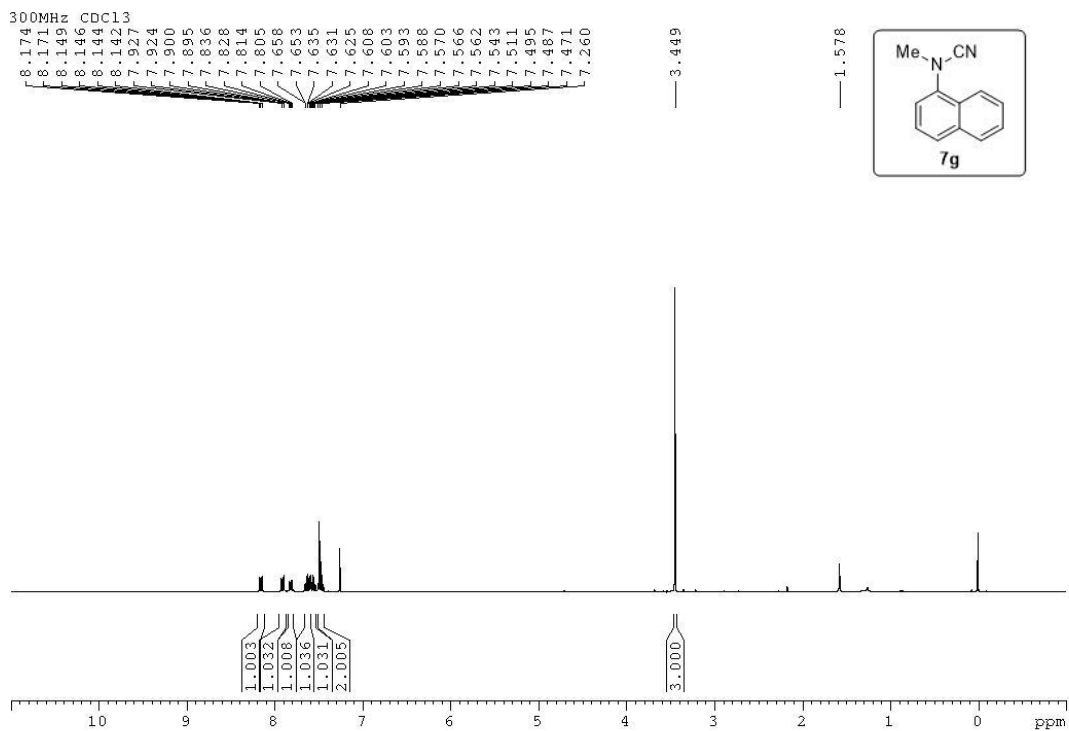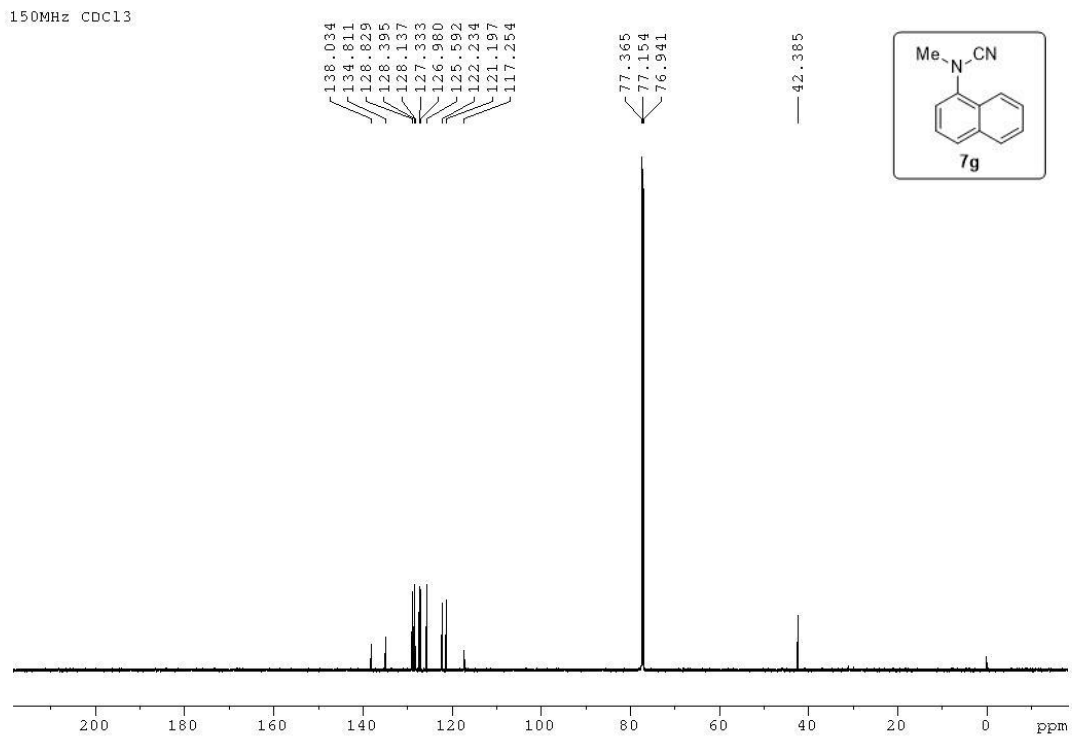

600MHz CDCl<sub>3</sub>

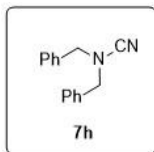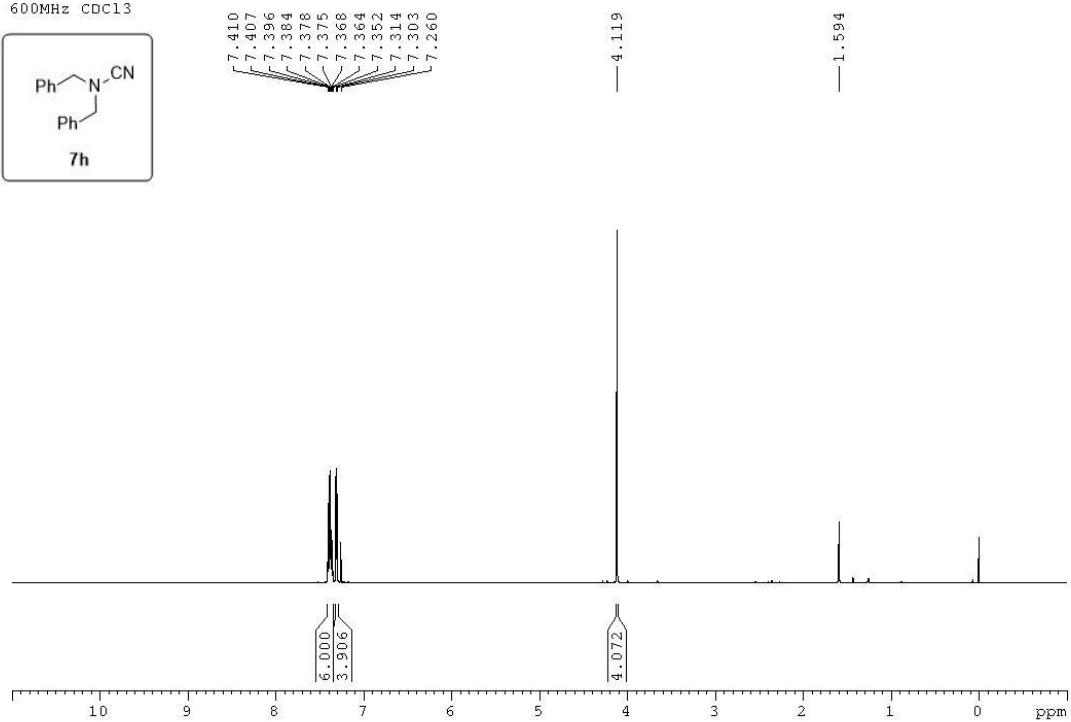

600MHz CDCl<sub>3</sub>

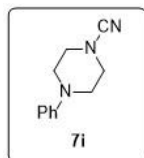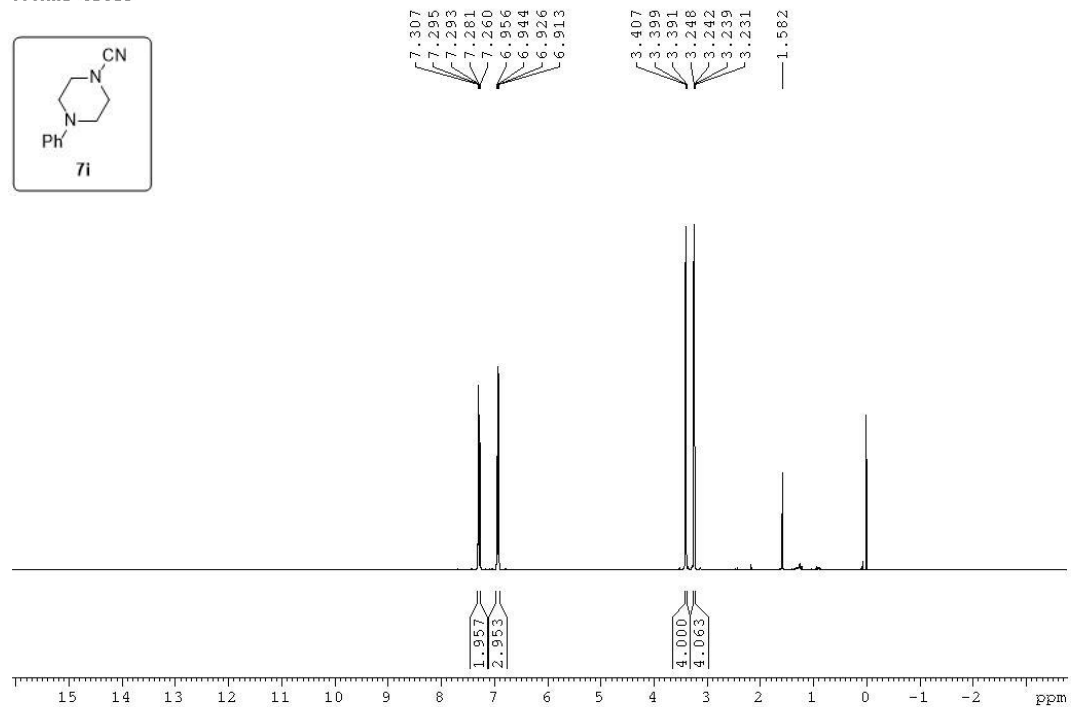



300MHz CDCl<sub>3</sub>

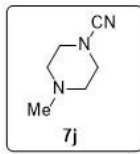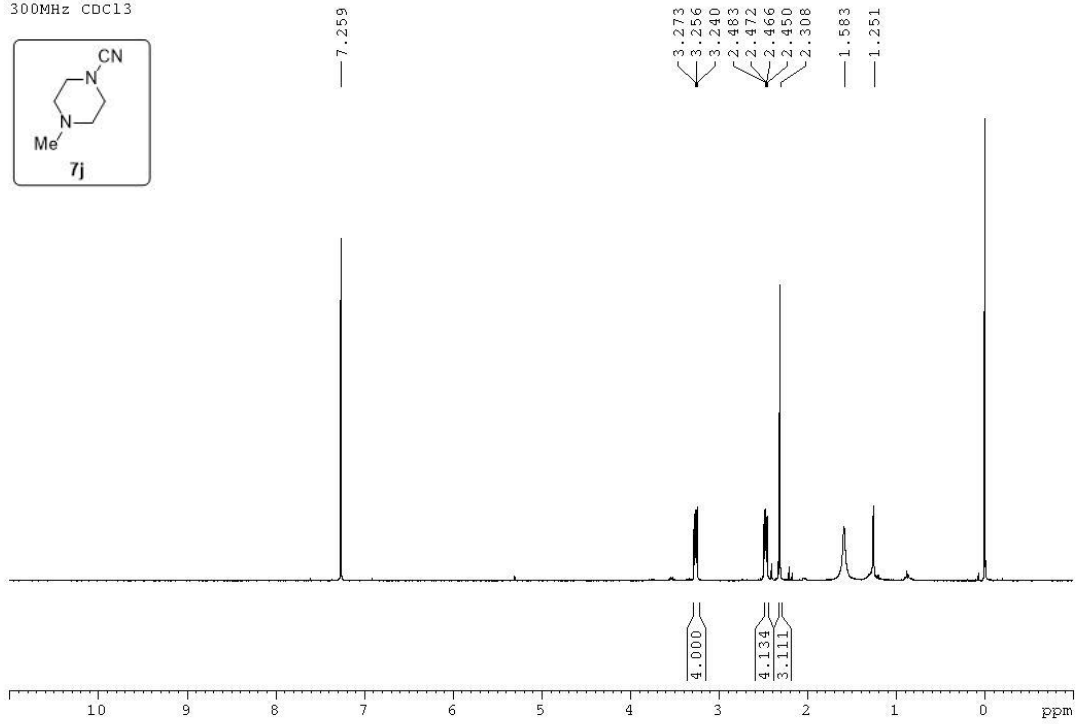

600MHz CDCl<sub>3</sub>

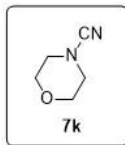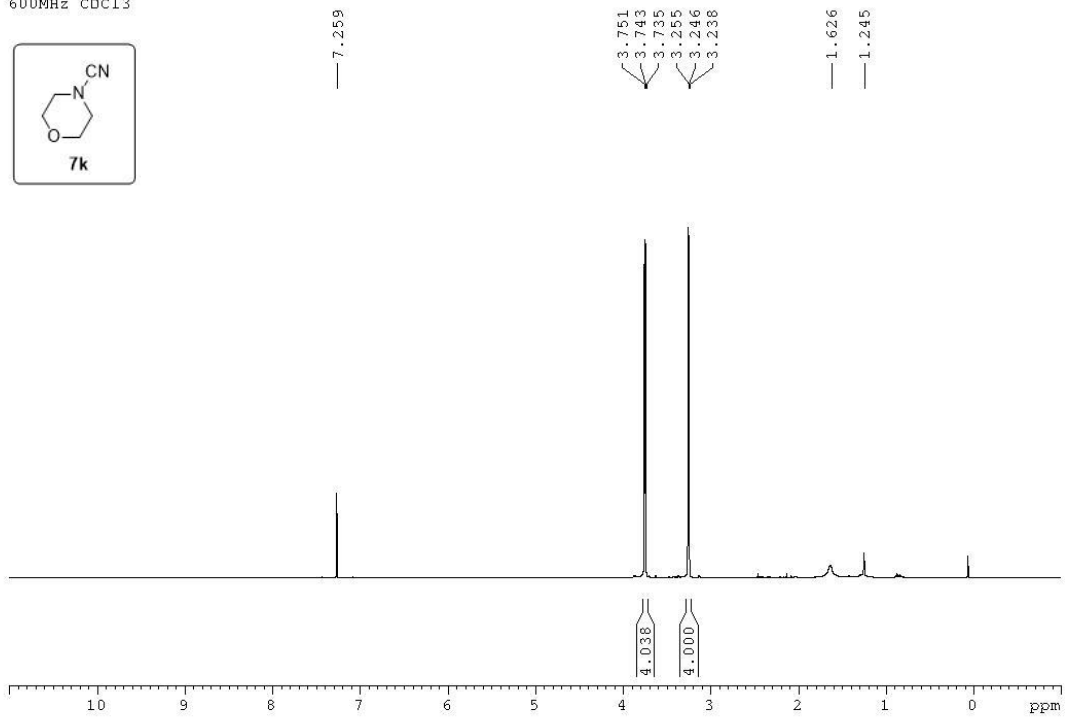

600MHz CDCl<sub>3</sub>

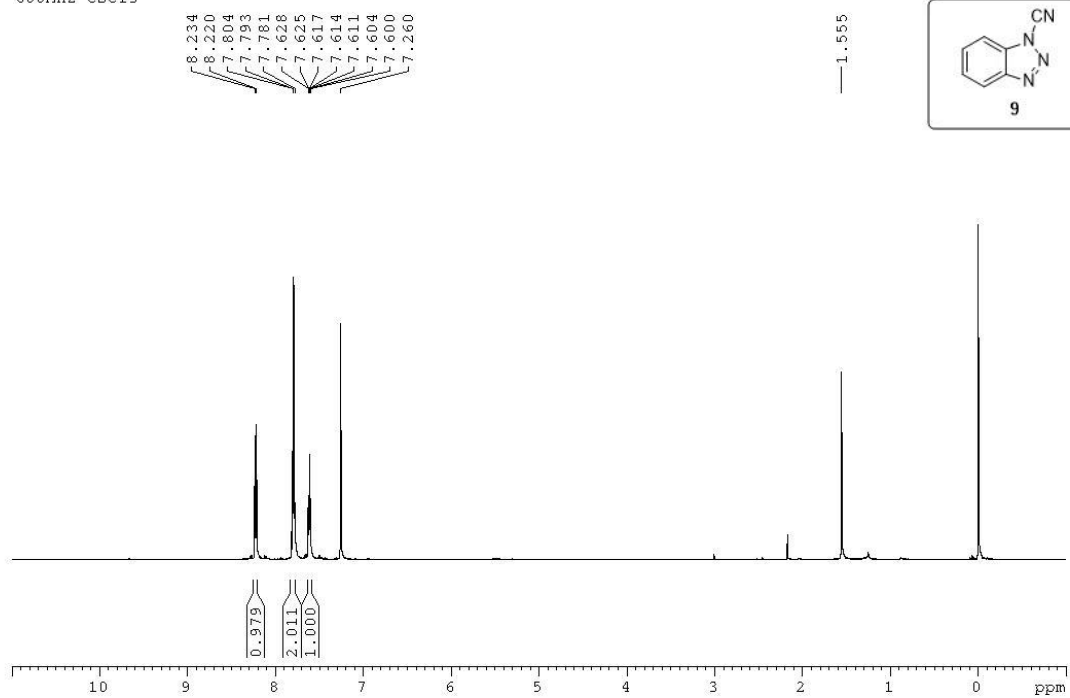

150MHz CDCl<sub>3</sub>

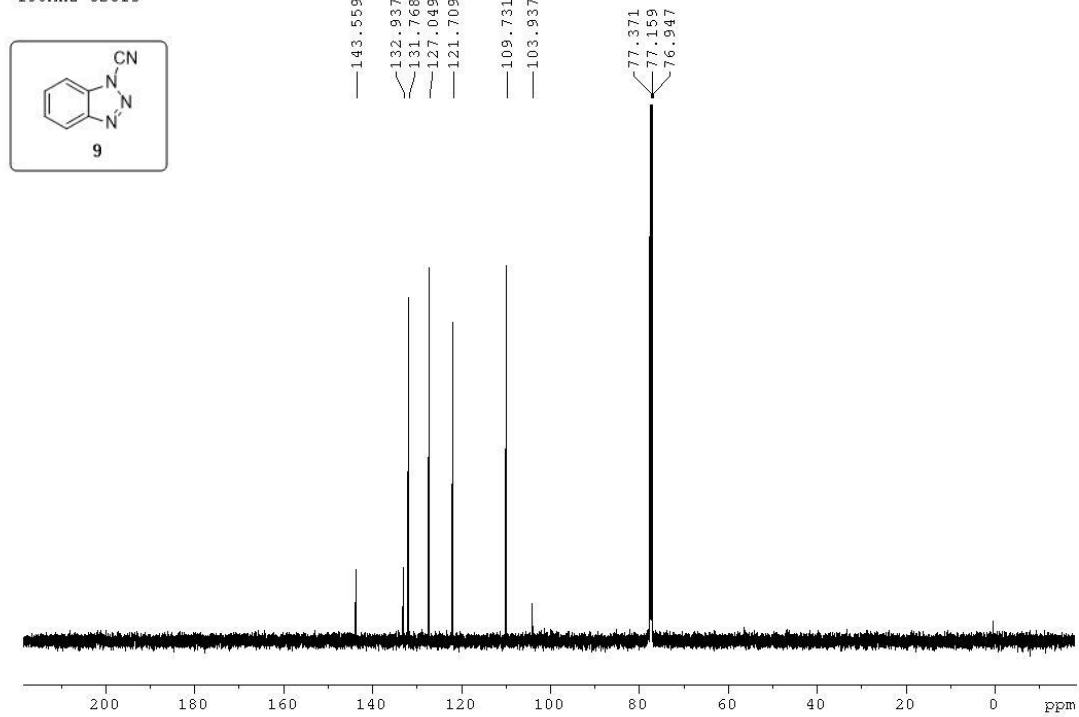

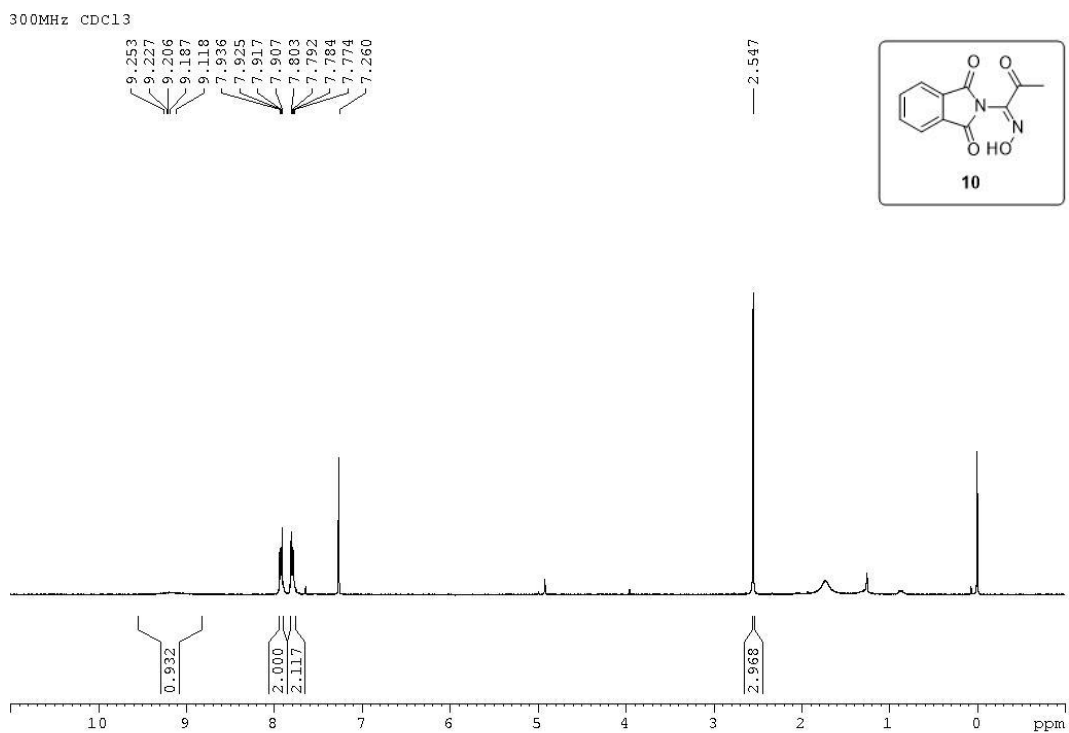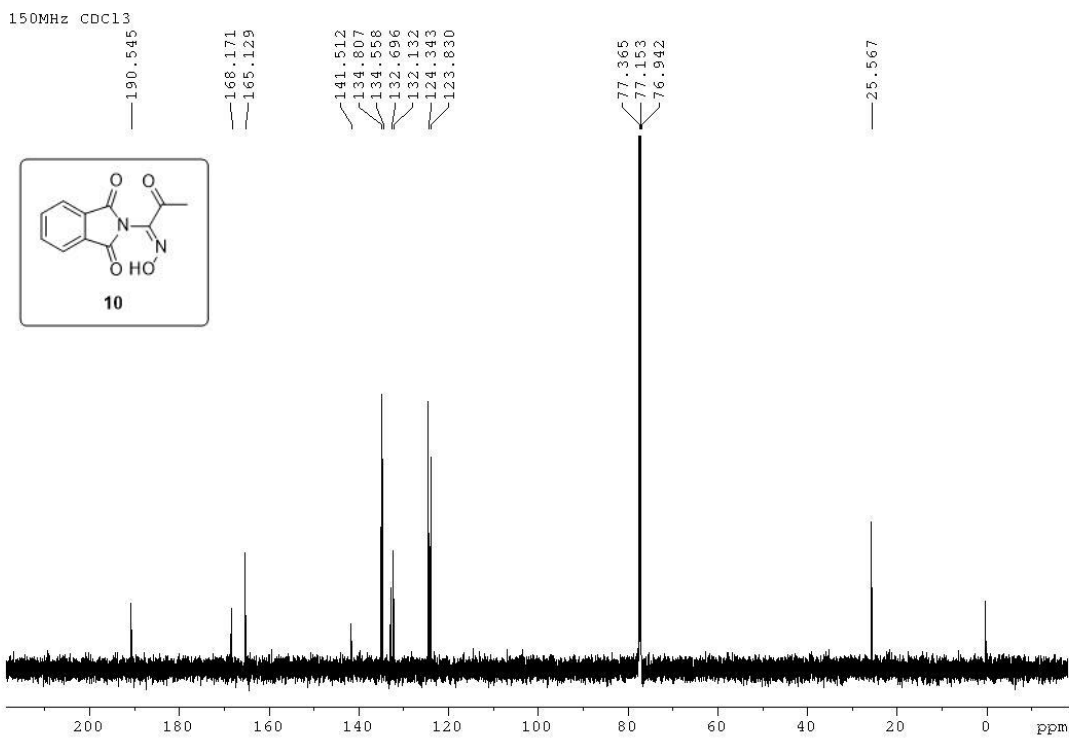

300MHz DMSO-d6

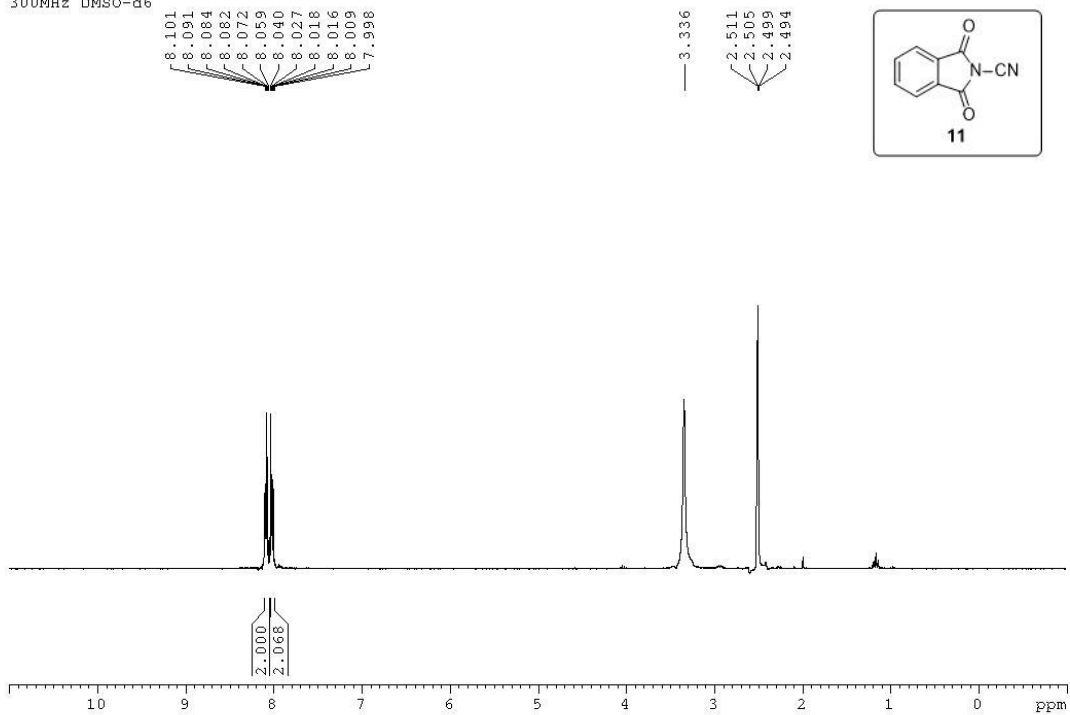

75MHz DMSO-d6

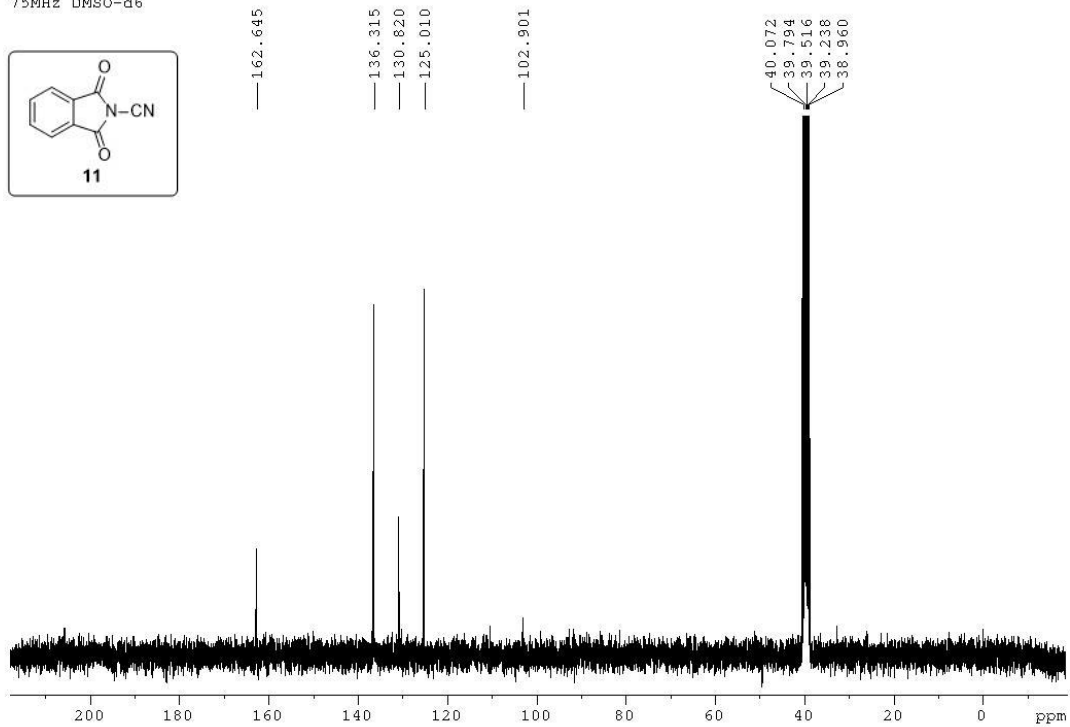

600MHz DMSO-d6

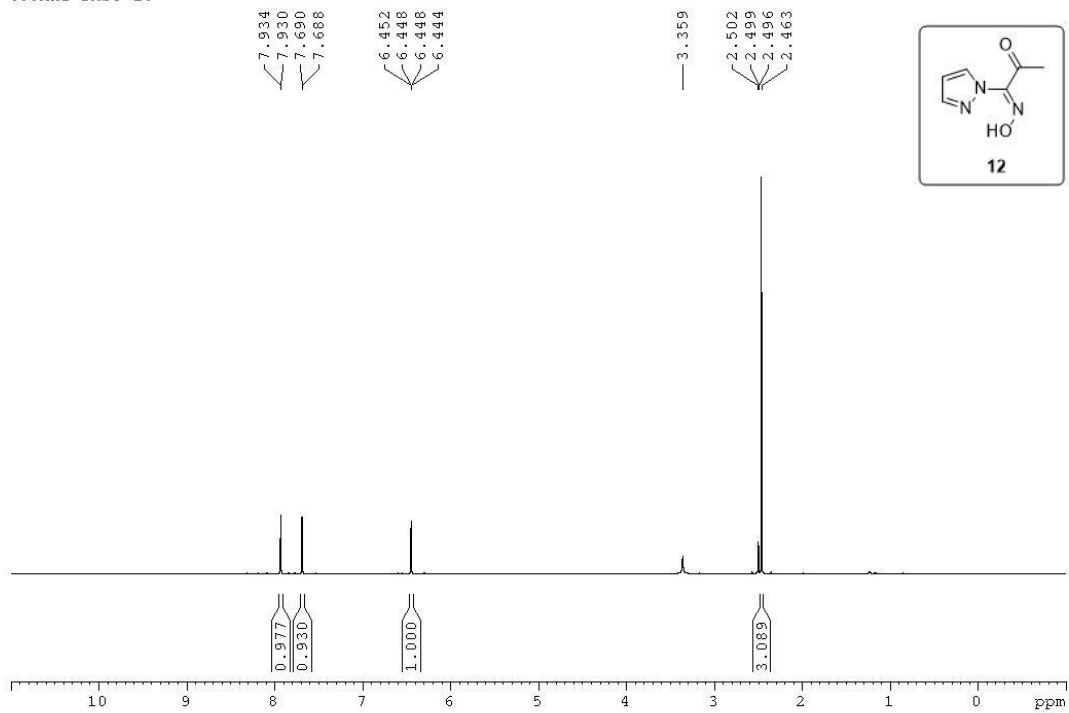

150MHz DMSO-d6

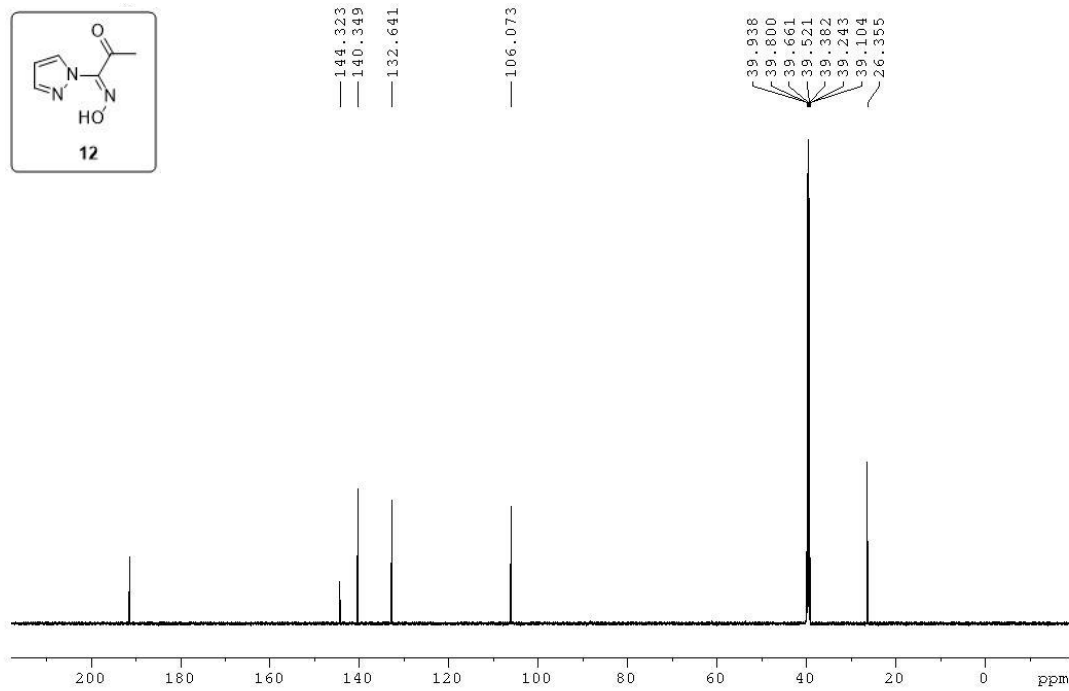

300MHz CDCl3

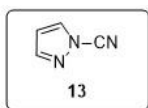

7.890  
7.881  
7.831  
7.827  
7.260  
6.511  
6.505  
6.502  
6.496

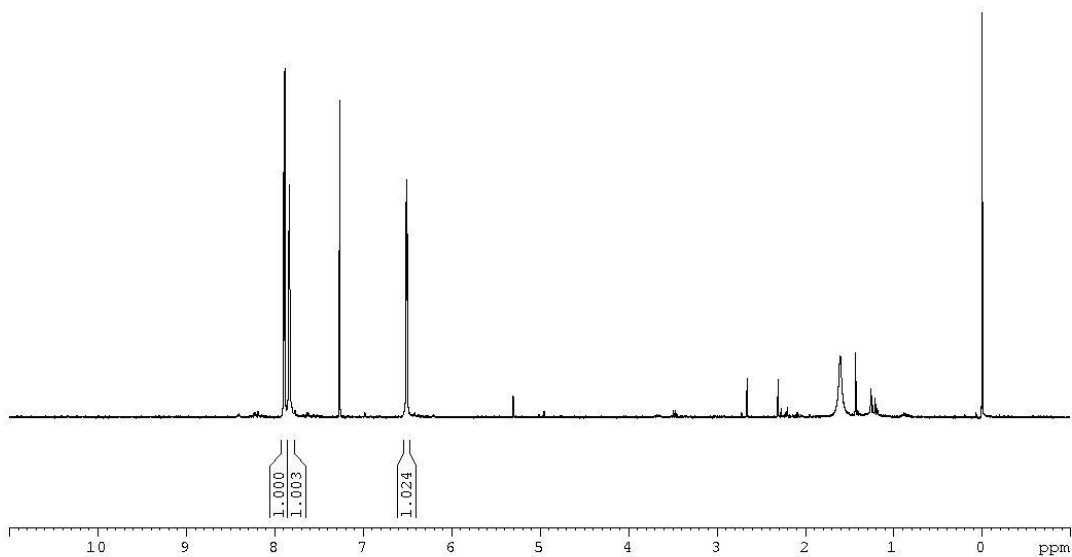

150MHz CDCl3

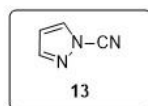

145.867  
134.688  
109.736  
106.843  
77.366  
77.155  
76.942

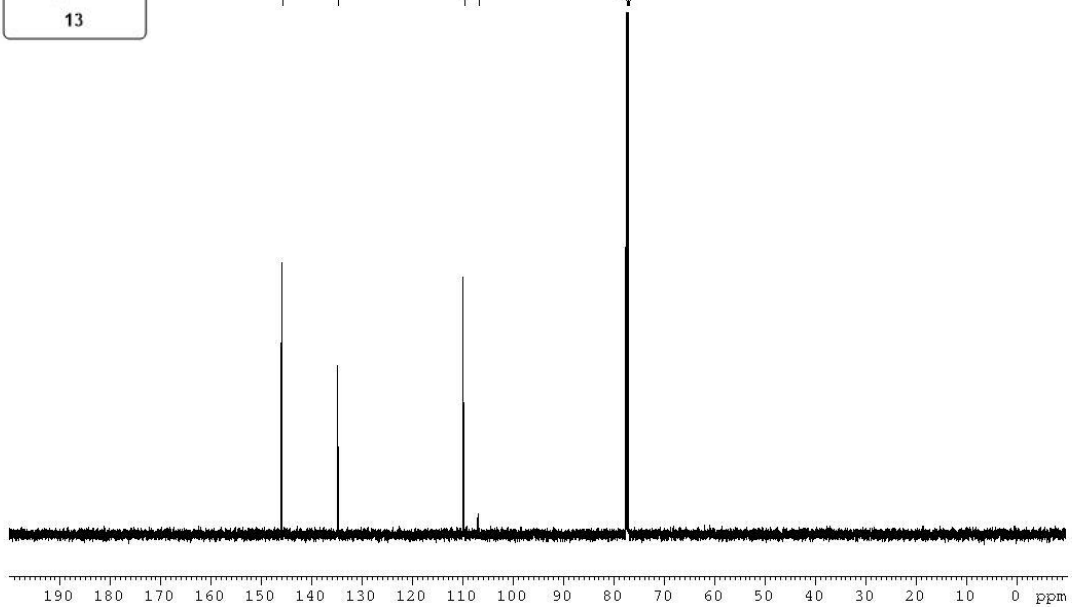

## 6. References

1. C. Kesornpun, T. Aree, C. Mahidol, S. Ruchirawat, P. Kittakoop, *Angew. Chem. Int. Ed.*, 2016, **55**, 3997–4001.
2. C. Jiang, Y. Zhu, H. Li, P. Liu, P. Sun, *J. Org. Chem.*, 2022, **87**, 10026–10033.
3. N. L. Brock, A. Nikolay, J. S. Dickschat, *Chem. Commun.*, 2014, **50**, 5487–5489.
4. W. Guo, W. Tan, M. Zhao, L. Zheng, K. Tao, D. Chen, X. Fan, *J. Org. Chem.*, 2018, **83**, 6580–6588.
5. X. Li, C. Golz, M. Alcarazo, *Angew. Chem. Int. Ed.*, 2019, **58**, 9496–9500.
6. I. D. Cunningham, B. G. Cox, N. C. Wan, D. C. Povey, G. W. Smith, *J. Chem. Soc., Perkin Trans. 2.*, 1999, 693–698.
7. Z. Chen, W. Yuan, *Chem. Eur. J.*, 2021, **27**, 14836–14840.
8. H. Liang, L. Bao, Y. Du, Y. Zhang, S. Pang, C. Sun, *Synlett.*, 2017, **28**, 2675–2679.
9. B. Al-Saleh, M. A. El-Asery, M. H. Elnagdi, *J. Heterocyclic. Chem.*, 2005, **42**, 483–486.
10. A. R. Katritzky, R. Akue-Gedu, A. V. Vakulenko, *Arkivoc.*, 2007, **3**, 5–12.
11. P. Anbarasan, H. Neumann, M. Beller, *Chem. Eur. J.*, 2010, **16**, 4725–4728.
